# Supplementary material for: Porphyrins as Promising Photocatalysts for Red-Light-Induced Functionalizations of Biomolecules
Source: PubMed Central journal article supplement (PMC9955257; doi:10.1021/acsorginorgau.2c00025), 2022-07-15

**Supporting Information**

**Porphyrins as Promising Photocatalysts for  
Red-Light Induced Functionalizations of Biomolecules**

Katarzyna Rybicka-Jasińska,\* Tomasz Wdowik, Klaudia Łuczak,  
Aleksandra J. Wierzba, Olga Drapała, Dorota Gryko\*

Institute of Organic Chemistry Polish Academy of Sciences, Kasprzaka 01-224 Warsaw, Poland

e-mail: [katarzyna.rybickajasinska@icho.edu.pl](mailto:katarzyna.rybickajasinska@icho.edu.pl)  
[dorota.gryko@icho.edu.pl](mailto:dorota.gryko@icho.edu.pl)

## Table of Contents

|                                                                                                                                                                                                                                                                      |           |
|----------------------------------------------------------------------------------------------------------------------------------------------------------------------------------------------------------------------------------------------------------------------|-----------|
| <b>1. General Information.....</b>                                                                                                                                                                                                                                   | <b>3</b>  |
| <b>2. Photoreactor Setups .....</b>                                                                                                                                                                                                                                  | <b>4</b>  |
| <b>3. Porphyrins as photoreductants in red-light catalysis – oxidative quenching catalytic cycles.</b>                                                                                                                                                               | <b>5</b>  |
| 3.1 Arylation reactions .....                                                                                                                                                                                                                                        | 5         |
| 3.2 Photocatalytic hydrogenation of nitrobenzenes.....                                                                                                                                                                                                               | 8         |
| <b>4. Porphyrins as photooxidants red-light catalysis – reductive quenching catalytic cycles.....</b>                                                                                                                                                                | <b>10</b> |
| 4.1 $\alpha$ -Functionalization of aldehydes with diazo esters.....                                                                                                                                                                                                  | 10        |
| 4.2. Photocatalytic thiol-ene reaction .....                                                                                                                                                                                                                         | 10        |
| 4.3. Reductive decarboxylative C(sp <sup>3</sup> )–C(sp) bond coupling reaction .....                                                                                                                                                                                | 20        |
| <b>5. NMR SPECTRA .....</b>                                                                                                                                                                                                                                          | <b>31</b> |
| 5.1. <i>N</i> -(4-aminophenyl)-2-propylpentanamide ( <b>11</b> ).....                                                                                                                                                                                                | 311       |
| 5.2. (( <i>1s,3s</i> )-adamantan-1-yl)(styryl)sulfane ( <b>17d</b> ) (two diastereoisomers) .....                                                                                                                                                                    | 32        |
| 5.3. methyl <i>N</i> -( <i>tert</i> -butoxycarbonyl)- <i>S</i> -styryl- <i>L</i> -cysteinyl- <i>L</i> -phenylalaninate ( <b>17f</b> ).....                                                                                                                           | 333       |
| 5.4. (2 <i>R</i> ,3 <i>R</i> ,4 <i>S</i> ,5 <i>R</i> ,6 <i>S</i> )-2-(acetoxymethyl)-6-((4-fluorostyryl)thio)tetrahydro-2 <i>H</i> -pyran-3,4,5-triyl triacetate ( <b>17h</b> ) (two diastereoisomers).....                                                          | 344       |
| 5.5. (2 <i>R</i> ,3 <i>R</i> ,4 <i>S</i> ,5 <i>R</i> ,6 <i>S</i> )-2-(acetoxymethyl)-6-((4-methoxystyryl)thio)tetrahydro-2 <i>H</i> -pyran-3,4,5-triyl triacetate ( <b>17i</b> ) (two diastereoisomers) .....                                                        | 36        |
| 5.6. (2 <i>R</i> ,3 <i>R</i> ,4 <i>S</i> ,5 <i>R</i> ,6 <i>S</i> )-2-(acetoxymethyl)-6-((1,2-diphenylvinyl)thio)tetrahydro-2 <i>H</i> -pyran-3,4,5-triyl triacetate ( <b>17j</b> ) (two diastereoisomers) .....                                                      | 37        |
| 5.7. (2 <i>R</i> ,3 <i>R</i> ,4 <i>S</i> ,5 <i>R</i> ,6 <i>S</i> )-2-(acetoxymethyl)-6-(oct-1-en-1-ylthio)tetrahydro-2 <i>H</i> -pyran-3,4,5-triyl triacetate ( <b>17k</b> ) (two diastereoisomers).....                                                             | 388       |
| 5.8. (2 <i>R</i> ,3 <i>R</i> ,4 <i>S</i> ,5 <i>R</i> ,6 <i>S</i> )-2-(acetoxymethyl)-6-((3-(benzoyloxy)prop-1-en-1-yl)thio)tetrahydro-2 <i>H</i> -pyran-3,4,5-triyl triacetate ( <b>17l</b> ) (two diastereoisomers) .....                                           | 39        |
| 5.9. 1-benzyl 4-(3-(((2 <i>S</i> ,3 <i>R</i> ,4 <i>S</i> ,5 <i>R</i> ,6 <i>R</i> )-3,4,5-triacetoxy-6-(acetoxymethyl)tetrahydro-2 <i>H</i> -pyran-2-yl)thio)allyl) ( <i>tert</i> -butoxycarbonyl)- <i>L</i> -aspartate ( <b>17n</b> ) (two diastereoisomers).....    | 40        |
| 5.10. 1-(4-phenylbut-3-yn-1-yl)-4-(trifluoromethyl)benzene ( <b>20c</b> ).....                                                                                                                                                                                       | 41        |
| 5.11. 1-(5-phenylpent-1-yn-1-yl)naphthalene ( <b>20f</b> ) .....                                                                                                                                                                                                     | 43        |
| 5.12. <i>tert</i> -butyldimethyl(3-(4-(4-(trifluoromethyl)phenyl)but-1-yn-1-yl)phenoxy)silane ( <b>20h</b> ) .....                                                                                                                                                   | 44        |
| 5.13. 3-(5-phenylpent-1-yn-1-yl)phenyl (4 <i>R</i> )-4-(((5 <i>S</i> ,9 <i>S</i> ,10 <i>S</i> ,13 <i>R</i> ,14 <i>R</i> ,17 <i>R</i> )-10,13-dimethyl-3,7,12-trioxohexadecahydro-1 <i>H</i> -cyclopenta[ <i>a</i> ]phenanthren-17-yl)pentanoate ( <b>20l</b> ) ..... | 46        |
| 5.14. 3-(5-phenylpent-1-yn-1-yl)phenyl 2-(1-(4-chlorobenzoyl)-5-methoxy-2-methyl-1 <i>H</i> -indol-3-yl)acetate ( <b>20n</b> ) .....                                                                                                                                 | 47        |

## 1. General Information

### Materials

All solvents and commercially available reagents were purchased from Sigma-Aldrich, TCI, or Acros Organics as reagent grade and were used without further purification, unless otherwise stated. Porphyrins were purchased from PorphyChem. Dry solvents were taken from Solvent Purification System (SPS) or purchased from Sigma Aldrich. All deuterated solvents used were purchased from Eurisotop.

### General Procedures

All the photochemical reactions were performed in 10 mL glassy vials sealed with aluminum caps containing a rubber septum. Reactions were monitored by thin layer chromatography (TLC), using 0.20 mm Merck silica plates (60F-254) and visualized using UV-light, potassium permanganate, cerium molybdate, or anisaldehyde stain, with heat as a developing agent. Chromatography columns were performed on Merck silica gel 60 (230-400 mesh). GC yields were calibrated with dodecane as an internal standard. Isolated yields refer to spectroscopically ( $^1\text{H}$  NMR) homogeneous materials.

### Instrumentation

**NMR spectra** were recorded at ambient temperature (unless otherwise stated) on Bruker 400 or 500 MHz and Varian 500 or 600 MHz. Chemical shifts are reported in ppm relative to the tetramethyl silane signal or solvent peak (TMS: 0 ppm for  $^1\text{H}$  and  $^{13}\text{C}$ ,  $\text{CHCl}_3$ : 7.26 ppm for  $^1\text{H}$  and 77.00 ppm for  $^{13}\text{C}$ ). Multiplicities are given as: singlet (s), doublet (d), triplet (t), quartet (q), pentet (p), multiplet (m), broad singlet (brs).

**LR and HRMS** Low-resolution mass spectra (LRMS) were recorded on an Applied Biosystems API 365 mass spectrometer using electrospray ionization (ESI) technique. High-resolution mass spectra (HRMS) were recorded on Waters SYNAPT G2-S HDMS instrument using electron ionization (EI), electrospray ionization (ESI), or atmospheric-pressure chemical ionization (APCI) with time of flight detector (TOF).

**Elemental analyses** (C, H, N) were performed using a PERKIN-ELMER 240 Elemental Analyzer.

**GC-MS analyses** were performed using Shimadzu GCMS-QP2010 SE gas chromatograph with FID detector and Zebron ZB 5MSi column.

**HPLC analyses** were performed using KNAUER, Eurospher II 100-10 Si, 250 x 4 mm column with precolumn, using UV-Vis detection (wavelength: 270 nm) at room temperature. Flow rate: 1mL/min, elution: hexane/ethyl acetate.

## 2. Photoreactor Setups

Light-mediated reactions were carried out in UOSlab Miniphoto photoreactor. Red (maximum at 660 nm) light was supplied to each reaction vial with the use of 7 LUMINUS LED units (of overall 25 W intensity when 100% power applied). The ambient temperature of LED block was maintained by cooling with Huber MiniChiller 300.

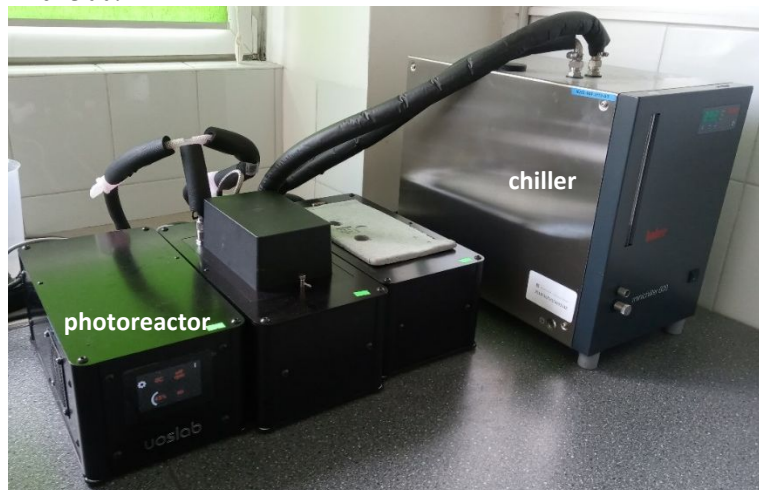

**Figure S1.** Standard photoreactor setup with chiller.

### 3. Porphyrins as photoreductants in red-light catalysis – oxidative quenching catalytic cycles

#### 3.1 Arylation reactions

##### General procedure for arylation of furan:<sup>1</sup>

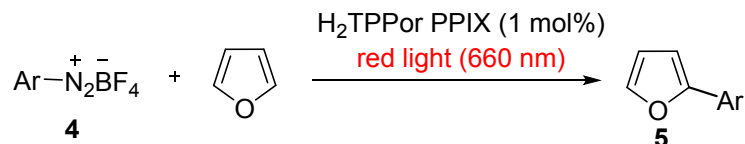

A porphyrin (1 mol%, a) H<sub>2</sub>TPP<sub>F</sub> (2) or b) PPIX (3) and a diazonium salt (0.2 mmol, 1 equiv.) were placed in a 10 mL vial with a septum, dissolved in dry DMSO (1 mL), degassed followed by the addition of furan (10 equiv.). The reaction mixture was stirred under light irradiation (red light, 100% power, 15 °C) for 16 h under argon atmosphere. The light was turned off, the reaction mixture was diluted with AcOEt, and washed with water. The aqueous phase was extracted with AcOEt three times. The combined organic phases were washed with water and brine, dried over Na<sub>2</sub>SO<sub>4</sub>, filtered, and concentrated. The crude product was purified by flash chromatography using silica gel (hexane/AcOEt).

##### 2-(4-bromophenyl)furan (5)

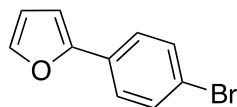

The crude product was purified by column chromatography using silica gel (hexane/AcOEt) to afford 26 mg of compound 5 as white solid, yield = 60% for H<sub>2</sub>TPP<sub>F</sub> and 60% for PPIX, 16 h. Analytical data for compound 5 are in agreement with the literature data.<sup>2</sup>

<sup>1</sup>H NMR (400 MHz, CDCl<sub>3</sub>) δ = 7.54-7.46 (m, 5H), 6.65-6.64 (dd, *J* = 3.4 Hz, *J* = 0.8 Hz, 1H), 6.47-6.46 (dd, *J* = 3.4 Hz, *J* = 1.8 Hz, 1H) ppm.

<sup>13</sup>C{H} NMR (100 MHz, CDCl<sub>3</sub>) δ = 153.0, 142.4, 131.8, 129.8, 125.3, 124.1, 111.8, 105.5 ppm.

##### General procedure for arylation of coumarine:<sup>1</sup>

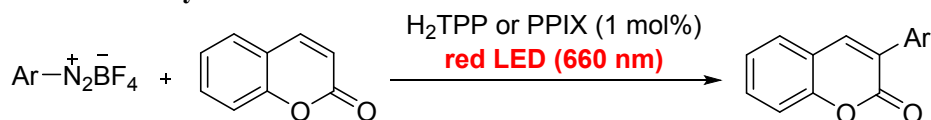

A photocatalyst (1 mol%, a) H<sub>2</sub>TPP<sub>F</sub> (2) or b) PPIX (3), diazonium salt (0.2 mmol, 1 equiv.) coumarine (5 equiv.) were placed in a 10 mL vial with a septum, dissolved in dry DMSO (2 mL) and degassed for 10 min. The reaction mixture was stirred under light irradiation (red light, 100% power, 15 °C) for 17 h under argon atmosphere. The light was turned off, the reaction mixture was diluted with AcOEt, and washed with water. The aqueous phase was extracted with AcOEt three times. The combined organic phases were washed with water and brine, dried over Na<sub>2</sub>SO<sub>4</sub>, filtered, and concentrated. The crude product was purified by flash chromatography using silica gel (hexane/AcOEt).

<sup>1</sup> Modified procedure from: Rybicka-Jasińska, K.; König, B.; Gryko, D. *Eur. J. Org. Chem.*, **2016**, 2104–2107.

<sup>2</sup> Hari, D. P.; Schroll, P.; König, B. *J. Am. Chem. Soc.* **2012**, *134*, 2958–2961.

### 3-(4-bromophenyl)-2H-chromen-2-one (6)

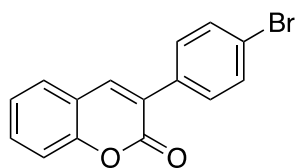

The crude product was purified by column chromatography using silica gel (hexane/AcOEt) to afford 36 mg of compound **6** as white solid, yield = **60%** for H<sub>2</sub>TPP<sub>F</sub> and **35%** (20 mg) for PPIX, 17 h. Analytical data for compound **6** are in agreement with the literature data.<sup>3</sup>

<sup>1</sup>H NMR (400 MHz, CDCl<sub>3</sub>) δ = 7.81 (s, 1H), 7.61-7.52 (m, 6H), 7.39-7.36 (m, 1H), 7.32-2.28 (m, 1H) ppm.

<sup>13</sup>C{<sup>1</sup>H} NMR (100 MHz, CDCl<sub>3</sub>) δ = 160.2, 153.6, 139.9, 133.6, 131.7, 131.7, 130.1, 127.9, 127.2, 124.6, 123.2, 119.5, 116.5 ppm.

### General procedure for arylation of thiol:<sup>4</sup>

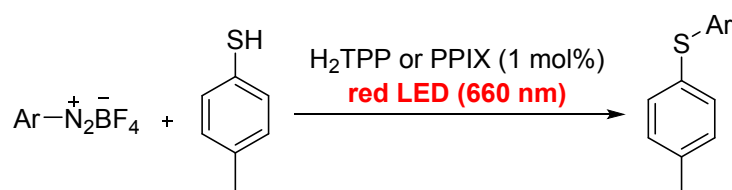

A photocatalyst (1 mol%, a) H<sub>2</sub>TPP<sub>F</sub> (**2**) or b) PPIX (**3**), diazonium salt (0.2 mmol, 1 equiv.) were placed in a 10 mL vial with a septum, dissolved in dry DMSO (4 mL), degassed followed by the addition of thiol (1.1 equiv.). The reaction mixture was stirred under light irradiation (red light, 100% power, 15 °C) for 6 h under argon atmosphere. The light was turned off, the reaction mixture was diluted with AcOEt, and washed with water. The aqueous phase was extracted with AcOEt three times. The combined organic phases were washed with water and brine, dried over Na<sub>2</sub>SO<sub>4</sub>, filtered, and concentrated. The crude product was purified by flash chromatography using silica gel (hexane/AcOEt).

### (4-bromophenyl)(p-tolyl)sulfane (7)

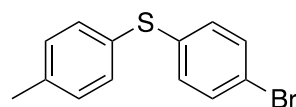

The crude product was purified by column chromatography using silica gel (hexane/AcOEt) to afford 41 mg of compound **7** as white solid, yield = **60%** for H<sub>2</sub>TPP<sub>F</sub> and **59%** (40 mg) for PPIX, 6 h. Analytical data for compound **7** are in agreement with the literature data.<sup>4</sup>

<sup>1</sup>H NMR (500 MHz, CDCl<sub>3</sub>) δ 7.36 (d, *J* = 8.5 Hz, 2H), 7.30 (d, *J* = 8.0 Hz, 2H), 7.14 (d, *J* = 7.8 Hz, 2H), 7.10 (d, *J* = 9.5 Hz, 2H), 2.35 (s, 3H) ppm.

<sup>13</sup>C{<sup>1</sup>H} NMR (126 MHz, CDCl<sub>3</sub>) δ 138.1, 136.8, 132.7, 132.0, 130.9, 130.4, 130.2, 120.1, 21.13 ppm.

<sup>3</sup> Yuan, J.-W.; Yang, L.-R.; Yin, Q.-Y.; Mao, P.; Qu, L.-B. *RSC Adv.* **2016**, *6*, 35936–35944.

<sup>4</sup> Modified procedure from: Bottecchia, C.; Rubens, M.; Gunnoo, S. B.; Hessel, V.; Madder, A; Noël, T. *Angew. Chem. Int. Ed.*, **2017**, *56*, 12702–12707.

### General procedure for the synthesis of substituted-(phenyl)selene or substituted-(phenyl)sulfane:<sup>5</sup>

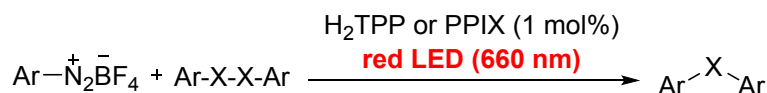

A photocatalyst (1 mol%, a) H<sub>2</sub>TPP<sub>F</sub> (**2**) or b) PPIX (**3**), diazonium salt (**4**, 0.2 mmol, 1 equiv.) were placed in a 10 mL vial with a septum, dissolved in dry DMSO (2 mL), degassed followed by the addition of diphenyl diselenide (2 equiv.) or diphenyl disulfide (2 equiv.). The reaction mixture was stirred under light irradiation (red light, 100% power, 15 °C) for 6 h under argon atmosphere. The light was turned off, the reaction mixture was diluted with AcOEt, and washed with water. The aqueous phase was extracted with AcOEt three times. The combined organic phases were washed with water and brine, dried over Na<sub>2</sub>SO<sub>4</sub>, filtered, and concentrated. The crude product was purified by flash chromatography using silica gel (hexane/AcOEt).

#### (4-bromophenyl)(p-tolyl)sulfane (**7**)

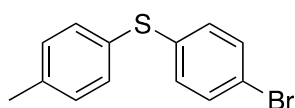

The crude product was purified by column chromatography using silica gel (hexane/AcOEt) to afford 41 mg of compound **7** as white solid, yield = **74%** for H<sub>2</sub>TPP<sub>F</sub> and **24%** (43 mg) for PPIX, 6 h. Analytical data for compound **7** are in agreement with the literature data.<sup>4</sup>

#### (4-bromophenyl)(phenyl)selane (**8**)

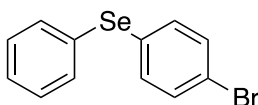

The crude product was purified by column chromatography using silica gel (hexane/AcOEt) to afford 53 mg of compound **8** as colorless oil, yield = **88%** for H<sub>2</sub>TPP<sub>F</sub> and **81%** (48 mg) for PPIX, 6 h. Analytical data for compound **8** are in agreement with the literature data.<sup>4</sup>

<sup>1</sup>H NMR (500 MHz, CDCl<sub>3</sub>) δ = δ 7.50 – 7.42 (m, 2H), 7.40 – 7.32 (m, 2H), 7.32 – 7.24 (m, 5H) ppm.

<sup>13</sup>C{<sup>1</sup>H} NMR (126 MHz, CDCl<sub>3</sub>) δ 134.2, 133.3, 132.4, 130.4, 130.4, 129.5, 127.7, 121.5 ppm.

### General procedure oxidant- and base-free Porphyrin/Pd catalyzed C–H arylation of anilides:<sup>6</sup>

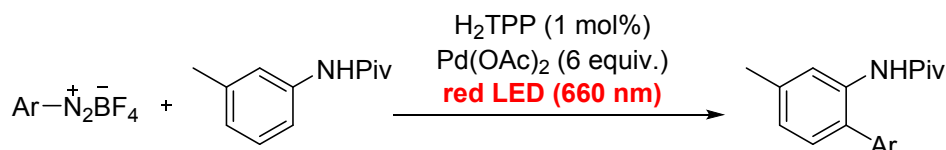

A vial with a septum was charged with a photocatalyst (1 mol%, a) H<sub>2</sub>TPP<sub>F</sub> (**1**) or b) PPIX (**3**), pivalamid (0.2 mmol, 1 equiv.), aryldiazonium salt **4** (0.3 mmol), Pd(OAc)<sub>2</sub> (10 mol%) and methanol (1 mL) under argon atmosphere. Then the reaction tube was frozen in liquid N<sub>2</sub>, degassed by the freeze-pump-thaw procedure (3x), refilled with argon gas. The reaction mixture was stirred under light irradiation (red light, 100% power, 15 °C) for 16 h under argon atmosphere. The light was turned off, the reaction mixture was diluted with AcOEt, and washed with water. The aqueous phase was extracted with AcOEt three times. The combined organic phases were washed with water and brine, dried over

<sup>5</sup> Modified procedure from: Mandal, T.; Das, S.; De Sarkar, S., *Adv. Synth. Catal.*, **2019**, *361*, 3200–3209.

<sup>6</sup> Modified procedure from: Sahoo, M. K.; Midya, S. P.; Landge, V. G.; Balaraman, E. *Green Chem.* **2017**, *19*, 2111–2117.

Na<sub>2</sub>SO<sub>4</sub>, filtered, and concentrated. The crude product was purified by flash chromatography using silica gel (hexane/AcOEt).

#### *N*-(4'-bromo-4-methyl-[1,1'-biphenyl]-2-yl)pivalamide (**9**)

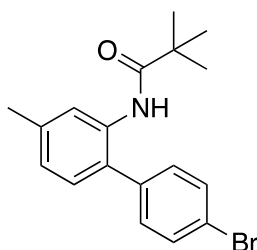

The crude product was purified by column chromatography using silica gel (hexane/AcOEt) to afford 62 mg of compound **9** as white solid, yield = **89%** for H<sub>2</sub>TPP<sub>F</sub> and **78%** (54 mg) for PPIX, 16 h. Analytical data for compound **9** are in agreement with the literature data.<sup>6</sup>

<sup>1</sup>H NMR (500 MHz, CDCl<sub>3</sub>) δ 8.16 – 8.12 (m, 1H), 7.62 – 7.57 (m, 2H), 7.31 (s, 1H), 7.24 – 7.18 (m, 2H), 7.09 (d, *J* = 7.7 Hz, 1H), 7.02 – 6.94 (m, 1H), 2.39 (s, 3H), 1.13 (s, 9H) ppm.

<sup>13</sup>C{H} NMR (126 MHz, CDCl<sub>3</sub>) δ 176.3, 138.9, 137.2, 134.6, 132.1, 131.1, 129.5, 128.5, 125.0, 122.2, 122.0, 39.8, 27.4, 21.4 ppm.

### 3.2 Photocatalytic hydrogenation of nitrobenzenes<sup>7</sup>

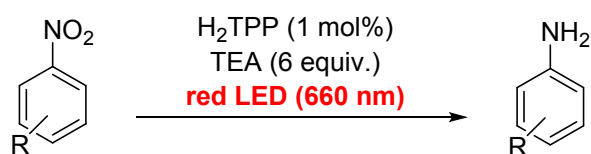

**General Procedure:**<sup>7</sup> A vial with a septum was charged with a photocatalyst (H<sub>2</sub>TPP, 1 mol%), nitrobenzene (0.2 mmol, 1 equiv.), EtOH (3 mL), water (2 mL) and trietanolamine (6 equiv.). The pH value of the solution was adjusted to 8.50 using concentrated HCl solution. Before irradiation, the sample was deaerated by bubbling argon for 10 min. The reaction mixture was stirred under light irradiation (red light, 100% power, 15 °C) for 24 h under argon atmosphere. The light was turned off, the reaction mixture was diluted with AcOEt, and washed with water. The aqueous phase was extracted with AcOEt three times. The combined organic phases were washed with water and brine, dried over Na<sub>2</sub>SO<sub>4</sub>, filtered, and concentrated. The crude product was purified by flash chromatography using silica gel (hexane/AcOEt).

#### *Aniline* (**10**)

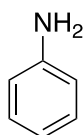

The crude product was purified by column chromatography using silica gel (hexane/AcOEt) to afford 14 mg of compound **10** as yellow oil, yield = **75%** for H<sub>2</sub>TPP, 24 h. Analytical data for compound **10** are in agreement with the literature data.<sup>8</sup>

<sup>1</sup>H NMR (400 MHz, CDCl<sub>3</sub>) δ 7.24 – 7.16 (m, 2H), 6.81 (tt, *J* = 7.3, 1.1 Hz, 1H), 6.76 – 6.67 (m, 2H), 3.65 (s, 2H) ppm.

<sup>13</sup>C{H} NMR (100 MHz, CDCl<sub>3</sub>) δ 146.5, 129.3, 118.6, 115.2 ppm.

<sup>7</sup> Modified procedure from: Yang, X.-J.; Chen, B.; Wu, L.-Q.; Tung, C.-H. *Green Chem.* **2014**, *16*, 1082–1086.

<sup>8</sup> Redwan, I. N.; Grötli, M. *J. Org. Chem.* **2012**, *77*, 7071–7075.





*N*-(4-aminophenyl)-2-propylpentanamide (**11**)

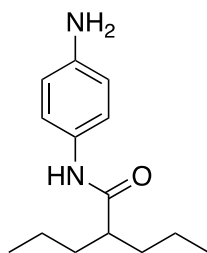

The crude product was purified by column chromatography using silica gel (hexane/AcOEt) to afford 46 mg of compound **11** as white solid, yield = **50%** for H<sub>2</sub>TPP, 24 h.

<sup>1</sup>H NMR (400 MHz, CDCl<sub>3</sub>) δ 7.34 – 7.21 (m, 2H), 7.03 (s, 1H), 6.72 – 6.57 (m, 2H), 3.68 – 3.50 (m, 2H), 2.14 (m, 1H), 1.68 (m, 3H), 1.55 – 1.22 (m, 7H), 0.91 (t, *J* = 7.2 Hz, 7H) ppm.

<sup>13</sup>C{H} NMR (100 MHz, CDCl<sub>3</sub>) δ 174.1, 143.2, 129.3, 122.0, 115.3, 48.6, 35.4, 20.9, 14.1 ppm.

HRMS (ESI): *m/z* calcd for [C<sub>14</sub>H<sub>22</sub>N<sub>2</sub>O<sub>5</sub> + H]<sup>+</sup>: 235.1810 [*M*+H]<sup>+</sup>; found 235.1814.

IR (film, cm<sup>-1</sup>): 3273, 2955, 1650, 1531, 1254.

Anal. Calcd for C<sub>14</sub>H<sub>22</sub>N<sub>2</sub>O: C, 71.76; H 9.46. Found: C, 71.71; H 9.43.

## 4. Porphyrins as photooxidants red-light catalysis – reductive quenching catalytic cycles

### 4.1 $\alpha$ -Functionalization of aldehydes with diazo esters

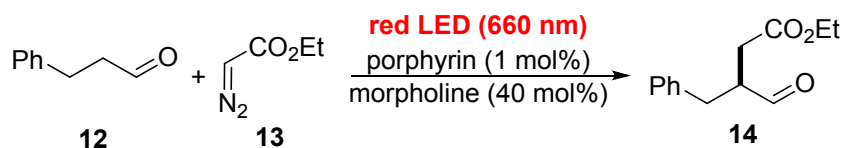

**General procedure:**<sup>9</sup> A photocatalyst ( $\text{H}_2\text{TPP}$ , 1 mol%) was placed in a 10 mL vial with a septum and dissolved in a mixture of DMSO and buffer PBS = 4 (mixture 1.3:0.3, 1.6 mL) then an aldehyde (0.15 mmol, 1.25 equiv.), piperazine (0.4 equiv., 0.04 mmol) and EDA (0.1 mmol, 1 equiv.) were added. The reaction mixture was stirred under light irradiation (red light, 50% power, 15 °C) for 16 h. The light was turned off, the reaction mixture was diluted with AcOEt, and washed with 1M HCl. The aqueous phase was extracted with AcOEt three times. The combined organic phases were washed with saturated  $\text{NaHCO}_{3\text{aq}}$ , brine, dried over  $\text{Na}_2\text{SO}_4$ , filtered, and concentrated. The crude product was purified by flash chromatography using silica gel (hexanes/AcOEt).

#### *Ethyl 3-benzyl-4-oxobutanoate (14)*

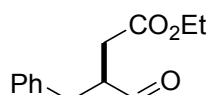

Following the general procedure: compound **14** was obtained from 3-phenylpropanal (**12**, 0.1 mmol) and ethyl diazoacetate (**13**, 0.2 mmol). The crude product was purified by column chromatography using silica gel (hexane/AcOEt) to afford 16 mg of compound **14** as colorless oil, yield = **75%** for  $\text{H}_2\text{TPP}$  and **70%** (14 mg) for PPIX, 16 h). Analytical data for compound **14** are in agreement with the literature data.<sup>9</sup>

**$^1\text{H NMR}$**  (500 MHz,  $\text{CDCl}_3$ )  $\delta$  9.79 (s, 1H), 7.31 – 7.17 (m, 5H), 4.11 (q,  $J = 7.1$  Hz, 2H), 3.14 – 3.08 (m, 2H), 2.77 – 2.71 (m, 1H), 2.65 (dd,  $J = 7.6$  Hz, 1H), 1.40 (dd,  $J = 4.8$  Hz, 1H), 1.23 (t,  $J = 7.0$  Hz, 3H) ppm.

**$^{13}\text{C}\{\text{H}\}$  NMR** (100 MHz,  $\text{CDCl}_3$ )  $\delta$  202.2, 171.6, 137.7, 129.0, 128.6, 126.7, 60.7, 49.2, 34.6, 32.7, 14.1 ppm.

### 4.2. Photocatalytic thiol-ene reaction

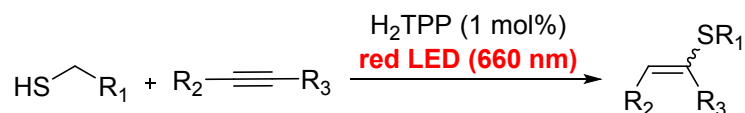

**General procedure:** A photocatalyst ( $\text{H}_2\text{TPP}$  or PPIX, 1 mol%) was placed in a 10 mL vial with a septum and dissolved in DMSO then thiol (0.1 mmol, 1 equiv.) and alkyne (0.2 mmol, 2 equiv.) were added. The reaction mixture was stirred under light irradiation (red light, 100% power, 15 °C) for specific amount of time. The light was turned off, the reaction mixture was diluted with AcOEt, and washed with water. The aqueous phase was extracted with AcOEt three times. The combined organic phases were washed with water and brine, dried over  $\text{Na}_2\text{SO}_4$ , filtered, and concentrated. The crude product was purified by flash chromatography using silica gel (hexane/AcOEt).

<sup>9</sup> Modified procedure from: Rybicka-Jasińska, K.; Shan, W.; Zawada, K.; Kadish, K. M.; Gryko, D. *J. Am. Chem. Soc.* **2016**, *138*, 15451–15458.

**Optimization studies:**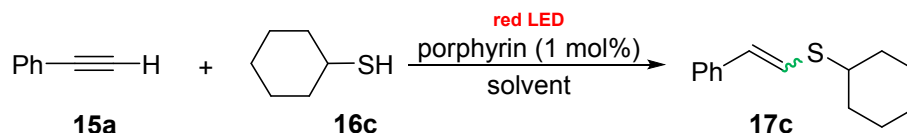*Table S1. Background reactions.*

| Entry | Change of Conditions       | Yield [%]* |
|-------|----------------------------|------------|
| 1     | -                          | 45         |
| 2     | degassed with Ar           | 26         |
| 3     | no light                   | 11         |
| 4     | no photocatalyst           | 13         |
| 5     | no light, no photocatalyst | <5         |

**Reaction conditions:** thiol (**16c**, 0.2 mmol, 1.0 equiv.), alkyne (**15a**, 1.0 equiv.), photocatalyst: H<sub>2</sub>TPP, MeOH:DCE (v/v:2:1, 1 mL), air atmosphere, 16 h, LED<sub>red</sub> (3 W). \*GC yields

*Table S2. Optimization of the substrates' ratio.*

| Entry | thiol [1, equiv.] : alkyne [2, equiv.] | Yield [%] |
|-------|----------------------------------------|-----------|
| 1     | 1.0 : 1.0                              | 46        |
| 2     | 1.0 : 1.2                              | 56        |
| 3     | 1.0 : 1.5                              | 59        |
| 4     | 1.0 : 2.0                              | 66        |
| 5     | 1.2 : 1.0                              | 60        |
| 6     | 1.5 : 1.0                              | 49        |
| 7     | 2.0 : 1.0                              | 48        |

**Reaction conditions:** thiol (**16c**, xx equiv.), alkyne (**15a**, xx equiv.), photocatalyst: H<sub>2</sub>TPP (1 mol%), MeOH:DCE (v/v:2:1, 1 mL), air atmosphere, 16 h, LED<sub>red</sub> (3 W). \*GC yields

*Table S3. Optimization of a solvent.*

| Entry | Solvent | Yield [%] |
|-------|---------|-----------|
| 1     | MeOH    | 44        |
| 2     | DCE     | 42        |
| 3     | DCM     | 59        |
| 4     | THF     | 71        |
| 5     | DMF     | 56        |
| 6     | EtOH    | 59        |
| 7     | DMSO    | 69        |

**Reaction conditions:** thiol (**16c**, 0.2 mmol, 1.0 equiv.), alkyne (**15a**, 2.0 equiv.), photocatalyst: H<sub>2</sub>TPP (1 mol%), solvent (1 mL), air atmosphere, 16 h, LED<sub>red</sub> (3 W). \*GC yields

*Table S4. Optimization of time vs LED power.*

| Entry | time | LED power | Yield [%]* |
|-------|------|-----------|------------|
| 1     | 16 h | 3 W       | 71         |
| 2     | 1 h  | 25 W      | 76         |
| 3     | 1 h  | 25 W      | 85**       |

**Reaction conditions:** thiol (**1**, 0.2 mmol, 1.0 equiv.), alkyne (**2**, 2.0 equiv.), photocatalyst: H<sub>2</sub>TPP (1 mol%), THF (1 mL), air atmosphere, xx h, LED<sub>red</sub> (x W). \*GC yields \*\* DMSO instead of THF was used

Table S5. Optimization of photocatalyst.

| Entry | Porphyrin                           | Yield [%]* |
|-------|-------------------------------------|------------|
| 1     | H <sub>2</sub> TPP                  | 85         |
| 2     | H <sub>2</sub> TP( <i>p</i> -OMe)PP | 77         |
| 3     | H <sub>2</sub> TP( <i>p</i> -OH)PP  | 81         |
| 2     | PPIX                                | 83         |
| 3     | Zn-PPIX                             | 77         |

**Reaction conditions:** thiol (**16c**, 0.2 mmol, 1.0 equiv.), alkyne (**15a**, 2.0 equiv.), photocatalyst: porphyrin (1 mol%), DMSO (1 mL), air atmosphere, 1 h, LED<sub>red</sub> (40W). \*GC yields

Table S6. Influence of co-catalyst.

| Entry | co-catalyst         | Additive [equiv.] | Yield [%]* |
|-------|---------------------|-------------------|------------|
| 1     | <i>p</i> -toluidine | 0.5               | <95        |
| 2     | <i>p</i> -toluidine | 0.4               | 94         |
| 3     | <i>p</i> -toluidine | 0.2               | 75         |
| 2     | <i>p</i> -toluidine | 0.5               | <95**      |

**Reaction conditions:** thiol (**16c**, 0.2 mmol, 1.0 equiv.), alkyne (**15a**, 1.0 equiv.), photocatalyst: PPIX (1 mol%), DMSO (1 mL), air atmosphere, 1 h, LED<sub>red</sub> (25 W). \*GC yields \*\* H<sub>2</sub>TPP was used as photocatalyst.

#### Scope and limitations studies:

##### Benzyl(styryl)sulfane (**17a**) (two diastereoisomers)

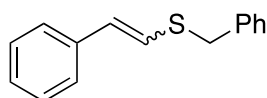

Following the general procedure, compound **17a** was obtained from phenylacetylene (0.2 mmol) and benzylthiol (0.1 mmol). The crude product was purified by column chromatography to using silica gel (hexane/AcOEt) afford 15 mg of compound **17a** as a mixture of two diastereoisomers (*Z/E* = 66:34 for H<sub>2</sub>TPP) (yellowish oil, yield = 64% for H<sub>2</sub>TPP, yield = 69% (16 mg) for PPIX, 3 h). Analytical data for compound **17a** are in agreement with the literature data.<sup>10</sup>

<sup>1</sup>H NMR (500 MHz, CDCl<sub>3</sub>) δ 7.47 – 7.43 (m, 1H + *E*), 7.41 – 7.31 (m, 6H + *E*), 7.26 (m, 2H + *E*), 7.22 – 7.13 (m, 1H + *E*), 6.71 (d, *J* = 15.5 Hz, 1H), 6.52 (d, *J* = 15.5 Hz, 1H), 6.41 (d, *J* = 10.9 Hz, 1H), 6.24 (d, *J* = 10.9 Hz, 1H), 4.00 (s, 2H), 3.99 (s, 2H) ppm.

<sup>13</sup>C{<sup>1</sup>H} NMR (126 MHz, CDCl<sub>3</sub>) δ 137.4, 137.2, 136.9, 136.9, 128.9, 128.8, 128.7, 128.7, 128.7, 128.6, 128.2, 128.0, 127.4, 127.3, 127.0, 126.7, 126.0, 125.9, 125.6, 124.4, 39.5, 37.4 ppm.

##### Phenethyl(styryl)sulfane (**17b**) (two diastereoisomers)

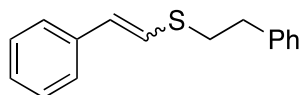

Following the general procedure, compound **17b** was obtained from phenylacetylene (0.2 mmol) and 2-phenylethanethiol (0.1 mmol). The crude product was purified by column chromatography using silica gel (hexane/AcOEt) to afford 16 mg of compound **17b** as a mixture of two diastereoisomers (*Z/E* = 63:37 for H<sub>2</sub>TPP) (yellowish oil, yield = 67% for H<sub>2</sub>TPP, yield = 63% (15 mg) for PPIX, 3 h). Analytical data for compound **17b** are in agreement with the literature data.<sup>11</sup>

<sup>10</sup> Castoldi, L.; Di Tommaso, E. M.; Gräfen, B.; Olofsson, B.; Reitti, M. *Angew. Chem. Int. Ed.* **2020**, *59*, 15512–15516.

<sup>11</sup> Ranjit, S.; Duan, Z.; Zhang, P.; Liu, X. *Org. Lett.* **2010**, *12*, 4134–4136.

$^1\text{H NMR}$  (500 MHz,  $\text{CDCl}_3$ )  $\delta$  7.50 – 7.44 (m, 1H + *E*), 7.39 – 7.27 (m, 9H), 7.26 – 7.16 (m, 9H), 6.69 (d,  $J = 15.5$  Hz, 1H), 6.49 (d,  $J = 15.6$  Hz, 1H), 6.46 (d,  $J = 10.8$  Hz, 1H), 6.24 (d,  $J = 10.8$  Hz, 1H), 3.12 – 2.87 (m, 4H + *E*) ppm.

$^{13}\text{C}\{\text{H}\}$  NMR (126 MHz,  $\text{CDCl}_3$ )  $\delta$  140.0, 139.8, 137.0, 136.9, 128.6, 128.6, 128.6, 128.6, 128.5, 128.5, 128.2, 127.4, 127.0, 126.9, 126.7, 126.5, 126.5, 126.4, 125.9, 125.5, 124.7, 40.2, 37.1, 36.8, 35.9, 35.7, 34.0 ppm.

*Cyclohexyl(styryl)sulfane (17c) (two diastereoisomers)*

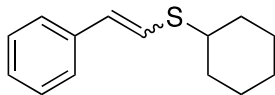

Following the general procedure, compound **17c** was obtained from phenylacetylene (0.2 mmol) and cyclohexanethiol (0.1 mmol). The crude product was purified by column chromatography using silica gel (hexane/AcOEt) to afford 19 mg of compound **17c** as a mixture of two diastereoisomers ( $Z/E = 76:24$  for  $\text{H}_2\text{TPP}$ ) (yellowish oil, yield = **85%** for  $\text{H}_2\text{TPP}$ , yield = **83%** (18 mg) for PPIX, yield **95%** (21 mg) for PPIX/*p*-toluidine, 1 h). Analytical data for compound **17c** are in agreement with the literature data.<sup>12</sup>

$^1\text{H NMR}$  (500 MHz,  $\text{CDCl}_3$ )  $\delta$  7.53 – 7.44 (m, 2H + *E*), 7.34 (t,  $J = 7.8$  Hz, 2H + *E*), 7.32 – 7.27 (m, 1H + *E*), 7.23 – 7.14 (m, 1H), 6.75 (d,  $J = 16.0$  Hz, 1H), 6.57 (d,  $J = 15.5$  Hz, 1H), 6.42 (d,  $J = 11.0$  Hz, 1H), 6.33 (d,  $J = 11.0$  Hz, 1H), 2.98 (m, 1H), 2.88 (m, 1H), 2.07 (m, 2H + *E*), 1.80 (m, 2H + *E*), 1.64 (m, 1H + *E*), 1.57 – 1.23 (m, 5H + *E*).

$^{13}\text{C}\{\text{H}\}$  NMR (126 MHz,  $\text{CDCl}_3$ )  $\delta$  137.2, 137.2, 128.7, 128.7, 128.6, 128.2, 126.9, 126.5, 125.9, 125.6, 125.0, 124.0, 47.8, 45.3, 33.7, 33.6, 26.0, 26.0, 25.7, 25.6 ppm.

*((1s,3s)-adamantan-1-yl)(styryl)sulfane (17d) (two diastereoisomers)*

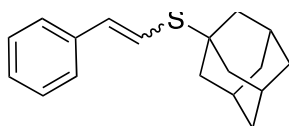

Following the general procedure, compound **17d** was obtained from phenylacetylene (0.2 mmol) and 1-adamantanethiol (0.1 mmol). The crude product was purified by column chromatography using silica gel (hexane/AcOEt) to afford 22 mg of compound **17d** as a mixture of two diastereoisomers ( $Z/E = 86:14$  for  $\text{H}_2\text{TPP}$ ) (white solid, yield = 80% (202mg, **75% for 1 mmol scale**) for  $\text{H}_2\text{TPP}$ , yield = **80%** (22 mg) for PPIX, 3 h).

$^1\text{H NMR}$  (500 MHz,  $\text{CDCl}_3$ )  $\delta$  7.53 – 7.45 (m, 2H + *E*), 7.37 – 7.29 (m, 2H + *E*), 7.18 (t,  $J = 7.4$  Hz, 1H + *E*), 6.92 (d,  $J = 12.8$  Hz, 1H), 6.70 (d,  $J = 15.5$  Hz, 1H), 6.50 (d,  $J = 11.2$  Hz, 1H), 6.46 (d,  $J = 11.2$  Hz, 1H), 2.0.9 (m, 3H + *E*), 1.98 (brs, 6H + *E*), 1.95 (brs, 6H), 1.72 (m, 6H + *E*) ppm.

$^{13}\text{C}\{\text{H}\}$  NMR (126 MHz,  $\text{CDCl}_3$ )  $\delta$  137.3, 131.9, 128.7, 128.6, 128.1, 127.1, 126.4, 125.8, 125.2, 121.2, 120.2, 46.6, 43.7, 43.3, 36.2, 36.2, 29.8, 29.8 ppm.

HRMS (EI):  $m/z$  calcd for  $\text{C}_{18}\text{H}_{22}\text{S}$ : 270.1442 [ $M$ ]; found 270.1446.

Anal. Calcd for  $\text{C}_{18}\text{H}_{22}\text{S}$ : C, 79.94; H, 8.20; S, 11.86. Found: C, 79.95; H, 8.05; S, 12.02.

IR (film,  $\text{cm}^{-1}$ ): 3020, 2907, 1590, 1442.

*methyl N-(tert-butoxycarbonyl)-S-styryl-L-cysteinate (17e) (two diastereoisomers)*

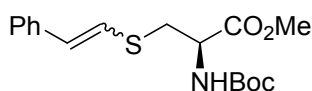

Following the general procedure, compound **17e** was obtained from phenylacetylene (0.2 mmol) and *N*-Boc-*L*-cysteine methyl ester (0.1 mmol). The crude product was purified by column chromatography

<sup>12</sup> Ananikov, V. P.; Orlov, N. V.; Beletskaya, I. P.; Khrustalev, V. N.; Antipin, M. Y.; Timofeeva, T. V. *J. Am. Chem. Soc.* **2007**, *129*, 23, 7252–7253.

using silica gel (hexane/AcOEt) to afford 25 mg of compound **17e** as a mixture of two diastereoisomers (*Z/E* = 62:38 for H<sub>2</sub>TPP) (yellowish oil, yield = 75% for H<sub>2</sub>TPP, yield = 64% (21 mg) for PPIX, 5 h). Analytical data for compound **17e** are in agreement with the literature data.<sup>13</sup>

<sup>1</sup>H NMR (500 MHz, CDCl<sub>3</sub>) δ 7.44 (m, 2H), 7.34 (m, 3H), 7.28 (m, 3H), 7.21 (m, 2H), 6.62 (d, *J* = 15.5 Hz, 1H), 5.58 (d, *J* = 15.5 Hz, 1H), 6.42 (d, *J* = 11.0 Hz, 1H), 6.15 (d, *J* = 11.0 Hz, 1H), 5.41 (brs, 1H + *E*), 4.03 (brs, 1H + *E*), 3.29 – 3.22 (m, 2H + *E*) 3.75 (s, 3H), 3.70 (s, 3H), 1.44 (s, 9H), 1.42 (s, 9H) ppm. <sup>13</sup>C{H} NMR (126 MHz, CDCl<sub>3</sub>) δ 170.9, 170.8, 154.9, 154.9, 136.5, 136.5, 129.6, 129.6, 128.6, 128.6, 128.2, 127.3, 126.8, 126.6, 126.3, 125.7, 123.9, 80.2, 80.2, 53.7, 53.5, 52.6, 38.3, 35.7, 28.2, 28.2 ppm. HRMS (ESI): *m/z* calcd for C<sub>17</sub>H<sub>23</sub>NO<sub>4</sub>SNa: 360.1246 [*M*+*Na*]<sup>+</sup>; found 360.1245.

#### *methyl N-(tert-butoxycarbonyl)-S-styryl-L-cysteinyl-L-phenylalaninate (17f)*

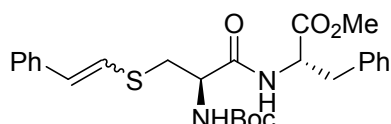

Following the general procedure, compound **17f** was obtained from phenylacetylene (0.2 mmol) and methyl (*tert*-butoxycarbonyl)cysteinylphenylalaninate<sup>14</sup> (0.1 mmol). The crude product was purified by column chromatography using silica gel (hexane/AcOEt) to afford 27 mg of compound **17f** (white oil, yield = 55% for H<sub>2</sub>TPP, 8 h).

<sup>1</sup>H NMR (500 MHz, CDCl<sub>3</sub>) δ 7.43 – 7.38 (m, 2H), 7.36 – 7.31 (m, 2H), 7.31 – 7.26 (m, 2H), 7.24 – 7.15 (m, 4H), 6.71 (d, *J* = 7.2 Hz, 1H), 6.34 (d, *J* = 10.7 Hz, 1H), 6.00 (d, *J* = 10.8 Hz, 1H), 4.90 (s, 1H), 4.83 (dt, *J* = 7.3, 4.7 Hz, 1H), 4.40 (s, 1H), 3.71 (s, 3H), 3.23 (d, *J* = 4.6 Hz, 2H), 3.06 (q, *J* = 6.9, 6.1 Hz, 2H), 1.38 (s, 9H) ppm.

<sup>13</sup>C{H} NMR (151 MHz, CDCl<sub>3</sub>) δ 171.0, 170.0, 155.3, 136.4, 129.3, 129.2, 128.73, 128.7, 128.5, 128.5, 128.2, 127.0, 127.0, 126.7, 126.3, 125.7, 80.3, 55.6, 52.7, 52.7, 38.0, 37.8, 28.2 ppm.

HRMS (ESI): *m/z* calcd for C<sub>26</sub>H<sub>32</sub>N<sub>2</sub>O<sub>5</sub>SNa: 507.1930 [*M*+*Na*]<sup>+</sup>; found 507.1932.

Anal. Calcd for C<sub>26</sub>H<sub>32</sub>N<sub>2</sub>O<sub>5</sub>S: C, 64.4; H, 6.66; S, 6.62; N, 5.78. Found: C, 64.37; H, 6.70; S, 6.53; N, 5.72.

IR (film, cm<sup>-1</sup>): 3305, 2978, 1744, 1662, 1522, 1249, 1169, 699.

#### *(2R,3R,4S,5R,6S)-2-(acetoxymethyl)-6-(styrylthio)tetrahydro-2H-pyran-3,4,5-triyl triacetate (17g)* (two diastereoisomers)

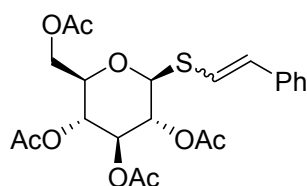

Following the general procedure, compound **17g** was obtained from acetylene (0.2 mmol) and 1-thio-β-D-glucose tetraacetate (0.1 mmol). The crude product was purified by column chromatography using silica gel (hexane/AcOEt) to afford 34 mg of compound **17g** as a mixture of two diastereoisomers (*Z/E* = 66:33 for H<sub>2</sub>TPP) (yellowish oily foam, yield = 72% for H<sub>2</sub>TPP, yield = 71% (33 mg) for PPIX, 6 h). Analytical data for compound **17g** are in agreement with the literature data.<sup>15</sup>

<sup>13</sup> Di Giuseppe, A.; Castarlenas, R.; Perez-Torrente, J.; Crusianelli, M.; Polo, V.; Sancho, R.; Lahoz, F. J.; Oro, L. A. *J. Am. Chem. Soc.* **2012**, *134*, 8171–8183.

<sup>14</sup> Synthesised according to the literature Gutierrez, A.; Marrzo, I.; Cativiela, C.; Laguna, A.; Gimeno, M. C. *Chem.-Eur. J. Chem.* **2015**, *21*, 11088–11095. Analytical data for the compound are in agreement with the literature data.

<sup>15</sup> Brachet, E.; Brion, J.-D.; Alami, M.; Messaoudi, S. *Adv. Synth. Catal.* **2013**, *355*, 2627–2636.

**<sup>1</sup>H NMR** (500 MHz, CDCl<sub>3</sub>) δ 7.42 – 7.29 (m, 3H, *Z* + *E*), 7.29 – 7.18 (m, 2H, (*Z* + *E*)), 6.75 (s, 2H), 6.61 (d, *J* = 10.8 Hz, 1H), 6.35 (d, *J* = 10.8 Hz, 1H), 5.24 (td, *J* = 9.3, 4.0 Hz, 1H + *E*), 5.18 – 5.05 (m, 2H + *E*), 4.64 (d, *J* = 9.9 Hz, 1H + *E*), 4.27 (ddd, *J* = 12.9, 8.1, 4.9 Hz, 1H + *E*), 4.19 – 4.12 (m, 1H + *E*), 3.77 (ddd, *J* = 10.0, 4.8, 2.3 Hz, 1H), 2.10 (s, 3H), 2.08 (s, 3H), 2.06 (s, 3H), 2.03 (s, 3H), 2.02 (s, 3H + *E*), 2.00 (s, 3H), 1.97 (s, 3H) ppm.

**<sup>13</sup>C{<sup>1</sup>H} NMR** (126 MHz, CDCl<sub>3</sub>) δ 170.6, 170.6, 170.1, 169.3, 169.1, 136.1, 134.8, 129.1, 128.7, 128.7, 128.3, 127.9, 127.3, 126.2, 120.2, 118.2, 84.4, 83.6, 76.7, 76.3, 76.2, 73.8, 70.0, 69.9, 68.2, 68.1, 62.1, 62.0, 20.7, 20.7, 20.6, 20.6, 20.5 ppm.

**HRMS** (ESI): *m/z* calcd for C<sub>22</sub>H<sub>26</sub>O<sub>9</sub>SNa: 489.1195 [*M*+*Na*]<sup>+</sup>; found 489.1186.

**(2*R*,3*R*,4*S*,5*R*,6*S*)-2-(acetoxymethyl)-6-((4-fluorostyryl)thio)tetrahydro-2*H*-pyran-3,4,5-triyl triacetate (**17h**) (two diastereoisomers)**

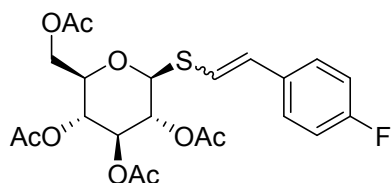

Following the general procedure with a change of stoichiometry: compound **17h** was obtained from 1-ethynyl-4-fluorobenzene (0.2 mmol) and 1-thio-β-D-glucose tetraacetate (0.1 mmol). The crude product was purified by column chromatography using silica gel (hexane/AcOEt) to afford 47 mg of compound **17h** as white oily foam **17h** as a mixture of two diastereoisomers (*Z/E* = 75:25), yield = **46%** for H<sub>2</sub>TPP, yield = **80%** (77 mg) (for H<sub>2</sub>TPP/*p*-toluidine, yield = **61%** (59 mg) for PPIX, 16 h).

**<sup>1</sup>H NMR** (400 MHz, CDCl<sub>3</sub>) δ 7.38 – 7.32 (m, 2H), 7.32 – 7.26 (m, 2H), 7.09 – 6.94 (m, 2H + *E*), 6.72 (d, *J* = 15.2.5 Hz, 1H), 6.65 (d, *J* = 16.4 Hz, 1H), 6.58 (d, *J* = 10.8 Hz, 1H), 6.32 (d, *J* = 10.8 Hz, 1H), 5.24 (m, 1H + *E*), 5.12 (m, 2H + *E*), 4.64 (d, *J* = 10.8 Hz, 1H), 4.62 (d, *J* = 9.6 Hz, 1H), 4.27 (m, 1H + *E*), 4.15 (m, 1H + *E*), 3.77 (m, 1H + *E*), 2.08 (s, 3H + *E*), 2.06 (s, 3H), 2.04 (s, 3H), 2.02 (s, 3H + *E*), 2.00 (s, 3H + *E*), 1.97 (s, 3H) ppm,

**<sup>13</sup>C{<sup>1</sup>H} NMR** (126 MHz, CDCl<sub>3</sub>) δ 170.6, 170.5, 170.1, 169.3, 169.3, 169.2, 169.1, 134.0, 132.5, 132.5, 132.3, 132.2, 128.1, 127.9, 127.8, 119.8, 119.8, 117.7, 117.7, 115.8, 115.5, 115.3, 115.1, 84.2, 83.5, 76.3, 76.2, 73.8, 69.9, 68.2, 68.1, 68.1, 62.1, 62.0, 20.7, 20.7, 20.6, 20.5, 20.5 ppm.

**<sup>19</sup>F NMR** (470 MHz, CDCl<sub>3</sub>) δ -113.5 (m), -113.8 (m).

**HRMS** (ESI): *m/z* calculated for C<sub>22</sub>H<sub>25</sub>O<sub>8</sub>NaSF: 507.1095, [*M*+*Na*]<sup>+</sup>; found = 507.1101.

**Anal.** Calcd for C<sub>22</sub>H<sub>25</sub>FO<sub>8</sub>S: C, 54.54; H, 5.20. Found: C, 54.46; H, 5.13.

**IR** (film, cm<sup>-1</sup>): 2952, 1753, 1225, 1162, 1041.

**(2*R*,3*R*,4*S*,5*R*,6*S*)-2-(acetoxymethyl)-6-((4-methoxystyryl)thio)tetrahydro-2*H*-pyran-3,4,5-triyl triacetate (**17i**) (two diastereoisomers)**

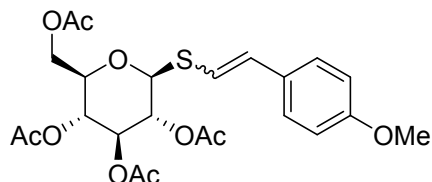

Following the general procedure with a change of stoichiometry: compound **17i** was obtained from *p*-methoxyphenylacetylene (0.2 mmol) and 1-thio-β-D-glucose tetraacetate (0.1 mmol). The crude product was purified by column chromatography using silica gel (hexane/AcOEt) to afford 36 mg of compound **17i** as white oily foam **17i** as a mixture of two diastereoisomers (*Z/E* = 66:33), yield = **65%** for H<sub>2</sub>TPP, yield = **75%** (41 mg) for H<sub>2</sub>TPP/*p*-toluidine, 6 h).

**<sup>1</sup>H NMR** (500 MHz, CDCl<sub>3</sub>) δ 7.38 – 7.32 (m, 2H), 7.32 – 7.24 (m, 2H), 6.91 – 6.83 (m, 2H + *E*), 6.74 (d, *J* = 15.0 Hz, 1H), 6.59 (d, *J* = 15.5 Hz, 1H), 6.57 (d, *J* = 10.5 Hz, 1H), 6.22 (d, *J* = 10.7 Hz, 1H), 5.28 – 5.20 (m, 1H + *E*), 5.14 (m, 2H), 4.64 (d, *J* = 10.0 Hz, 1H), 4.61 (d, *J* = 9.9 Hz, 1H), 4.27 (td, *J* =



12.0, 4.8 Hz, 1H + *E*), 4.22 – 4.11 (m, 1H + *E*), 3.81 (s, 3H + *E*), 3.78 (m, 1H + *E*), 2.09 (s, 3H), 2.07 (s, 3H), 2.05 (s, 3H), 2.03 (s, *J* = 2.4 Hz, 3H + *E*), 2.00 (s, 3H + *E*), 1.98 (s, 3H) ppm.

<sup>13</sup>C{<sup>1</sup>H} NMR (126 MHz, CDCl<sub>3</sub>) δ 170.6, 170.6, 170.1, 169.3, 169.3, 169.2, 169.1, 159.6, 158.7, 135.8, 130.1, 129.1, 128.9, 128.8, 127.6, 117.6, 115.0, 114.1, 113.7, 84.4, 83.8, 76.8, 76.2, 76.1, 73.9, 73.8, 70.0, 69.9, 68.2, 68.1, 62.1, 62.0, 55.3, 55.2, 20.7, 20.7, 20.6, 20.5, 20.5 ppm.

HRMS (ESI): *m/z* calcd for C<sub>23</sub>H<sub>28</sub>O<sub>10</sub>SNa: 519.1301 [*M*+Na]<sup>+</sup>; found 519.1299

Anal. Calcd for C<sub>23</sub>H<sub>28</sub>O<sub>10</sub>S: C, 55.64; H, 5.68. Found: C, 55.35; H, 5.73.

IR (film, cm<sup>-1</sup>): 2955, 1754, 1606, 1510, 1369, 1227, 1175, 1038.

**(2*R*,3*R*,4*S*,5*R*,6*S*)-2-(acetoxymethyl)-6-((1,2-diphenylvinyl)thio)tetrahydro-2*H*-pyran-3,4,5-triyl triacetate (17j)** (two diastereoisomers)

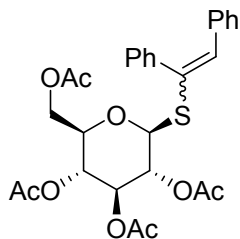

Following the general procedure: compound **17j** was obtained from diphenylacetylene (0.4 mmol) and 1-thio-β-D-glucose tetraacetate (0.2 mmol). The crude product was purified by column chromatography using silica gel (hexane/AcOEt) to afford 96 mg of compound **17j** as a white oily foam **17j** as a mixture of two diastereoisomers (*Z/E* = 50:50), yield = **88%** for H<sub>2</sub>TPP, yield = **93%** (101 mg) for H<sub>2</sub>TPP/*p*-toluidine, yield = **91%** (99 mg) for PPIX 16 h).

<sup>1</sup>H NMR (500 MHz, CDCl<sub>3</sub>, *Z/E* 1:1 mixture) δ 7.66 – 7.55 (m, 4H), 7.45 – 7.32 (m, 11H), 7.32 – 7.25 (m, 1H), 7.15 – 7.05 (m, 2H), 7.00 (s, 1H), 6.98 – 6.92 (m, 2H), 6.90 (s, 1H), 5.11 – 4.94 (m, 6H), 4.30 (d, *J* = 4.3 Hz, 1H), 4.28 (d, *J* = 4.0 Hz, 1H), 4.17 (dd, *J* = 12.3, 5.3 Hz, 1H), 4.10 (dd, *J* = 12.3, 4.8 Hz, 1H), 4.01 (dd, *J* = 12.3, 2.2 Hz, 1H), 3.95 (dd, *J* = 12.3, 2.4 Hz, 1H), 3.29 (m, 1H), 3.16 – 3.09 (m, 1H), 2.10 (s, 3H), 2.09 (s, 3H), 2.06 (s, 3H), 2.00 (s, 3H), 1.99 (s, 3H), 1.97 (s, 3H), 1.96 (s, 3H), 1.91 (s, 3H) ppm.

<sup>13</sup>C{<sup>1</sup>H} NMR (126 MHz, CDCl<sub>3</sub>) δ 170.5, 170.2, 169.3, 169.3, 169.2, 140.5, 137.1, 136.2, 136.0, 134.2, 134.1, 134.0, 131.7, 129.7, 129.7, 129.1, 128.7, 128.6, 128.5, 128.3, 128.3, 128.1, 128.1, 127.7, 127.2, 83.9, 82.9, 76.8, 75.7, 75.7, 73.9, 73.9, 70.2, 69.8, 68.3, 68.1, 62.1, 61.8, 20.7, 20.7, 20.5, 20.5, 20.5, 20.5, 20.4 ppm.

HRMS (ESI): *m/z* calculated for C<sub>28</sub>H<sub>30</sub>O<sub>9</sub>SNa: 565.1508 [*M*+Na]<sup>+</sup>; found 565.1517.

IR (film, cm<sup>-1</sup>): 3056, 1754, 1224, 1040.

HPLC: >95% purity

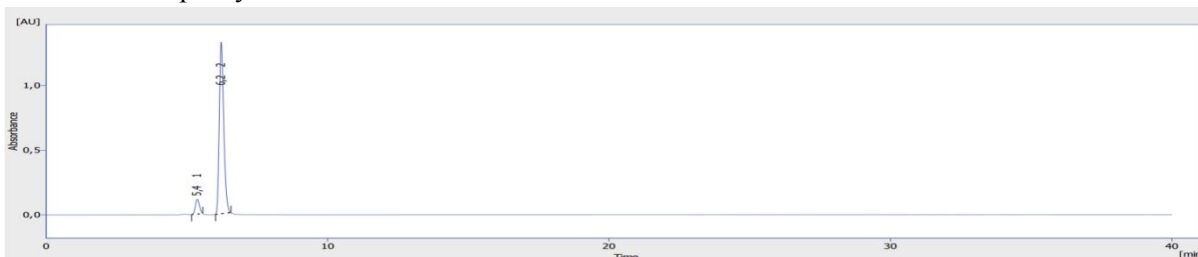

|   | Reten. Time [min] | Area [mAU.s] | Height [mAU] | Area [%] | Height [%] | W05 [min] | PDA Peak Purity | Compound Name | PDA Best Match Name | PDA Best Match |
|---|-------------------|--------------|--------------|----------|------------|-----------|-----------------|---------------|---------------------|----------------|
| 1 | 5,367             | 1145,968     | 114,627      | 7,3      | 8,0        | 0,18      | 561             |               |                     |                |
| 2 | 6,217             | 14574,606    | 1324,173     | 92,7     | 92,0       | 0,18      | 835             |               |                     |                |
|   | Total             | 15720,574    | 1438,799     | 100,0    | 100,0      |           |                 |               |                     |                |

**(2R,3R,4S,5R,6S)-2-(acetoxymethyl)-6-(oct-1-en-1-ylthio)tetrahydro-2H-pyran-3,4,5-triyl triacetate (17k) (two diastereoisomers)**

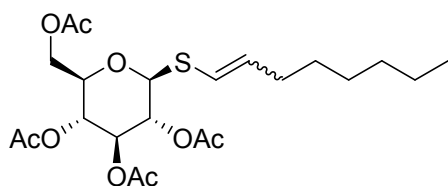

Following the general procedure: compound **17k** was obtained from oct-1-yne (0.4 mmol) and 1-thio-β-D-glucose tetraacetate (0.2 mmol). The crude product was purified by column chromatography using silica gel (hexane/AcOEt) to afford 63 mg of compound **17k** as a white oily foam **17k** as a mixture of two diastereoisomers (*Z/E* 50:50) yield = **65%** for H<sub>2</sub>TPP, yield = **75%** (72 mg) for H<sub>2</sub>TPP/*p*-toluidine, 12 h, yield = **66%** (64 mg) for PPIX, 16 h).

<sup>1</sup>H NMR (500 MHz, CDCl<sub>3</sub>) δ 6.05 (d, *J* = 9.5 Hz, 1H), 5.99 (m, 1H), 5.94 (m, 1H), 5.80 (m, 1H), 5.22 (t, *J* = 9.4 Hz, 2H (two diastereoisomers)), 5.13 – 5.03 (m, 4H (two diastereoisomers)), 4.52 (d, *J* = 10 Hz, 1H), 4.85 (d, *J* = 10 Hz, 1H), 4.29 – 4.23 (m, 2H (two diastereoisomers)), 4.15 (dd, *J* = 5.6, 2.4 Hz, 1H), 4.13 (dd, *J* = 5.6, 2.3 Hz, 1H), 3.73 (m, 2H (two diastereoisomers)), 2.14 – 2.07 (m, 3H), 2.08 (s, 6H), 2.05 (s, 6H (two diastereoisomers)), 2.02 (s, 6H (two diastereoisomers)), 2.00 (s, 6H (two diastereoisomers)), 1.43 – 1.34 (m, 4H (two diastereoisomers)), 1.34 – 1.21 (m, 13H (two diastereoisomers)), 0.88 (m, 6H (two diastereoisomers)) ppm.

<sup>13</sup>C{H} NMR (126 MHz, CDCl<sub>3</sub>) 170.6, 170.2, 169.4, 169.3, 169.1, 169.1, 140.2, 134.7, 118.0, 116.2, 83.8, 83.5, 76.8, 76.1, 76.0, 74.0, 73.9, 70.1, 69.8, 68.3, 68.2, 62.2, 62.1, 33.2, 31.6, 31.6, 29.2, 28.9, 28.8, 28.7, 28.7, 22.6, 20.7, 20.7, 20.6, 20.6, 20.6, 14.0 ppm.

HRMS (ESI): *m/z* calculated for C<sub>22</sub>H<sub>34</sub>O<sub>9</sub>SNa: 497.1821 [M+Na]<sup>+</sup>; found 497.1823

Anal. Calcd for C<sub>22</sub>H<sub>34</sub>O<sub>9</sub>S: C, 55.68; H, 7.22. Found: C, 55.78; H, 7.38.

IR (film, cm<sup>-1</sup>): 2928, 1757, 1368, 1227, 1041.

**(2R,3R,4S,5R,6S)-2-(acetoxymethyl)-6-((3-(benzyloxy)prop-1-en-1-yl)thio)tetrahydro-2H-pyran-3,4,5-triyl triacetate (17l) (two diastereoisomers)**

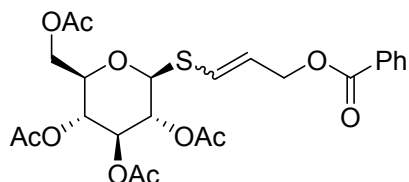

Following the general procedure: compound **17l** was obtained from propargyl benzoate (0.4 mmol) and 1-thio-β-D-glucose tetraacetate (0.2 mmol). The crude product was purified by column chromatography using silica gel (hexane/AcOEt) to afford 52 mg of compound **17l** as a white oily foam **17l** as a mixture of two diastereoisomers (*Z/E* = 50:50), yield = **53%** for H<sub>2</sub>TPP, yield = **55%** (53 mg) for H<sub>2</sub>TPP/*p*-toluidine, yield = **40%** (39 mg) for PPIX, 16 h).

<sup>1</sup>H NMR (500 MHz, CDCl<sub>3</sub>) δ 8.09 – 7.99 (m, 2H + *E*), 7.59 – 7.53 (m, 1H + *E*), 7.44 (m, 2H + *E*), 6.48 (m, 1H + *E*), 6.09 – 6.02 (m, 1H + *E*), 5.24 (td, *J* = 9.4, 3.0 Hz, 1H + *E*), 5.14 – 5.05 (m, 2H + *E*), 4.90 (dd, *J* = 6.4, 1.3 Hz, 1H + *E*), 4.84 (dt, *J* = 6.4, 1.1 Hz, 1H + *E*), 4.62 (dd, *J* = 19.1, 10.0 Hz, 1H + *E*), 4.26 (m, 1H + *E*), 4.15 (dt, *J* = 12.4, 2.2 Hz, 1H + *E*), 3.77 (m, 1H + *E*), 2.05 (s, 3H + *E*), 2.04 (s, 3H + *E*), 2.03 (s, 3H + *E*), 2.00 (s, 3H + *E*) ppm.

<sup>13</sup>C{H} NMR (126 MHz, CDCl<sub>3</sub>) δ 170.1, 170.0, 169.3, 169.1, 169.1, 166.2, 166.1, 133.0, 132.9, 129.9, 129.7, 129.6, 129.6, 128.4, 128.3, 127.6, 127.2, 124.7, 123.6, 83.4, 83.1, 76.2, 76.1, 73.7, 73.7, 69.9, 69.8, 68.1, 68.1, 64.6, 61.9, 61.9, 61.5, 20.6, 20.6, 20.5, 20.5, 20.5, 20.5 ppm

HRMS (ESI): *m/z* calculated for C<sub>24</sub>H<sub>28</sub>O<sub>11</sub>SNa: 547.1250 [M+Na]<sup>+</sup>; found 547.1251

Anal. Calcd for C<sub>24</sub>H<sub>28</sub>O<sub>11</sub>S: C, 54.96; H, 5.38. Found: C, 55.20; H, 5.42.

IR (film, cm<sup>-1</sup>): 2951, 1755, 1720, 1371, 1270, 1041.

**(2R,3R,4S,5R,6S)-2-(acetoxymethyl)-6-(phenethylthio)tetrahydro-2H-pyran-3,4,5-triyl triacetate (17m)**

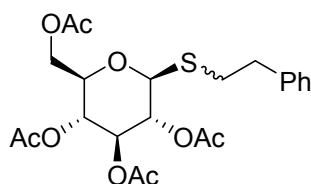

Following the general procedure with a change of stoichiometry: compound **17m** was obtained from styrene (0.1 mmol) and 1-thio- $\beta$ -D-glucose tetraacetate (0.2 mmol). The crude product was purified by column chromatography using silica gel (hexane/AcOEt) to afford 29 mg of compound **17m** as yellowish oily foam, yield = **63%** for H<sub>2</sub>TPP, yield = **74%** (34 mg) for PPIX/p-toluidine, 6 h). Analytical data for compound **17m** are in agreement with the literature data.<sup>16</sup>

<sup>1</sup>H NMR (500 MHz, CDCl<sub>3</sub>)  $\delta$  7.29 (m, 2H), 7.25 – 7.17 (m, 3H), 5.20 (t,  $J$  = 9.3 Hz, 1H), 5.05 (dt,  $J$  = 17.2, 9.7 Hz, 2H), 4.45 (d,  $J$  = 10.0 Hz, 1H), 4.24 (dd,  $J$  = 12.4, 5.1 Hz, 1H), 4.14 (dd,  $J$  = 12.4, 2.5 Hz, 1H), 3.67 (m, 1H), 3.01 – 2.87 (m, 4H), 2.06 (s, 3H), 2.04 (s, 3H), 2.02 (s, 3H), 2.00 (s, 3H) ppm.

<sup>13</sup>C{H} NMR (126 MHz, CDCl<sub>3</sub>)  $\delta$  170.6, 170.1, 169.3, 169.3, 140.0, 128.5, 128.5, 126.5, 83.45, 75.9, 73.8, 69.8, 68.3, 62.1, 36.2, 31.2, 20.7, 20.6, 20.6, 20.5 ppm.

**1-benzyl 4-(3-(((2S,3R,4S,5R,6R)-3,4,5-triacetoxy-6-(acetoxymethyl)tetrahydro-2H-pyran-2-yl)thio)allyl) (tert-butoxycarbonyl)-L-aspartate (17n) (two diastereoisomers)**

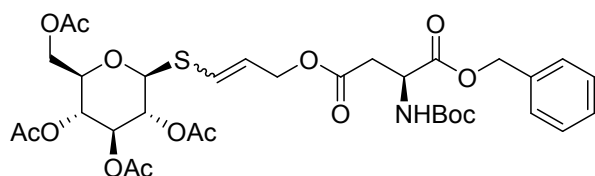

Following the general procedure: compound **17n** was obtained from 1-benzyl 4-(prop-2-yn-1-yl) (tert-butoxycarbonyl)aspartate (0.4 mmol) and 1-thio- $\beta$ -D-glucose tetraacetate (0.2 mmol). The crude product was purified by column chromatography using silica gel (hexane/AcOEt) to afford 71 mg of compound **17n** as a white oily foam **17n** as a mixture of two diastereoisomers ( $Z/E$  = 50:50), yield = **50%** for H<sub>2</sub>TPP, yield = **53%** (75 mg) for H<sub>2</sub>TPP/p-toluidine, yield = **45%** (64 mg) for PPIX, 16 h).

<sup>1</sup>H NMR (500 MHz, CDCl<sub>3</sub>)  $\delta$  7.35 (q,  $J$  = 7.0, 6.6 Hz, 5H + *E* (5H)), 6.41 – 6.35 (m, 1H + *E* (1H)), 5.84 (m, 1H + *E* (1H)), 5.47 (m, 1H + *E* (1H)), 5.22 (m, 1H + *E* (1H)), 5.18 – 5.03 (m, 5H + *E* (5H)), 4.72 – 4.51 (m, 4H + *E* (4H)), 4.26 (m, 1H + *E* (1H)), 4.14 (m, 1H + *E* (1H)), 3.74 (m, 1H + *E* (1H)), 3.05 (m, 1H), 2.87 (m, 1H + *E* (1H)), 2.08 (s, 3H), 2.07 (s, 3H), 2.05 (s, 3H), 2.04 (s, 3H), 2.03 (s, 3H), 2.02 (s, 3H), 2.00 (s, 3H), 1.99 (s, 3H), 1.43 (s, 9H + *E* (9H)) ppm.

<sup>13</sup>C{H} NMR (126 MHz, CDCl<sub>3</sub>)  $\delta$  170.6, 170.6, 170.1, 169.3, 169.1, 169.1, 155.3, 135.4, 128.6, 128.6, 128.4, 128.4, 128.3, 128.3, 126.9, 126.4, 125.5, 123.7, 83.4, 83.0, 80.2, 76.7, 76.3, 76.1, 73.8, 73.7, 69.9, 69.8, 68.1, 68.0, 66.8, 66.8, 65.3, 62.1, 61.9, 61.9, 50.1, 36.8, 28.3, 20.7, 20.6, 20.5, 20.5, 20.5 ppm.

HRMS (ESI):  $m/z$  calculated for C<sub>23</sub>H<sub>44</sub>O<sub>15</sub>SN: 748.2251 [M+Na]<sup>+</sup>; found 748.2244.

IR (film, cm<sup>-1</sup>): 3378, 2978, 1754, 1499, 1367, 1227, 1042.

HPLC: >95% purity

<sup>16</sup> Limnios, D.; Kokotos, G. C. *Adv. Synth. Catal.* **2017**, *359*, 323–328.

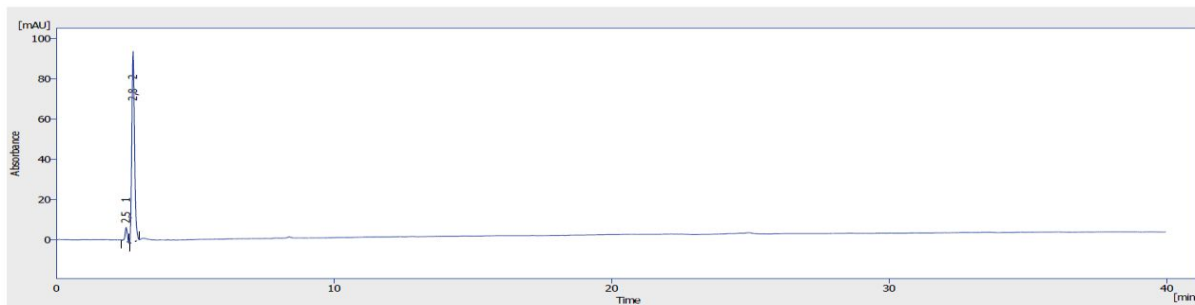

|   | Reten. Time [min] | Area [mAU.s] | Height [mAU] | Area [%] | Height [%] | W05 [min] | PDA Peak Purity | Compound Name | PDA Best Match Name | PDA Best Match |
|---|-------------------|--------------|--------------|----------|------------|-----------|-----------------|---------------|---------------------|----------------|
| 1 | 2,517             | 37,810       | 7,022        | 5,5      | 6,9        | 0,10      | 982             |               |                     |                |
| 2 | 2,767             | 651,252      | 94,872       | 94,5     | 93,1       | 0,13      | 660             |               |                     |                |
|   | Total             | 689,062      | 101,894      | 100,0    | 100,0      |           |                 |               |                     |                |

### 4.3. Reductive decarboxylative C(sp<sup>3</sup>)–C(sp) bond coupling reaction

Alkynyl *p*-tolylsulfones **19** were prepared as previously reported.<sup>17</sup>

#### General procedure for the synthesis of *N*-hydroxyphthalimide esters

A carboxylic acid (2.5 mmol, 1 equiv), *N*-hydroxyphthalimide (4.15 mmol, 1.66 equiv), 4-dimethylaminopyridine (DMAP, 0.125 mmol, 0.05 equiv), *N,N'*-dicyclohexylcarbodiimide (3.75 mmol, 1.5 equiv), and dry THF (for esters **18A-F**) or dry DCM (for esters **18G-H**) (c=0.2 M) were placed under argon in a round-bottom flask equipped with a stirring bar. The resulting mixture was stirred at room temperature overnight. The mixture was then filtered, and the precipitate was rinsed with cold diethyl ether. The filtrate was concentrated *in vacuo* and the crude product was purified via column chromatography on silica (elution: ethyl acetate/hexane 0-30%).

Analytical data for the previously reported esters **18A**,<sup>18</sup> **18B**,<sup>19</sup> **18C**,<sup>20</sup> **18D**,<sup>21</sup> **18E**,<sup>22</sup> **18F**,<sup>18</sup> **18G**,<sup>23</sup> and **18H**<sup>23</sup> are in agreement with the literature data.

---

<sup>17</sup> Ociepa, M.; Turkowska, J.; Gryko, D. *ACS Catal.* **2018**, *8*, 11362–11367

<sup>18</sup> Huihui, K. M. M.; Caputo, J. A.; Melchor, Z.; Olivares, A. M.; Spiewak, A. M.; Johnson, K. A.; DiBenedetto, T. A.; Kim, S.; Ackerman, L. K. G.; Weix, D. J. *J. Am. Chem. Soc.* **2016**, *138*, 5016–5019

<sup>19</sup> Zhang, Y. L.; Yang, L.; Wu, J.; Zhu, C.; Wang, P. *Org. Lett.* **2020**, *22*, 7768–7772

<sup>20</sup> Dai, J.-J., Teng, X.-X., Fang, W., Xu, J., Xu, H.-J. *Chin. Chem. Lett.* **2022**, *33*, 1555–1558

<sup>21</sup> Schwarz, J.; König, B. *Green Chem.* **2016**, *18*, 4743–4749

<sup>22</sup> Pratsch, G.; Lackner, G. L.; Overman, L. E. *J. Org. Chem.* **2015**, *80*, 6025–6036.

<sup>23</sup> Qin, T.; Malins, L. R.; Edwards, J. T.; Merchant, R. R.; Novak, A. J. E.; Zhong, J. Z.; Mills, R. B.; Yan, M.; Yuan, C.; Eastgate, M. D.; Baran, P. S. *Angew. Chem., Int. Ed.* **2017**, *56*, 260–265

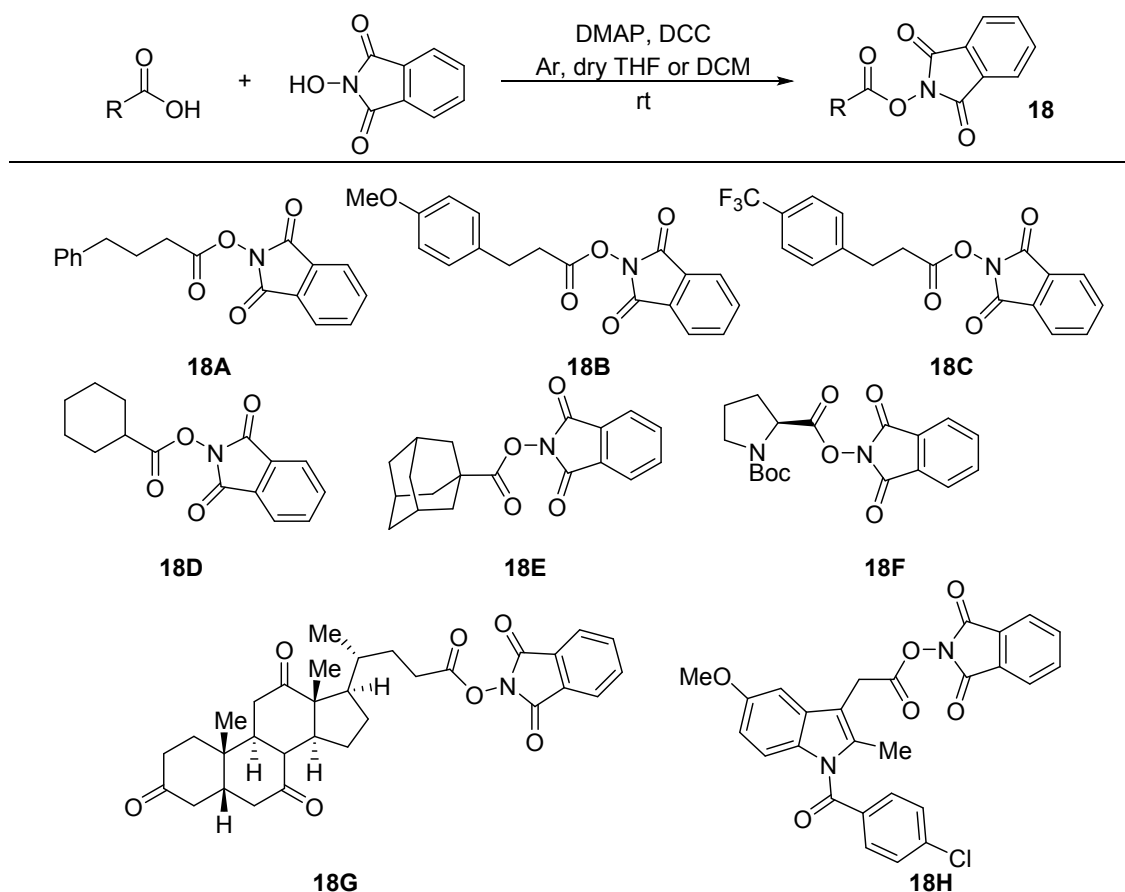

#### 4.3. Reductive decarboxylative C(Sp<sup>3</sup>)–C(Sp) bond coupling reaction

Optimization studies:

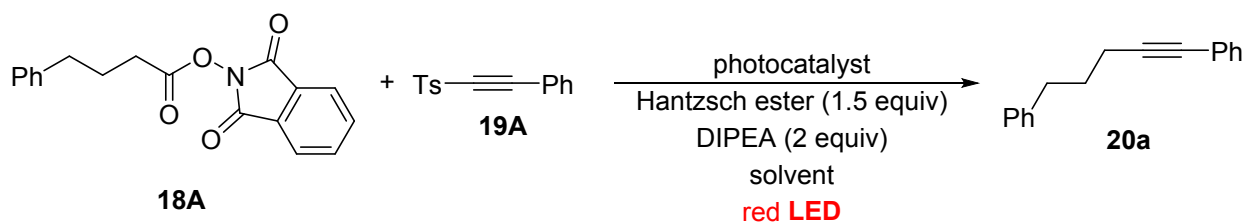

Table S7. Control experiments in acetonitrile.

| Entry | Change of Conditions | GC yield [%] |
|-------|----------------------|--------------|
| 1     | –                    | 40           |
| 2     | no photocatalyst     | 15           |
| 3     | no Hantzsch ester    | 19           |
| 4     | no DIPEA             | 3            |
| 5     | no light             | 1            |

**Standard reaction conditions:** ester (**18A**, 0.1 mmol, 1.0 equiv), alkyne *p*-tolylsulfone (**19A**, 0.15 mmol, 1.5 equiv), photocatalyst: H<sub>2</sub>TPP (2 mol%), Hantzsch ester (0.15 mmol, 1.5 equiv), DIPEA (0.2 mmol, 2 equiv), MeCN (c = 0.1 M), 18 h

Table S8. Control experiments in acetone.

| Entry | Change of Conditions | GC yield [%] |
|-------|----------------------|--------------|
|-------|----------------------|--------------|

|   |                                     |    |
|---|-------------------------------------|----|
| 1 | –                                   | 70 |
| 2 | no light                            | 4  |
| 3 | no photocatalyst                    | 13 |
| 4 | no photocatalyst, no Hantzsch ester | 0  |
| 5 | no photocatalyst, 40°C              | 5  |

**Standard reaction conditions:** ester (**18A**, 0.1 mmol, 1.0 equiv.), alkynyl *p*-tolylsulfone (**19A**, 0.15 mmol, 1.5 equiv), photocatalyst: H<sub>2</sub>TPP (2 mol%), Hantzsch ester (0.15 mmol, 1.5 equiv), DIPEA (0.2 mmol, 2 equiv), acetone (c = 0.1 M), 18 h

Table S9. Solvent screening.

| Entry | Solvent (c = 0.1 M)               | GC yield [%]          |
|-------|-----------------------------------|-----------------------|
| 1     | MeCN                              | 40                    |
| 2     | THF                               | 29                    |
| 3     | AcOEt                             | 21                    |
| 4     | DMSO                              | 55                    |
| 5     | DMF                               | 60 (58 <sup>a</sup> ) |
| 6     | DMF (suchy)                       | 59                    |
| 7     | DCE                               | 70                    |
| 8     | Aceton                            | 70                    |
| 9     | Aceton/H <sub>2</sub> O (4:1 v/v) | 66                    |
| 10    | H <sub>2</sub> O                  | 25                    |
| 11    | H <sub>2</sub> O/DCE (1:1 v/v)    | 58                    |
| 12    | H <sub>2</sub> O/Aceton (1:1 v/v) | 47                    |
| 13    | H <sub>2</sub> O/DMF (1:1 v/v)    | 9                     |

**Reaction conditions:** ester (**18A**, 0.1 mmol, 1.0 equiv), alkynyl *p*-tolylsulfone (**19A**, 0.15 mmol, 1.5 equiv), photocatalyst: H<sub>2</sub>TPP (2 mol%), Hantzsch ester (0.15 mmol, 1.5 equiv), DIPEA (0.2 mmol, 2 equiv), solvent (c = 0.1 M), 18 h. <sup>a</sup> Yield of isolated product

Table S10. Photocatalyst screening.

| Entry | Porphyrin                                       | GC yield [%]    |
|-------|-------------------------------------------------|-----------------|
| 1     | H <sub>2</sub> TPP (1 mol%)                     | 66 <sup>a</sup> |
| 2     | H <sub>2</sub> TPP (2 mol%)                     | 70              |
| 3     | H <sub>2</sub> TPP (2 mol%)                     | 60 <sup>a</sup> |
| 4     | H <sub>2</sub> TPP (4 mol%)                     | 57              |
| 5     | H <sub>2</sub> T(4-OMeP)P (2 mol%)              | 56              |
| 6     | H <sub>2</sub> T(4-CF <sub>3</sub> P)P (2 mol%) | 11              |

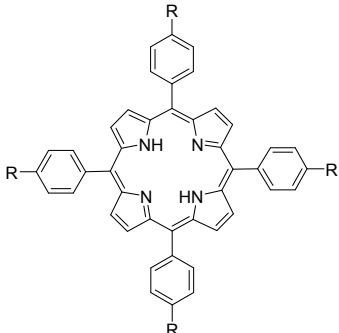

R  
 H    H<sub>2</sub>TPP  
 OMe    H<sub>2</sub>T(4-OMeP)P  
 CF<sub>3</sub>    H<sub>2</sub>T(4-CF<sub>3</sub>P)P

**Reaction conditions:** ester (**18A**, 0.1 mmol, 1.0 equiv), alkynyl *p*-tolylsulfone (**19A**, 0.15 mmol, 1.5 equiv), photocatalyst, Hantzsch ester (0.15 mmol, 1.5 equiv), DIPEA (0.2 mmol, 2 equiv), acetone (c = 0.1 M), 18 h. <sup>a</sup> Reaction performed on 0.2 mmol scale.

Table S11. Additional optimization.

| Entry | 18A:19A molar ratio | LED power [%] | Time [h] | Photocatalyst loading [mol%] | GC yield [%]          |
|-------|---------------------|---------------|----------|------------------------------|-----------------------|
| 1     | 1.0:1.5             | 25            | 18       | 2                            | 70                    |
| 2     | 1.5:1.0             | 25            | 18       | 2                            | 77                    |
| 3     | 1.5:1.0             | 100           | 1        | 2                            | 82 <sup>a</sup>       |
| 4     | 1.5:1.0             | 100           | 1        | 1                            | 83 <sup>a</sup>       |
| 5     | 1.0:1.0             | 100           | 1        | 2                            | 86 (82 <sup>a</sup> ) |
| 6     | 1.7:1.0             | 100           | 1        | 2                            | 86 (85 <sup>a</sup> ) |
| 7     | 2.0:1.0             | 100           | 1        | 1                            | 83 (82 <sup>a</sup> ) |

**Reaction conditions:** ester (**18A**, 0.1-0.2 mmol), alkynyl *p*-tolylsulfone (**19A**, 0.1-0.15 mmol), photocatalyst: H<sub>2</sub>TPP, Hantzsch ester (0.15 mmol, 1.5 equiv), DIPEA (0.2 mmol, 2 equiv), acetone (c = 0.1 M). <sup>a</sup> Reaction performed on 0.2 mmol scale.

Table S12. Biocompatible conditions screening.

| Entry | Solvent                       | Photocatalyst loading [mol%] | 18A:19A molar ratio | GC yield [%]          |
|-------|-------------------------------|------------------------------|---------------------|-----------------------|
| 1     | DMSO                          | 1                            | 1 : 1               | 65 (54 <sup>a</sup> ) |
| 2     | DMF                           | 1                            | 1 : 1               | 44                    |
| 3     | EtOH                          | 1                            | 1 : 1               | 58                    |
| 4     | Aceton                        | 1                            | 1 : 1               | 66                    |
| 5     | MeCN                          | 1                            | 1 : 1               | 65                    |
| 6     | DMSO                          | 1                            | 2 : 1               | 61                    |
| 7     | DMSO                          | 2                            | 1 : 1               | 45                    |
| 8     | DMSO : H <sub>2</sub> O (4:1) | 1                            | 1 : 1               | 67                    |
| 9     | DMSO : H <sub>2</sub> O (9:1) | 1                            | 1 : 1               | 66                    |
| 10    | DMSO : H <sub>2</sub> O (4:1) | 1                            | 1 : 1               | 55                    |
| 11    | DMSO : H <sub>2</sub> O (4:1) | 1                            | 1 : 1, c = 0.4 M    | 58                    |
| 12    | DMSO : PBS (4:1)              | 1                            | 1 : 1               | 62                    |

**Reaction conditions:** ester (**18A**, 0.2-0.4 mmol), alkynyl *p*-tolylsulfone (**19A**, 0.2 mmol), photocatalyst: PPIX, Hantzsch ester (0.3 mmol, 1.5 equiv), DIPEA (0.4 mmol, 2 equiv), solvent (c = 0.1 M), 1h. <sup>a</sup> Yield of isolated product.



## Scope and limitations studies:

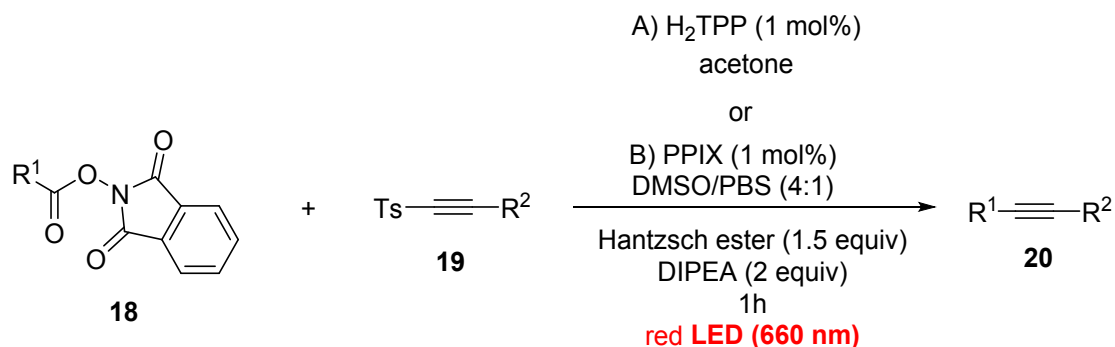

**General procedure A:** *N*-hydroxyphthalimide ester (0.2 mmol, 1.0 equiv), alkynyl *p*-tolylsulfone (0.2 mmol, 1.0 equiv), Hantzsch ester (76.0 mg, 0.3 mmol, 1.5 equiv) and H<sub>2</sub>TPP (1.2 mg, 1 mol%) were placed in a 10 mL vial with a septum equipped with a stirring bar. Next acetone (2 mL) and DIPEA (0.4 mmol, 70  $\mu$ L, 2.0 equiv) were added. The reaction mixture was stirred under red light irradiation (660 nm, 100% power of the photoreactor) for 1 hour. After that time the mixture was concentrated using rotary evaporator. The crude product was purified by flash chromatography using silica gel (hexane/AcOEt).

**General procedure B:** *N*-hydroxyphthalimide ester (0.2 mmol, 1.0 equiv), alkynyl *p*-tolylsulfone (0.2 mmol, 1.0 equiv), Hantzsch ester (76.0 mg, 0.3 mmol, 1.5 equiv.) and PPIX (1.1 mg, 1 mol%) were placed in a 10 mL vial with a septum equipped with a stirring bar. Next DMSO (1.6 mL), phosphate-buffered saline solution (0.4 mL) and DIPEA (0.4 mmol, 70  $\mu$ L, 2.0 equiv) were added. The reaction mixture was stirred under red light irradiation (660 nm, 100% power of the photoreactor) for 1 hour. After that time the mixture was concentrated using rotary evaporator. The crude product was purified by flash chromatography using silica gel (hexane/AcOEt).

### *pent-1-yne-1,5-diyl*dibenzene (**20a**)

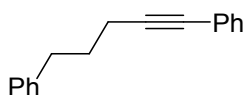

Following the general procedure A, compound **20a** was obtained from 1,3-dioxisoindolin-2-yl 4-phenylbutanoate (0.2 mmol) and 1-methyl-4-((phenylethynyl)sulfonyl)benzene (0.2 mmol). The crude product was purified by column chromatography using silica gel (hexane/AcOEt) to afford 38 mg (**86%** yield) of product **20a** as a colorless oil. Analytical data for compound **20a** are in agreement with the literature data.<sup>24</sup>

<sup>1</sup>H NMR (400 MHz, CDCl<sub>3</sub>)  $\delta$  7.44 – 7.37 (m, 2H), 7.32 – 7.24 (m, 5H), 7.28 – 7.13 (m, 3H), 2.78 (t, *J* = 7.6 Hz, 2H), 2.41 (t, *J* = 7.0 Hz, 2H), 1.92 (p, *J* = 7.1 Hz, 2H) ppm.

<sup>13</sup>C{<sup>1</sup>H} NMR (101 MHz, CDCl<sub>3</sub>)  $\delta$  141.6, 131.5, 128.5, 128.3, 128.2, 127.5, 125.9, 124.0, 89.8, 81.2, 34.8, 30.3, 18.8 ppm.

### *1-methoxy-4-(4-phenylbut-3-yn-1-yl)benzene (20b)*

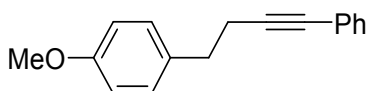

Following the general procedure A, compound **20b** was obtained from 1,3-dioxisoindolin-2-yl 3-(4-methoxyphenyl)propanoate (0.2 mmol) and 1-methyl-4-((phenylethynyl)sulfonyl)benzene (0.2 mmol).

<sup>24</sup> Ohmiya, H.; Yang, M. Y.; Yamauchi, Y.; Ohtsuka, Y.; Sawamura, M. *Org. Lett.* **2010**, *12*, 1796–1799

The crude product was purified by column chromatography to afford 29 mg (**61%** yield) of compound **20b** as an oil. Following the general procedure B provided 19 mg (**40%** yield) of the product.

Analytical data for compound **20b** are in agreement with the literature data.<sup>25</sup>

<sup>1</sup>H NMR (500 MHz, CDCl<sub>3</sub>) δ 7.40 – 7.33 (m, 2H), 7.31 – 7.22 (m, 3H), 7.19 (d, *J* = 8.7 Hz, 2H), 6.85 (d, *J* = 8.7 Hz, 2H), 3.79 (s, 3H), 2.86 (t, *J* = 7.5 Hz, 2H), 2.65 (t, *J* = 7.5 Hz, 2H) ppm.

<sup>13</sup>C{<sup>1</sup>H} NMR (126 MHz, CDCl<sub>3</sub>) δ 158.1, 132.9, 131.5, 129.5, 128.2, 127.6, 123.9, 113.8, 89.6, 81.3, 55.3, 34.3, 22.0 ppm.

### 1-(4-phenylbut-3-yn-1-yl)-4-(trifluoromethyl)benzene (20c)

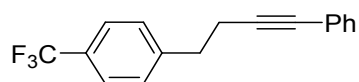

Following the general procedure A, compound **20c** was obtained from 1,3-dioxoisindolin-2-yl 3-(4-(trifluoromethyl)phenyl)propanoate **1** (0.2 mmol) and 1-methyl-4-((phenylethynyl)sulfonyl)benzene (0.2 mmol). The crude product was purified by column chromatography using silica gel (hexane/AcOEt) to afford 32 mg (**57%** yield) of the product as an off-white solid. Following the general procedure B provided 23 mg (**42%** yield) of the product.

<sup>1</sup>H NMR (500 MHz, CDCl<sub>3</sub>) δ 7.57 (d, *J* = 7.9 Hz, 2H), 7.39 (d, *J* = 7.9 Hz, 2H), 7.37 – 7.31 (m, 2H), 7.29 – 7.25 (m, 3H), 2.97 (t, *J* = 7.3 Hz, 2H), 2.72 (t, *J* = 7.3 Hz, 2H) ppm.

<sup>13</sup>C{<sup>1</sup>H} NMR (126 MHz, CDCl<sub>3</sub>) δ 144.6, 131.5, 128.9, 128.7 (q, *J*<sub>C-F</sub> = 32.4 Hz), 128.2, 127.8, 125.3 (q, *J*<sub>C-F</sub> = 3.8 Hz), 124.3 (q, *J*<sub>C-F</sub> = 271.7 Hz), 123.6, 88.6, 81.8, 34.8, 21.3 ppm.

<sup>19</sup>F NMR (376 MHz, CDCl<sub>3</sub>) δ -62.4 ppm.

IR (film, cm<sup>-1</sup>): 2941, 2925, 1331, 1160, 1111, 1069, 759, 692.

HRMS (EI): *m/z* calcd for [C<sub>17</sub>H<sub>13</sub>F<sub>3</sub>]<sup>+</sup>: 274.0969; found: 274.0966.

Anal. Calcd for C<sub>17</sub>H<sub>13</sub>F<sub>3</sub>: C, 74.44; H, 4.78. Found: C, 74.24; H, 4.87.

### (cyclohexylethynyl)benzene (20d)

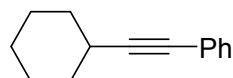

Following the general procedure A, compound **20d** was obtained from 1,3-dioxoisindolin-2-yl cyclohexanecarboxylate (0.2 mmol) and 1-methyl-4-((phenylethynyl)sulfonyl)benzene (0.2 mmol). The crude product was purified by column chromatography using silica gel (hexane/AcOEt) to afford 25 mg (**68%** yield) of compound **20d** as a colorless oil.

Analytical data for compound **20d** are in agreement with the literature data.<sup>29</sup>

<sup>1</sup>H NMR (400 MHz, CDCl<sub>3</sub>) δ 7.42 – 7.35 (m, 2H), 7.31 – 7.20 (m, 3H), 2.64 – 2.53 (m, 1H), 1.93 – 1.83 (m, 2H), 1.82 – 1.70 (m, 2H), 1.60 – 1.47 (m, 3H), 1.43 – 1.28 (m, 3H) ppm.

<sup>13</sup>C{<sup>1</sup>H} NMR (101 MHz, CDCl<sub>3</sub>) δ 131.6, 128.1, 127.4, 124.2, 94.4, 80.5, 32.7, 29.7, 25.9, 24.9 ppm.

### 3-(5-phenylpent-1-yn-1-yl)thiophene (20e)

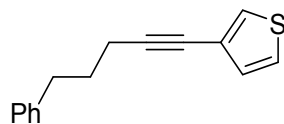

Following the general procedure A, compound **20e** was obtained from 1,3-dioxoisindolin-2-yl 4-phenylbutanoate (0.2 mmol) and 3-(tosylethynyl)thiophene (0.2 mmol). The crude product was purified by column chromatography using silica gel (hexane/AcOEt) to afford 39 mg (**86%** yield) of compound **20e** as a waxy solid.

Analytical data for compound **20e** are in agreement with the literature data.<sup>26</sup>

<sup>25</sup> a) Zhang, X.; Larock, R. C. *J. Am. Chem. Soc.* **2005**, *127*, 12230–12231; b) Ma, S; Wang, L., *J. Org. Chem.* **1998**, *63*, 3497–3498

<sup>26</sup> Lv, L.; Yu, L.; Qiu, Z.; Li, C. *Angew. Chem., Int. Ed.* **2020**, *59*, 6466–6472.

**<sup>1</sup>H NMR** (400 MHz, CDCl<sub>3</sub>) δ 7.35 (dd, *J* = 3.0, 1.1 Hz, 1H), 7.32 – 7.16 (m, 6H), 7.08 (dd, *J* = 5.0, 1.2 Hz, 1H), 2.78 (t, *J* = 7.6 Hz, 2H), 2.40 (t, *J* = 7.0 Hz, 2H), 1.98 – 1.86 (m, 2H) ppm.  
**<sup>13</sup>C{<sup>1</sup>H} NMR** (101 MHz, CDCl<sub>3</sub>) δ 141.6, 130.0, 128.5, 128.4, 127.6, 125.9, 125.0, 122.9, 89.3, 76.1, 34.9, 30.3, 18.8 ppm.

**1-(5-phenylpent-1-yn-1-yl)naphthalene (20f)**

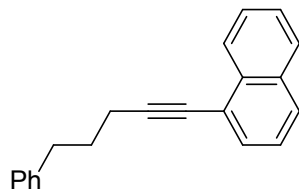

Following the general procedure A, compound **20f** was obtained from 1,3-dioxisoindolin-2-yl 4-phenylbutanoate (0.2 mmol) and 1-(tosylethynyl)naphthalene (0.2 mmol). The crude product was purified by column chromatography using silica gel (hexane/AcOEt) to afford 50 mg (**93%** yield) of compound **20f** as a colorless oil.

**<sup>1</sup>H NMR** (500 MHz, CDCl<sub>3</sub>) δ 8.36 (d, *J* = 8.3 Hz, 1H), 7.83 (d, *J* = 8.2 Hz, 1H), 7.78 (d, *J* = 8.2 Hz, 1H), 7.63 (dd, *J* = 7.1, 1.2 Hz, 1H), 7.55 (ddd, *J* = 8.3, 6.8, 1.4 Hz, 1H), 7.49 (ddd, *J* = 8.1, 6.8, 1.3 Hz, 1H), 7.40 (dd, *J* = 8.3, 7.1 Hz, 1H), 7.34 – 7.28 (m, 2H), 7.27 – 7.24 (m, 2H), 7.24 – 7.18 (m, 1H), 2.88 (t, *J* = 7.6 Hz, 2H), 2.58 (t, *J* = 7.0 Hz, 2H), 2.03 (p, *J* = 7.1 Hz, 2H) ppm.

**<sup>13</sup>C{<sup>1</sup>H} NMR** (126 MHz, CDCl<sub>3</sub>) δ 141.6, 133.5, 133.2, 130.0, 128.6, 128.4, 128.2, 128.0, 126.5, 126.3, 126.2, 125.9, 125.2, 121.7, 94.9, 79.2, 35.0, 30.5, 19.2 ppm.

**IR** (film, cm<sup>-1</sup>): 2937, 799, 773, 699.

**HRMS** (EI): *m/z* calcd for [C<sub>21</sub>H<sub>18</sub>]<sup>+</sup>: 270.1409; found: 270.1405.

**GC**: 98% purity

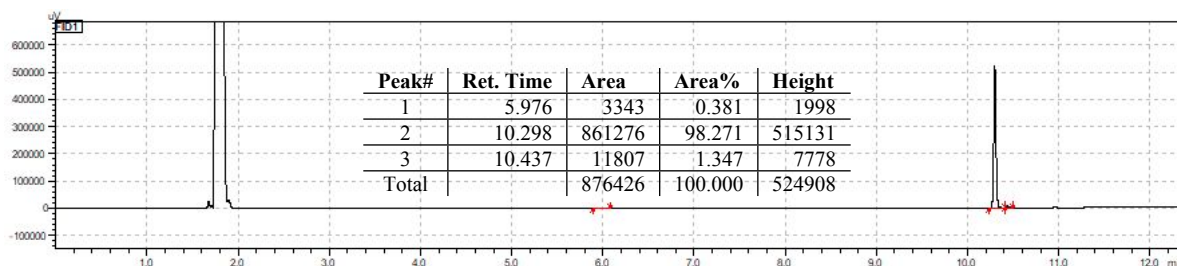

**triisopropyl(5-phenylpent-1-yn-1-yl)silane (20g)**

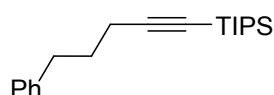

Following the general procedure A, compound **20g** was obtained from 1,3-dioxisoindolin-2-yl 4-phenylbutanoate (0.2 mmol) and triisopropyl(tosylethynyl)silane (0.2 mmol). The crude product was purified by column chromatography using silica gel (hexane/AcOEt) to afford 27 mg (**44%** yield) of compound **20g** as a colorless oil.

Analytical data for compound **20g** are in agreement with the literature data.<sup>27</sup>

**<sup>1</sup>H NMR** (400 MHz, CDCl<sub>3</sub>) δ 7.32 – 7.23 (m, 2H), 7.22 – 7.15 (m, 3H), 2.76 (t, *J* = 7.6 Hz, 2H), 2.27 (t, *J* = 6.9 Hz, 2H), 1.84 (p, *J* = 6.9 Hz, 2H), 1.13 – 1.03 (m, 21H) ppm.

**<sup>13</sup>C{<sup>1</sup>H} NMR** (101 MHz, CDCl<sub>3</sub>) δ 141.8, 128.6, 128.3, 125.9, 108.7, 80.8, 34.7, 30.7, 19.3, 18.7, 11.3 ppm.

**tert-butyl dimethyl(3-(4-(4-(trifluoromethyl)phenyl)but-1-yn-1-yl)phenoxy)silane (20h)**

<sup>27</sup> Huang, L.; Olivares, A. M.; Weix, D. J. *Angew. Chem., Int. Ed.* **2017**, *56*, 11901–11905

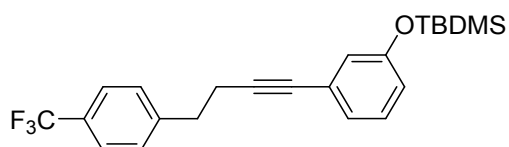

Following the general procedure A, compound **20h** was obtained from 1,3-dioxoisindolin-2-yl 3-(4-(trifluoromethyl)phenyl)propanoate (0.18 mmol) and *tert*-butyldimethyl(3-(tosylethynyl)phenoxy)silane (0.2 mmol). The crude product was purified by column chromatography using silica gel (hexane/AcOEt) to afford 40 mg (**53%** yield) of compound **20h** as a colorless oil.

**<sup>1</sup>H NMR** (500 MHz, CDCl<sub>3</sub>) δ 7.57 (d, *J* = 7.9 Hz, 2H), 7.39 (d, *J* = 7.9 Hz, 2H), 7.13 (t, *J* = 7.9 Hz, 1H), 6.97 – 6.92 (m, 1H), 6.85 – 6.80 (m, 1H), 6.77 (ddd, *J* = 8.2, 2.5, 1.1 Hz, 1H), 2.97 (t, *J* = 7.3 Hz, 2H), 2.71 (t, *J* = 7.3 Hz, 2H), 0.98 (s, 9H), 0.19 (s, 6H).

**<sup>13</sup>C{<sup>1</sup>H} NMR** (126 MHz, CDCl<sub>3</sub>) δ 155.4, 144.6, 129.3, 128.9, 128.7 (q, *J*<sub>C-F</sub> = 32.2 Hz), 125.3 (q, *J*<sub>C-F</sub> = 3.8 Hz), 124.6, 124.5, 124.3 (q, *J*<sub>C-F</sub> = 271.7 Hz), 123.1, 120.1, 88.4, 81.7, 34.8, 25.6, 21.3, 18.2, –4.5.

**<sup>19</sup>F NMR** (470 MHz, CDCl<sub>3</sub>) δ –62.4 ppm.

**IR** (film, cm<sup>-1</sup>): 2955, 2931, 1326, 1166, 1126, 839.

**HRMS** (APCI): *m/z* calcd for C<sub>23</sub>H<sub>28</sub>OF<sub>3</sub>Si [M+H]<sup>+</sup>: 405.1862; found: 405.1868.

**Anal.** Calcd for C<sub>23</sub>H<sub>27</sub>F<sub>3</sub>OSi: C, 68.29; H, 6.73. Found: C, 68.40; H, 6.76.

### (3*r*,5*r*,7*r*)-1-(phenylethynyl)adamantane (**20i**)

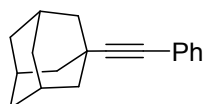

Following the general procedure A, compound **20i** was obtained from 1,3-dioxoisindolin-2-yl bicyclo[2.2.2]octane-1-carboxylate (0.18 mmol) and 1-methyl-4-((phenylethynyl)sulfonyl)benzene (0.2 mmol). The crude product was purified by column chromatography using silica gel (hexane/AcOEt) to afford 36 mg (**83%** yield) of compound **20i** as a white solid. Following the general procedure B (using 0.18 mmol of **18E** and 0.2 mmol of **19A**) provided 22 mg (51% yield) of the product.

Analytical data for compound **20i** are in agreement with the literature data.<sup>28</sup>

**<sup>1</sup>H NMR** (500 MHz, CDCl<sub>3</sub>) δ 7.40 – 7.35 (m, 2H), 7.28 – 7.22 (m, 3H), 1.99 (s, 3H), 1.96 (s, 6H), 1.72 (s, 6H) ppm.

**<sup>13</sup>C{<sup>1</sup>H} NMR** (101 MHz, CDCl<sub>3</sub>) δ 131.6, 128.1, 127.3, 124.1, 98.4, 79.4, 42.9, 36.4, 30.1, 28.1 ppm.

### *tert*-butyl (*S*)-2-(phenylethynyl)pyrrolidine-1-carboxylate (**20j**)

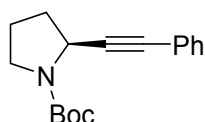

Following the general procedure A, compound **20j** was obtained from 1-(*tert*-butyl) 2-(1,3-dioxoisindolin-2-yl) (*S*)-pyrrolidine-1,2-dicarboxylate (0.2 mmol) and 1-methyl-4-((phenylethynyl)sulfonyl)benzene (0.2 mmol). The crude product was purified by column chromatography using silica gel (hexane/AcOEt) to afford 40 mg (74% yield) of compound **20j** as a white solid.

Analytical data for compound **20j** are in agreement with the literature data.<sup>29</sup>

**<sup>1</sup>H NMR** (400 MHz, CDCl<sub>3</sub>) δ 7.45 – 7.34 (m, 2H), 7.34 – 7.23 (m, 3H), 4.87 – 4.53 (m, 1H), 3.62 – 3.25 (m, 2H), 2.16 – 1.84 (m, 4H), 1.50 (s, 9H) ppm.

**<sup>13</sup>C{<sup>1</sup>H} NMR** (101 MHz, CDCl<sub>3</sub>) δ 154.2, 131.6, 128.2, 127.9, 123.3, 89.9, 81.6, 79.6, 48.7, 45.7, 33.8, 28.5, 23.8 ppm.

<sup>28</sup> Zhou, Q.-Q.; Guo, W.; Ding, W.; Wu, X.; Chen, X.; Lu, L.-Q.; Xiao, W.-J *Angew. Chem., Int. Ed.* **2015**, *54*, 11196–11199

**(5*S*,9*S*,10*S*,13*R*,14*R*,17*R*)-10,13-dimethyl-17-((*R*)-6-phenylhex-5-yn-2-yl)dodecahydro-3*H*-cyclopenta[*a*]phenanthrene-3,7,12(2*H*,4*H*)-trione (20*k*)**

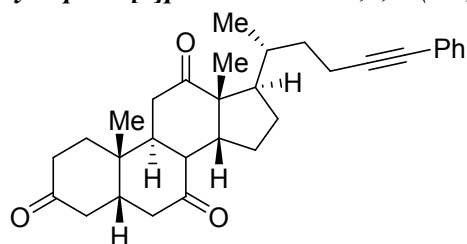

Following the general procedure A, compound **20k** was obtained from 1,3-dioxoisindolin-2-yl (4*R*)-4-((5*S*,9*S*,10*S*,13*R*,14*S*,17*R*)-10,13-dimethyl-3,7,12-trioxohexadecahydro-1*H*-cyclopenta[*a*]phenanthren-17-yl)pentanoate (0.2 mmol) and 1-methyl-4-((phenylethynyl)sulfonyl)benzene (0.2 mmol). The crude product was purified by column chromatography using silica gel (hexane/AcOEt) to afford 60 mg (**66%** yield) of compound **20k** as a solid.

Analytical data for compound **20k** are in agreement with the literature data.<sup>29</sup>

**<sup>1</sup>H NMR** (400 MHz, CDCl<sub>3</sub>) δ 7.43 – 7.32 (m, 2H), 7.32 – 7.21 (m, 3H), 2.98 – 2.78 (m, 3H), 2.57 – 1.72 (m, 18H), 1.69 – 1.57 (m, 1H), 1.40 (s, 3H), 1.35 – 1.20 (m, 2H), 1.10 (s, 3H), 0.91 (d, *J* = 6.4 Hz, 3H) ppm.

**<sup>13</sup>C{<sup>1</sup>H} NMR** (101 MHz, CDCl<sub>3</sub>) δ 211.9, 208.9, 208.6, 131.5, 128.2, 127.4, 124.1, 90.5, 80.5, 57.0, 51.8, 49.0, 46.8, 45.7, 45.5, 45.0, 42.8, 38.6, 36.5, 36.0, 35.4, 35.3, 34.5, 27.7, 25.2, 21.9, 18.6, 16.9, 11.9 ppm.

**3-(5-phenylpent-1-yn-1-yl)phenyl (4*R*)-4-((5*S*,9*S*,10*S*,13*R*,14*R*,17*R*)-10,13-dimethyl-3,7,12-trioxohexadecahydro-1*H*-cyclopenta[*a*]phenanthren-17-yl)pentanoate (20*l*)**

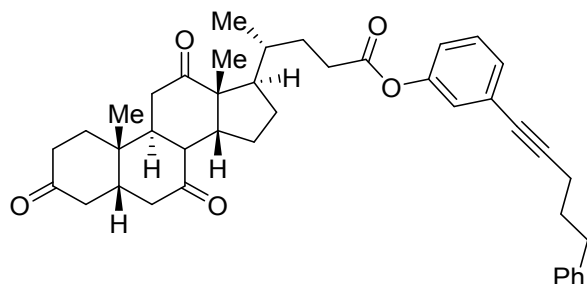

Following the general procedure A, compound **20l** was obtained from 1,3-dioxoisindolin-2-yl 4-phenylbutanoate (0.2 mmol) and 3-(tosylethynyl)phenyl (4*R*)-4-((5*S*,9*S*,10*S*,13*R*,14*R*,17*R*)-10,13-dimethyl-3,7,12-trioxohexadecahydro-1*H*-cyclopenta[*a*]phenanthren-17-yl)pentanoate (0.2 mmol). The crude product was purified by column chromatography using silica gel (hexane/AcOEt) to afford 61 mg (**49%** yield) of compound **20l** as a white solid.

**<sup>1</sup>H NMR** (500 MHz, CDCl<sub>3</sub>) δ 7.33 – 7.25 (m, 4H), 7.25 – 7.16 (m, 3H), 7.15 – 7.09 (m, 1H), 7.00 (dt, *J* = 7.6, 2.1 Hz, 1H), 2.95 – 2.81 (m, 3H), 2.78 (t, *J* = 7.6 Hz, 2H), 2.64 (ddd, *J* = 15.9, 9.1, 5.3 Hz, 1H), 2.51 (ddd, *J* = 16.0, 8.7, 7.3 Hz, 1H), 2.41 (t, *J* = 7.0 Hz, 2H), 2.37 – 1.81 (m, 17H), 1.68 – 1.57 (m, 1H), 1.56 – 1.46 (m, 1H), 1.42 – 1.35 (s+m, 3H+2H), 1.09 (s, 3H), 0.92 (d, *J* = 6.6 Hz, 3H) ppm.

**<sup>13</sup>C{<sup>1</sup>H} NMR** (126 MHz, CDCl<sub>3</sub>) δ 211.8, 208.9, 208.6, 172.3, 150.5, 141.5, 129.1, 129.0, 128.5, 128.4, 125.9, 125.3, 124.6, 121.0, 90.8, 80.3, 56.9, 51.8, 49.0, 46.8, 45.7, 45.5, 44.9, 42.8, 38.6, 36.5, 36.0, 35.5, 35.3, 34.8, 31.5, 30.4, 30.2, 27.6, 25.1, 21.9, 18.8, 18.6, 11.8 ppm.

**IR** (film, cm<sup>-1</sup>): 2928, 2874, 1759, 1712, 1168, 1153, 1123.

**HRMS** (ESI): *m/z* calcd for C<sub>41</sub>H<sub>48</sub>O<sub>5</sub>Na [M+Na]<sup>+</sup>: 643.3399; found: 643.3406.

**HPLC**: > 95% purity

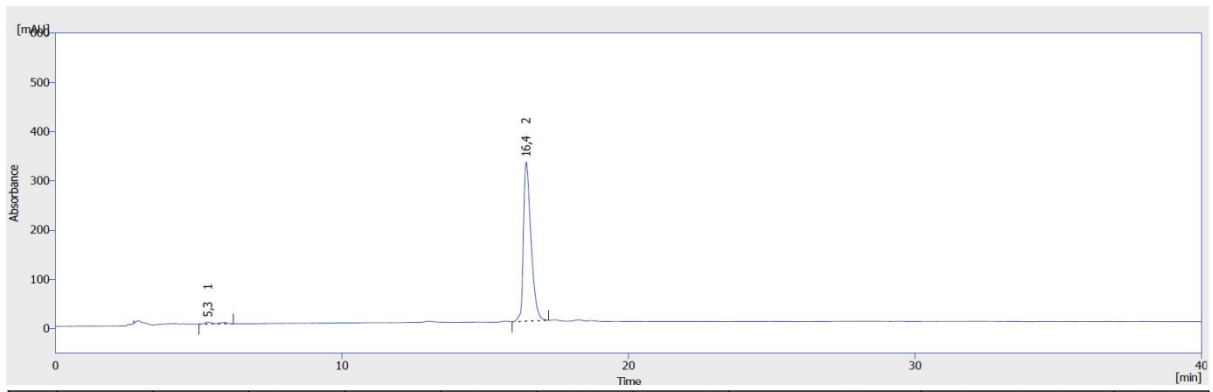

|   | Reten. Time [min] | Area [mAU.s] | Height [mAU] | Area [%] | Height [%] | W05 [min] | PDA Peak Purity | Compound Name | PDA Best Match Name | PDA Best Match |
|---|-------------------|--------------|--------------|----------|------------|-----------|-----------------|---------------|---------------------|----------------|
| 1 | 5,333             | 60,212       | 2,112        | 2,0      | 1,3        | 0,25      | 1000            |               |                     |                |
| 2 | 16,433            | 2966,120     | 161,751      | 98,0     | 98,7       | 0,30      | 957             |               |                     |                |
|   | Total             | 3026,332     | 163,862      | 100,0    | 100,0      |           |                 |               |                     |                |

**(4-chlorophenyl)(5-methoxy-2-methyl-3-(3-phenylprop-2-yn-1-yl)-1H-indol-1-yl)methanone (20m)**

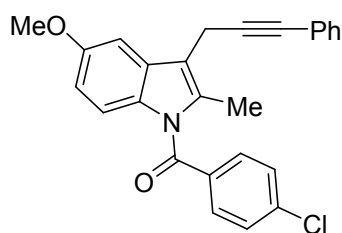

Following the general procedure A, compound **20m** was obtained from 1,3-dioxoisindolin-2-yl 2-(1-(4-chlorobenzoyl)-5-methoxy-2-methyl-1H-indol-3-yl)acetate (0.2 mmol) and 1-methyl-4-((phenylethynyl)sulfonyl)benzene (0.2 mmol). The crude product was purified by column chromatography using silica gel (hexane/AcOEt) to afford 46 mg (55% yield) of compound **20m** as an off-white solid. Following the general procedure B provided 11 mg (13% yield) of the product.

Analytical data for compound **20m** are in agreement with the literature data.<sup>29</sup>

<sup>1</sup>H NMR (400 MHz, CDCl<sub>3</sub>) δ 7.67 (d, *J* = 8.5 Hz, 2H), 7.46 (d, *J* = 8.5 Hz, 2H), 7.41 – 7.36 (m, 2H), 7.29 – 7.23 (m, 3H), 7.18 (d, *J* = 2.5 Hz, 1H), 6.87 (d, *J* = 9.0 Hz, 1H), 6.68 (dd, *J* = 9.0, 2.6 Hz, 1H), 3.83 (s, 3H), 3.79 (s, 2H), 2.43 (s, 3H) ppm.

<sup>13</sup>C{<sup>1</sup>H} NMR (101 MHz, CDCl<sub>3</sub>) δ 168.3, 155.9, 139.2, 134.4, 134.0, 131.6, 131.2, 130.9, 130.4, 129.1, 128.2, 127.8, 123.5, 114.9, 114.7, 111.7, 101.5, 86.7, 81.1, 55.7, 15.0, 13.3 ppm.

**3-(5-phenylpent-1-yn-1-yl)phenyl 2-(1-(4-chlorobenzoyl)-5-methoxy-2-methyl-1H-indol-3-yl)acetate (20n)**

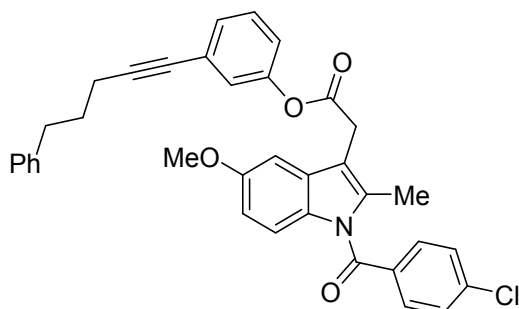

Following the general procedure A, compound **20n** was obtained from 1,3-dioxoisindolin-2-yl 4-phenylbutanoate (0.2 mmol) and 3-(tosylethynyl)phenyl 2-(1-(4-chlorobenzoyl)-5-methoxy-2-methyl-1H-indol-3-yl)acetate (0.2 mmol). The crude product was purified by column chromatography using silica gel (hexane/AcOEt) and subsequent preparative TLC to afford 53 mg (**46%** yield) of compound **20n** as a white solid.

<sup>1</sup>H NMR (400 MHz, CDCl<sub>3</sub>) δ 7.67 (d, *J* = 8.5 Hz, 2H), 7.47 (d, *J* = 8.5 Hz, 2H), 7.32 – 7.26 (m, 4H), 7.23 – 7.16 (m, 3H), 7.12 – 7.08 (m, 1H), 7.05 (d, *J* = 2.5 Hz, 1H), 7.02 – 6.96 (m, 1H), 6.90 (d, *J* = 9.0 Hz, 1H), 6.69 (dd, *J* = 9.0, 2.5 Hz, 1H), 3.89 (s, 2H), 3.84 (s, 3H), 2.77 (t, *J* = 7.5 Hz, 2H), 2.45 (s, 3H), 2.40 (t, *J* = 7.0 Hz, 2H), 1.91 (p, *J* = 7.2 Hz, 2H) ppm.

<sup>13</sup>C{<sup>1</sup>H} NMR (126 MHz, CDCl<sub>3</sub>) δ 169.1, 168.3, 156.1, 150.4, 141.5, 139.3, 136.2, 133.8, 131.2, 130.9, 130.8, 130.4, 129.2, 129.1, 128.8, 128.5, 128.4, 125.9, 125.4, 124.4, 120.9, 115.0, 111.9, 111.9, 101.2, 91.0, 80.1, 55.7, 34.8, 30.5, 30.1, 18.8, 13.4 ppm.

IR (film, cm<sup>-1</sup>): 2924, 2852, 1758, 1683, 1477, 1459, 1319, 1152, 1124.

HRMS (ESI): *m/z* calcd for C<sub>36</sub>H<sub>31</sub>NO<sub>4</sub>Cl [M+H]<sup>+</sup>: 576.1942; found: 576.1934.

HPLC: >95% purity

<sup>29</sup> Guo, J.; Wang, Y.; Li, Y.; Lu, K.; Liu, S.; Wang, W.; Zhang, Y. *Adv. Synth. Catal.* **2020**, *362*, 3898–3904.

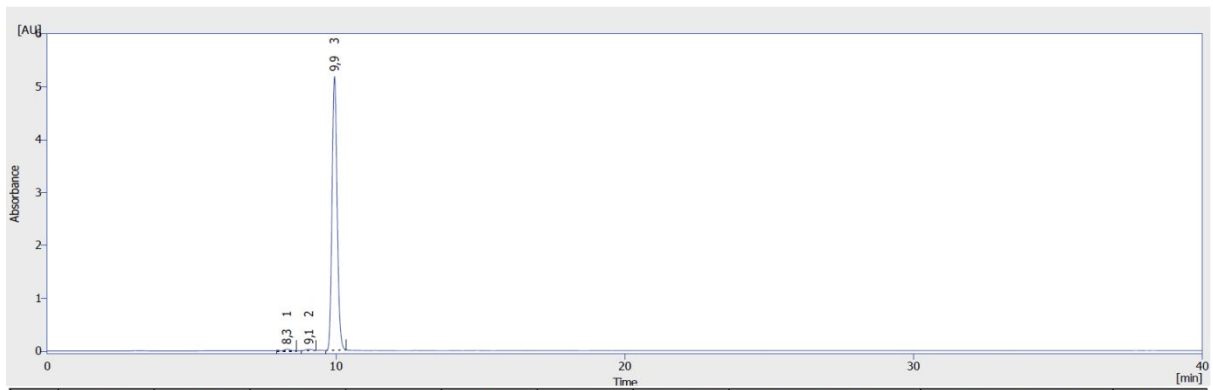

|   | Reten. Time [min] | Area [mAU.s] | Height [mAU] | Area [%] | Height [%] | W05 [min] | PDA Peak Purity | Compound Name | PDA Best Match Name | PDA Best Match |
|---|-------------------|--------------|--------------|----------|------------|-----------|-----------------|---------------|---------------------|----------------|
| 1 | 8,300             | 196,611      | 15,886       | 0,6      | 0,6        | 0,20      | 999             |               |                     |                |
| 2 | 9,067             | 185,480      | 11,819       | 0,6      | 0,5        | 0,28      | 998             |               |                     |                |
| 3 | 9,950             | 31856,420    | 2589,939     | 98,8     | 98,9       | 0,20      | 781             |               |                     |                |
|   | Total             | 32238,511    | 2617,644     | 100,0    | 100,0      |           |                 |               |                     |                |



## 5. NMR spectra

### 5.1. *N*-(4-aminophenyl)-2-propylpentanamide (11)

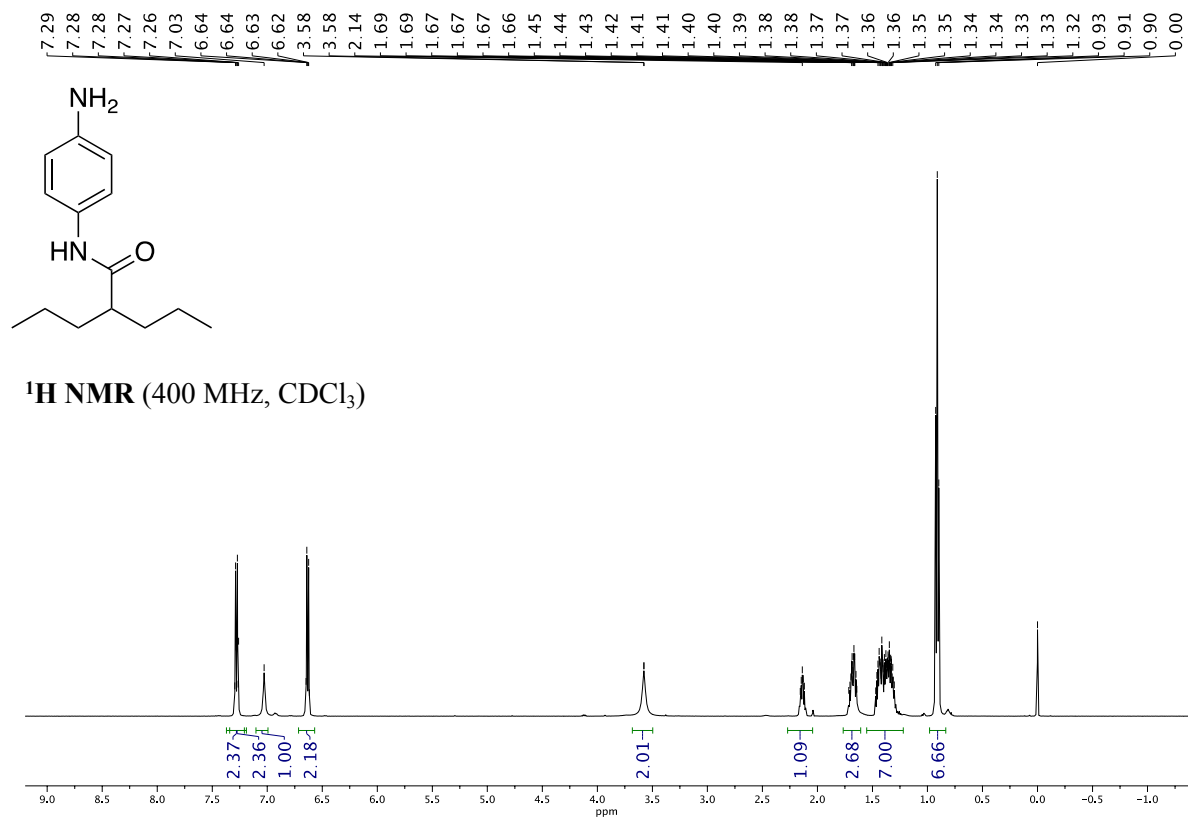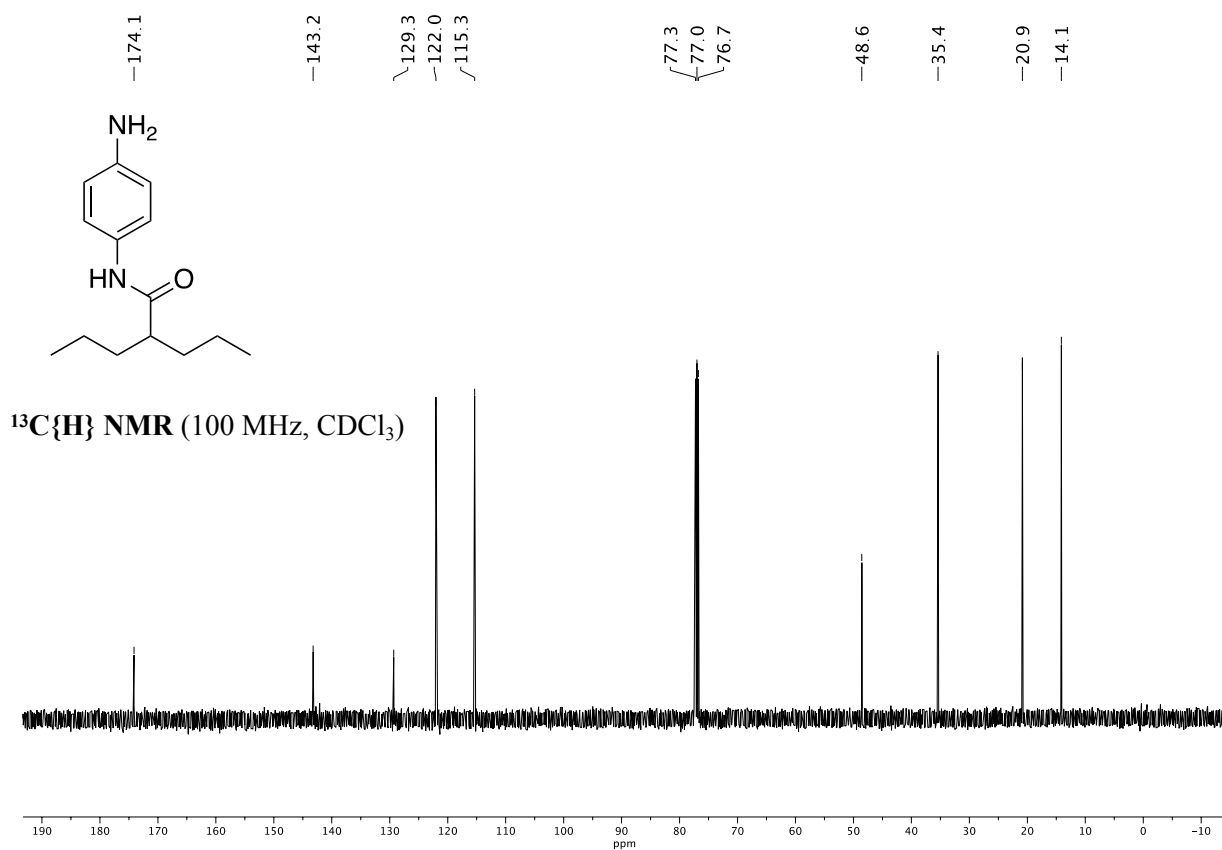

5.2. ((1*s*,3*s*)-adamantan-1-yl)(styryl)sulfane (17d) (two diastereoisomers)

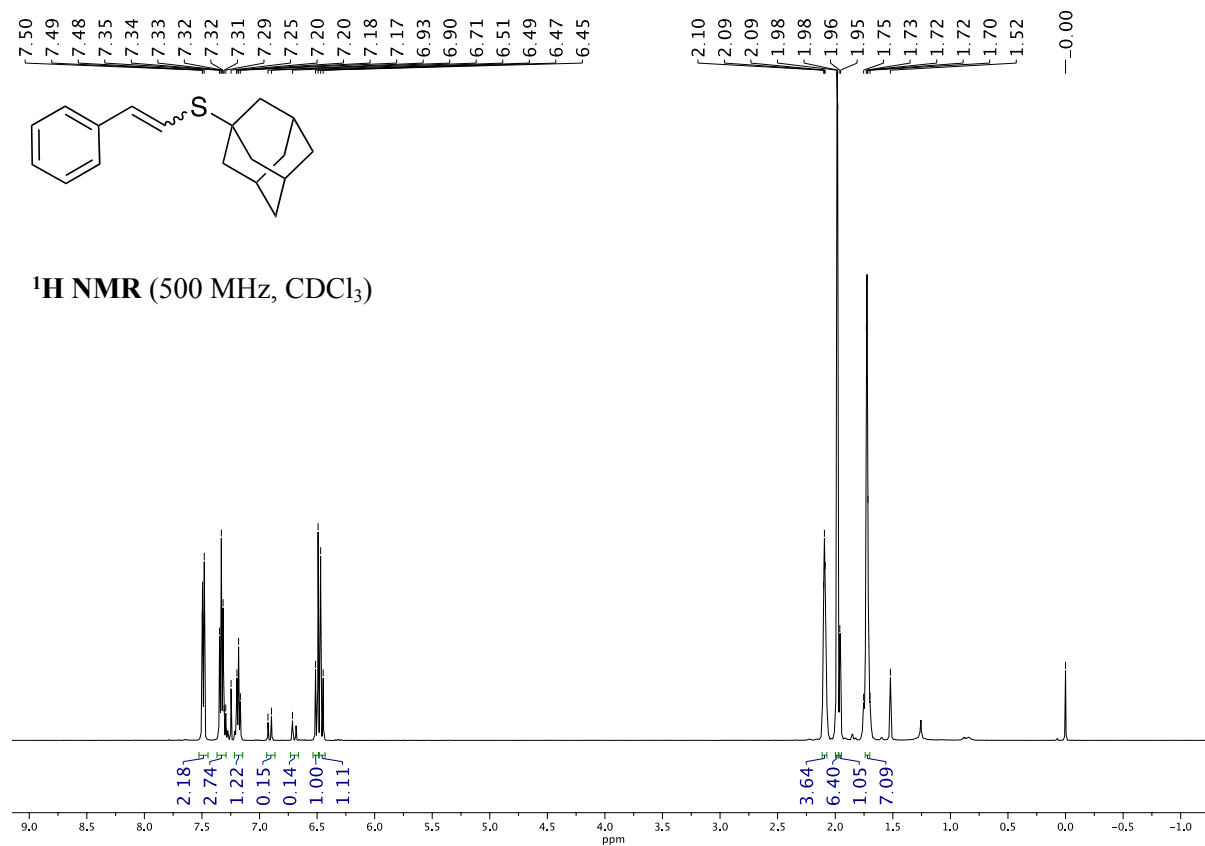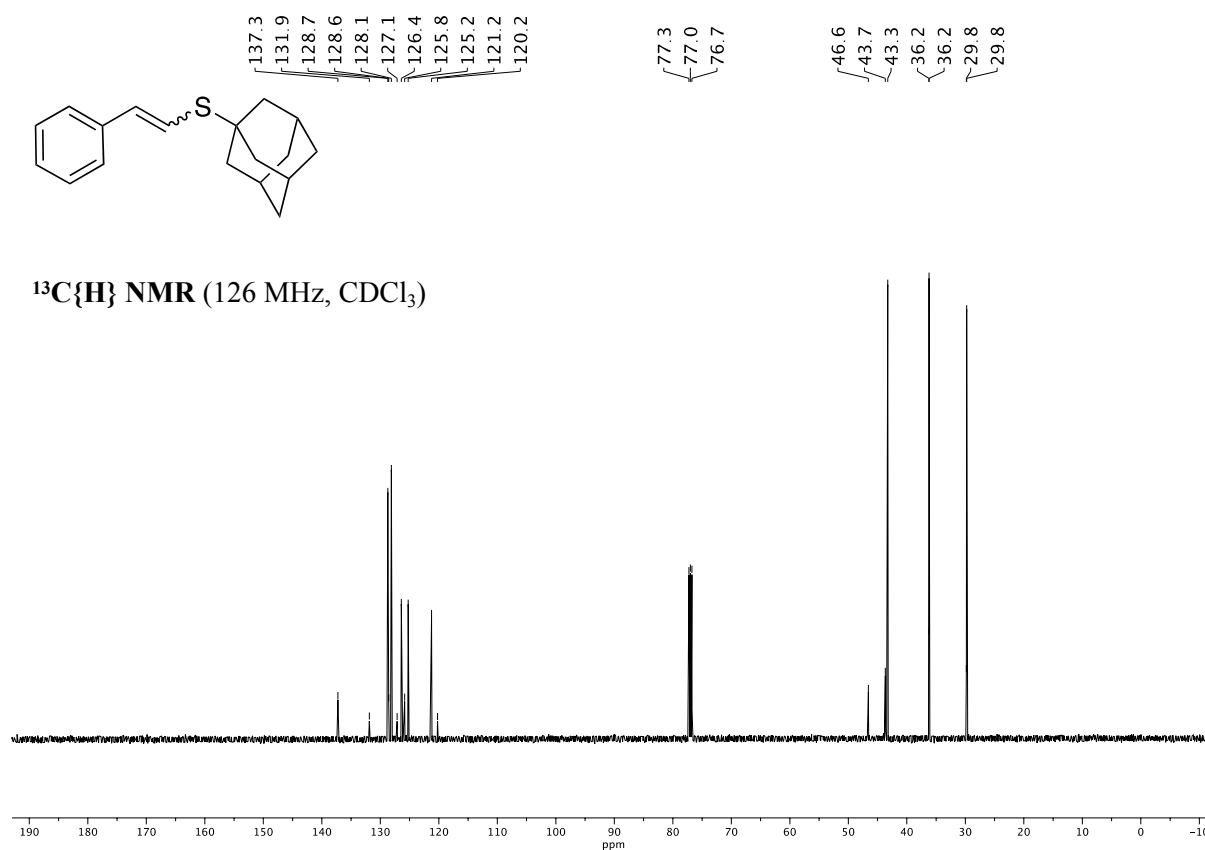

### 5.3. methyl *N*-(*tert*-butoxycarbonyl)-*S*-styryl-*L*-cysteinyl-*L*-phenylalaninate (17f)

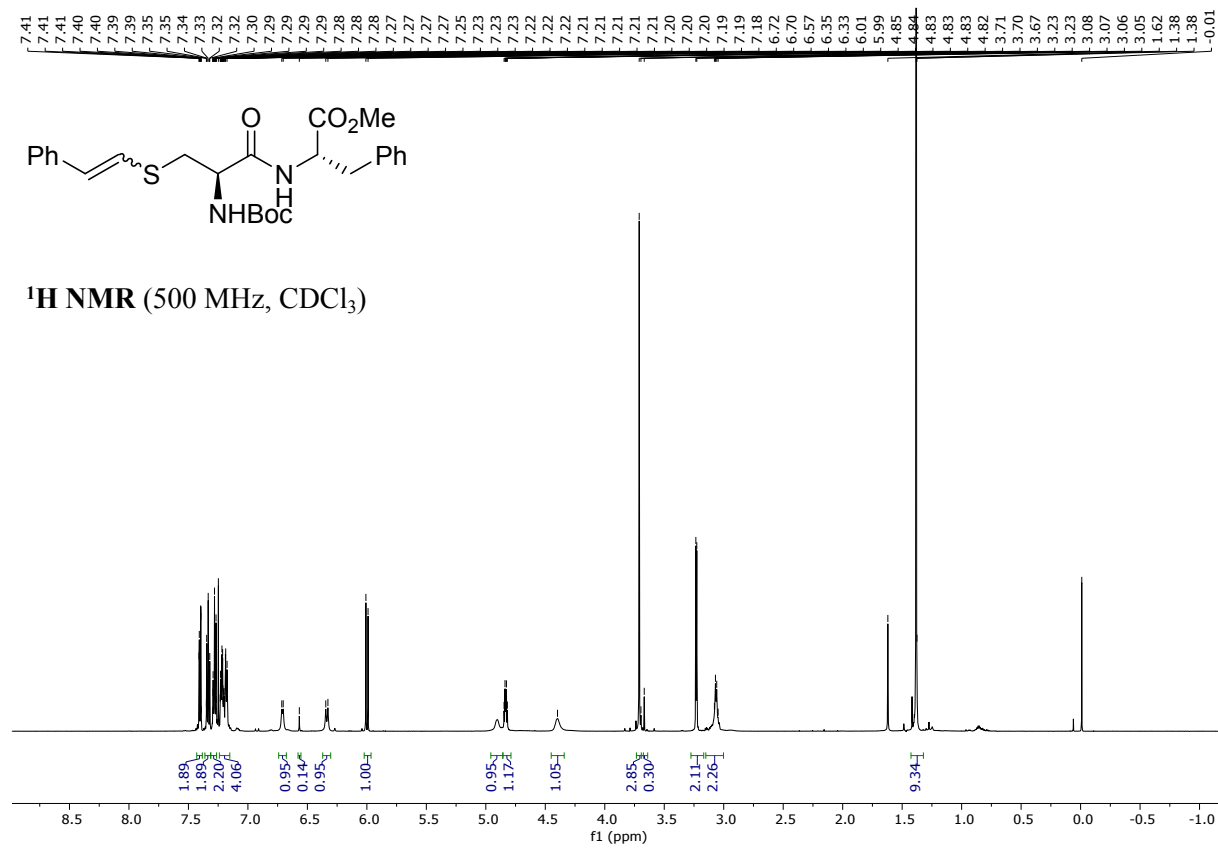

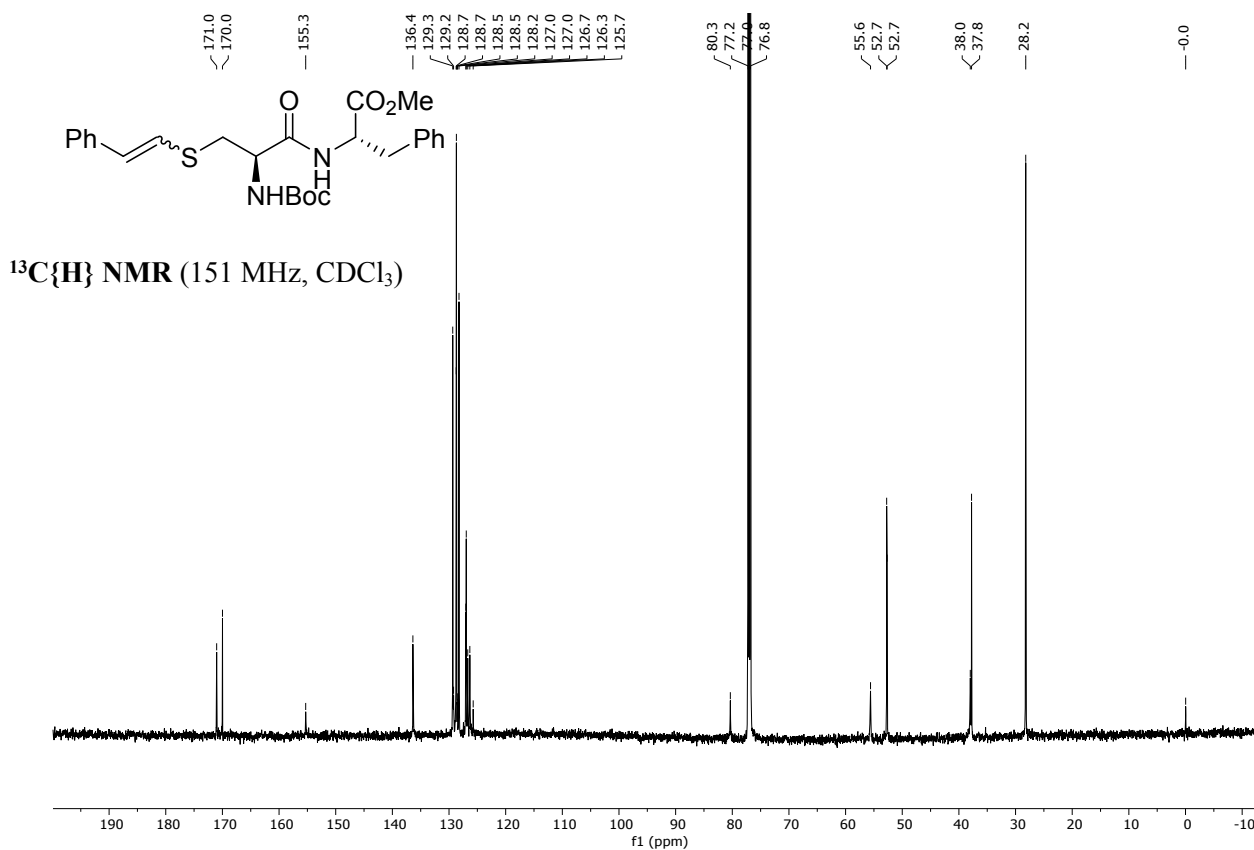

**5.4. (2*R*,3*R*,4*S*,5*R*,6*S*)-2-(acetoxymethyl)-6-((4-fluorostyryl)thio)tetrahydro-2*H*-pyran-3,4,5-triyl triacetate (17h) (two diastereoisomers)**

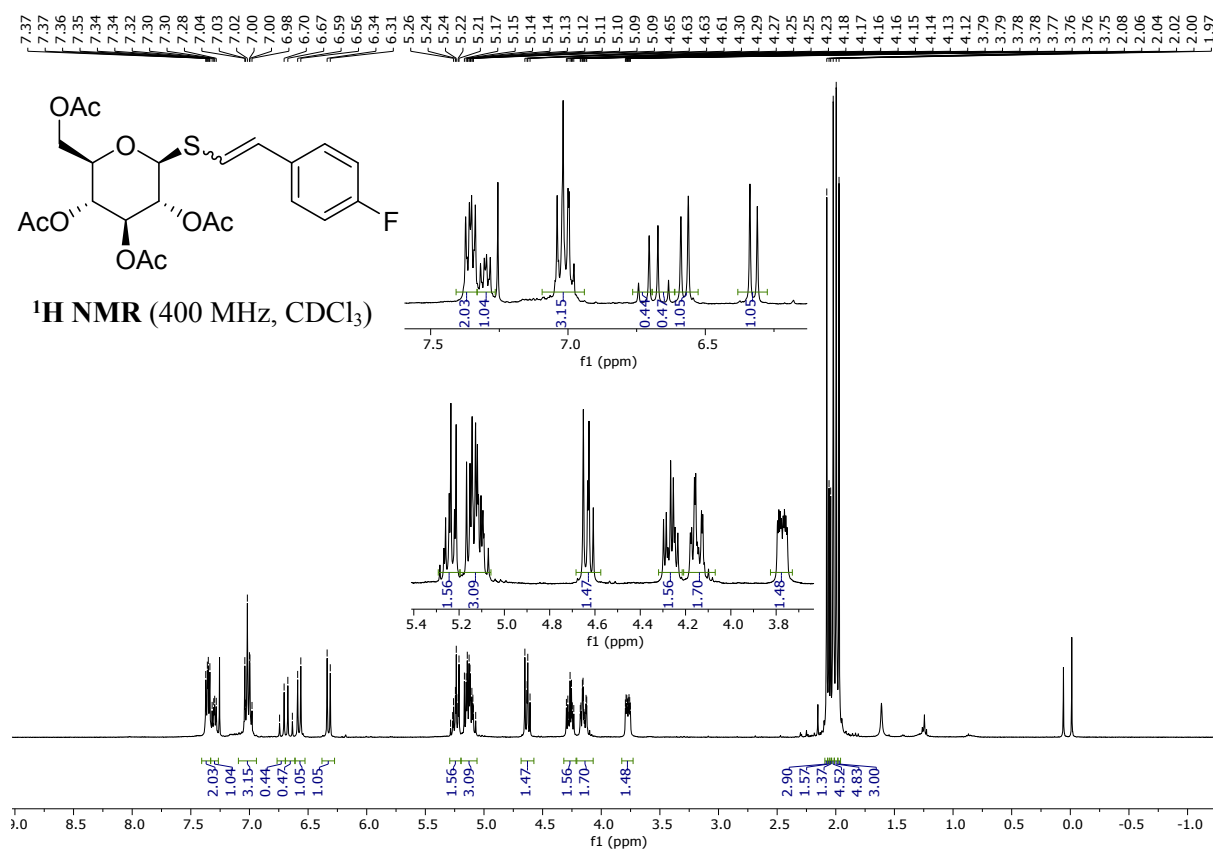

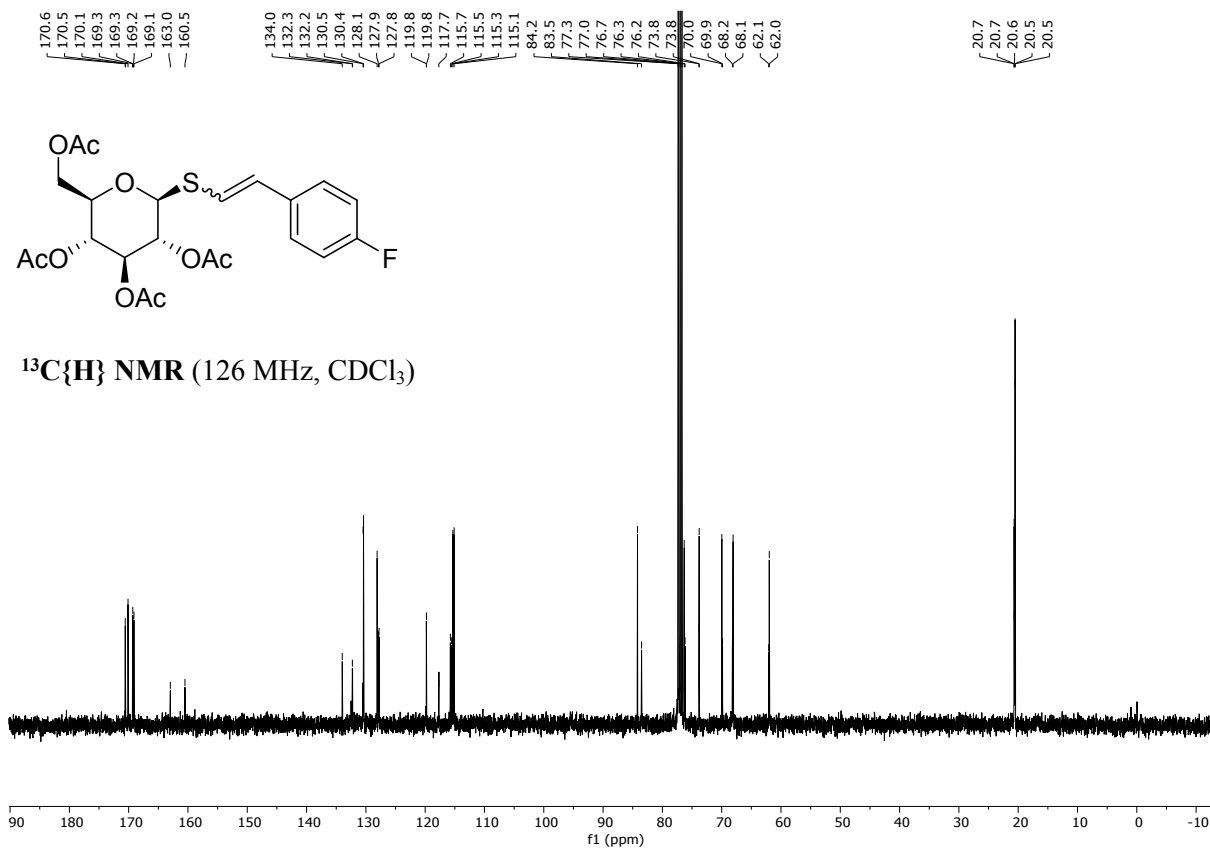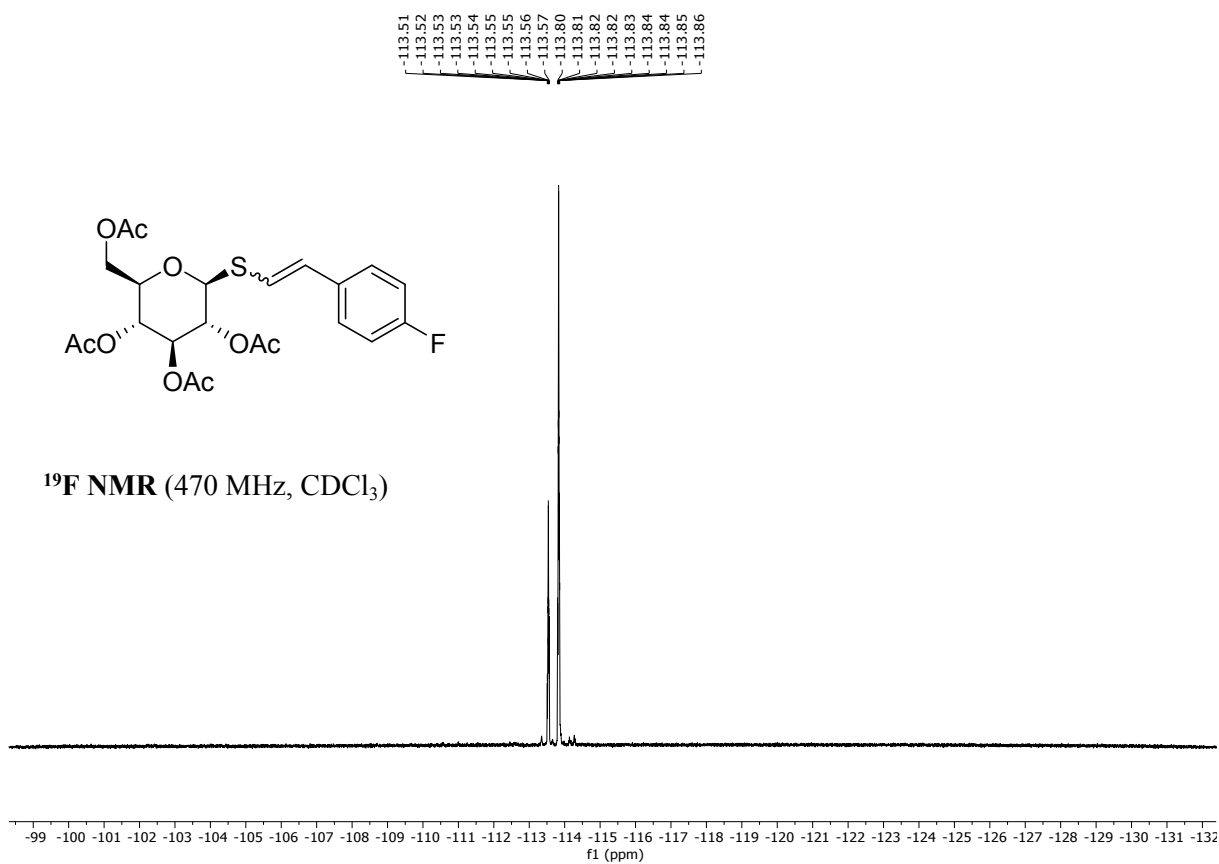

5.5. (2*R*,3*R*,4*S*,5*R*,6*S*)-2-(acetoxymethyl)-6-((4-methoxystyryl)thio)tetrahydro-2*H*-pyran-3,4,5-triyl triacetate (17i) (two diastereoisomers)

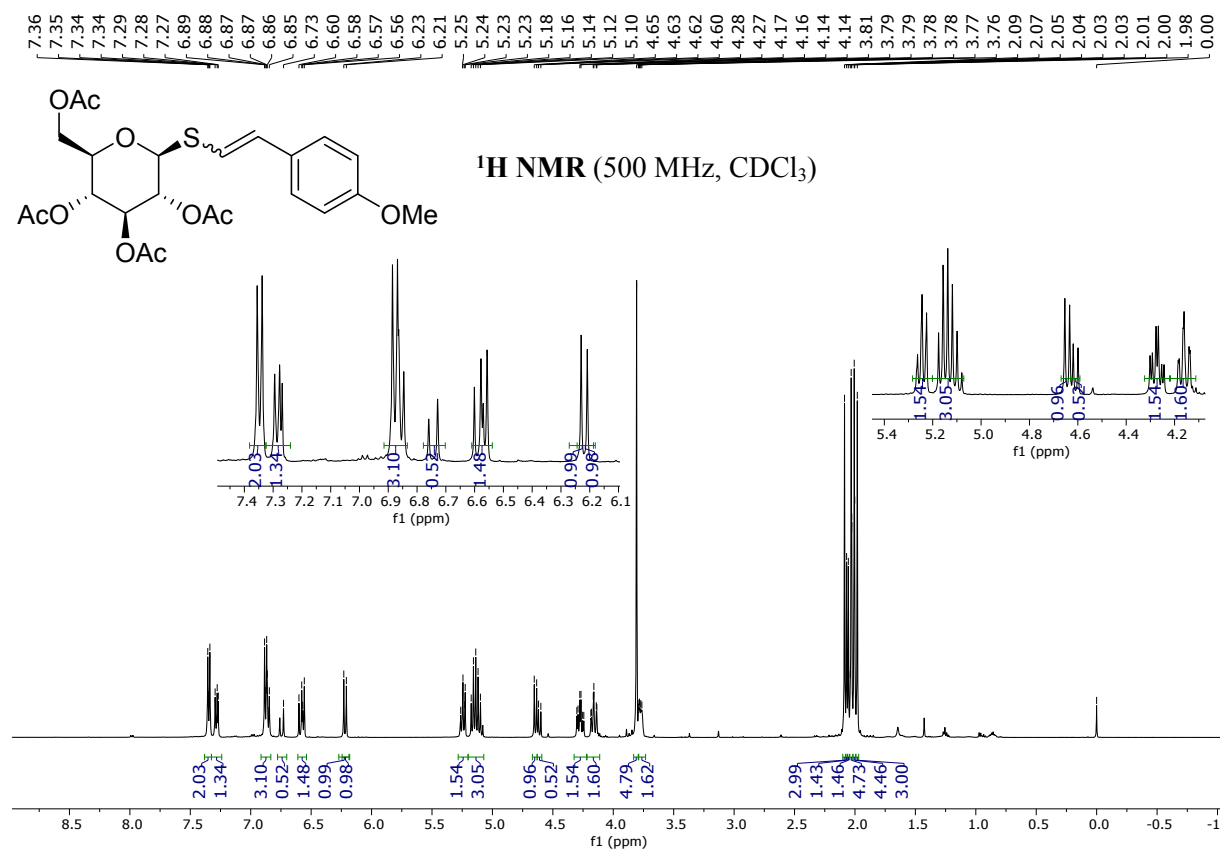

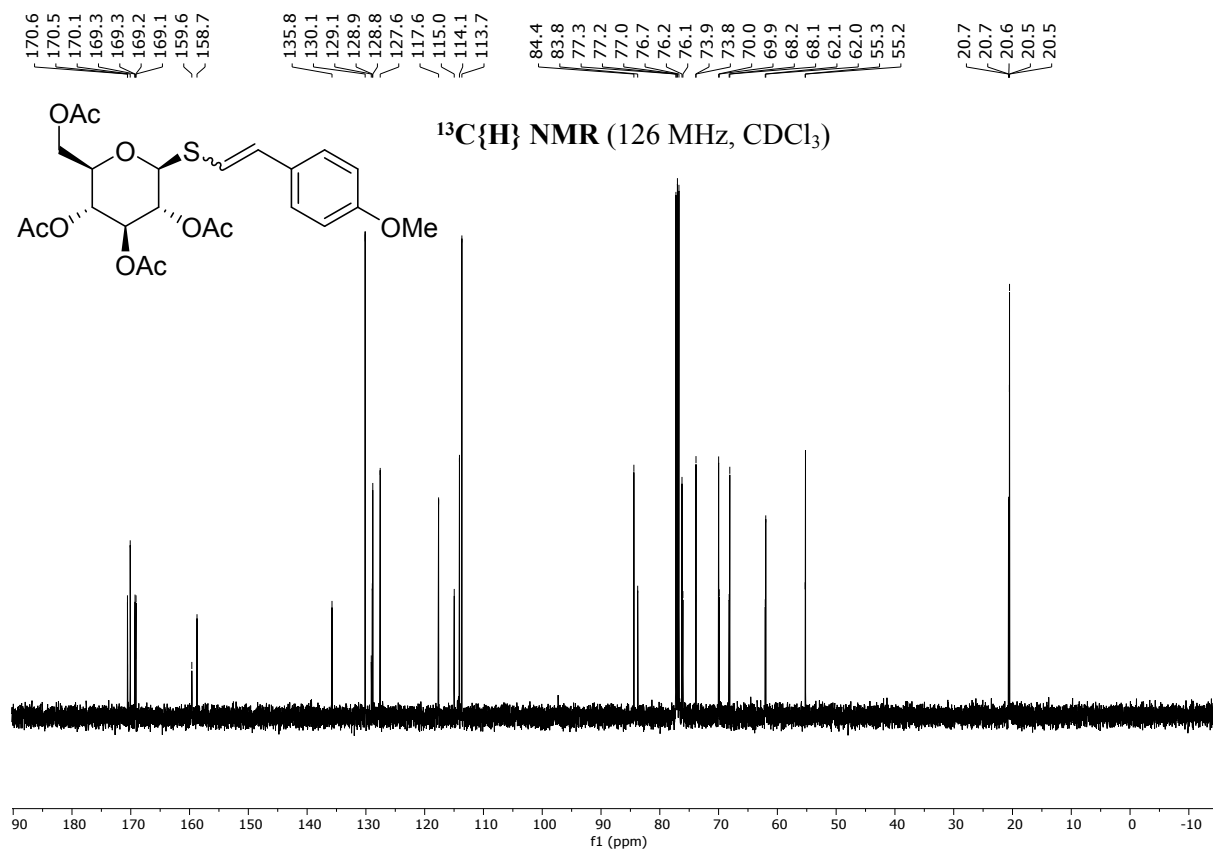

**5.6. (2*R*,3*R*,4*S*,5*R*,6*S*)-2-(acetoxymethyl)-6-((1,2-diphenylvinyl)thio)tetrahydro-2*H*-pyran-3,4,5-triyl triacetate (**17j**) (two diastereoisomers)**

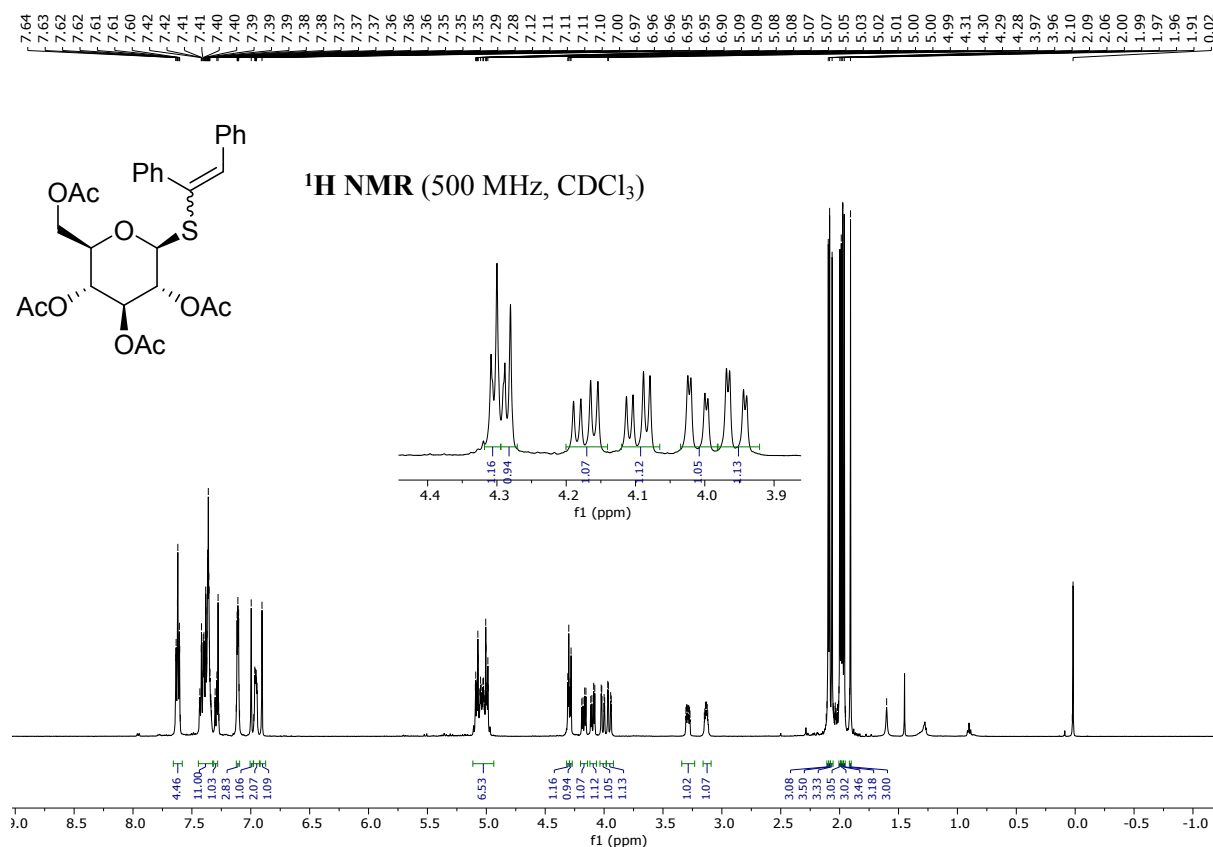

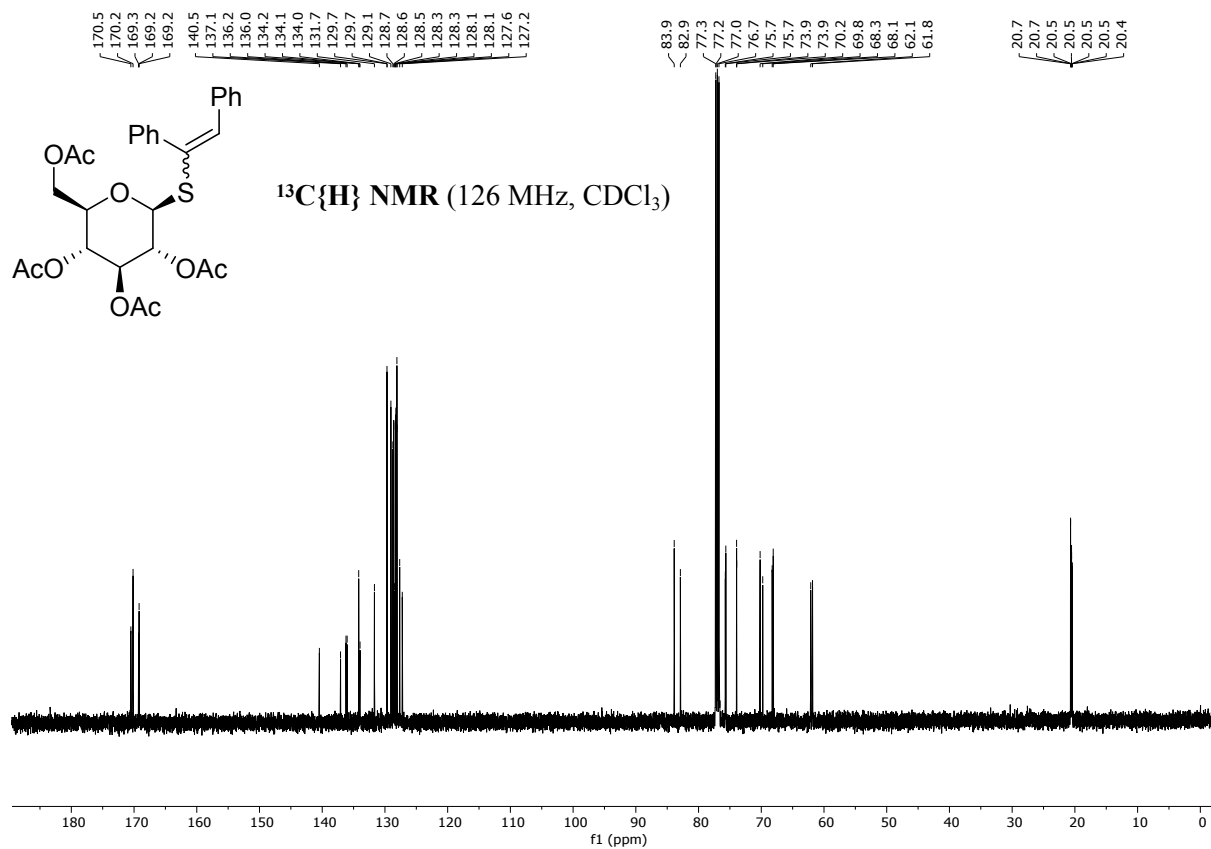

5.7. (2*R*,3*R*,4*S*,5*R*,6*S*)-2-(acetoxymethyl)-6-(oct-1-en-1-ylthio)tetrahydro-2*H*-pyran-3,4,5-triyl triacetate (**17k**) (two diastereoisomers)



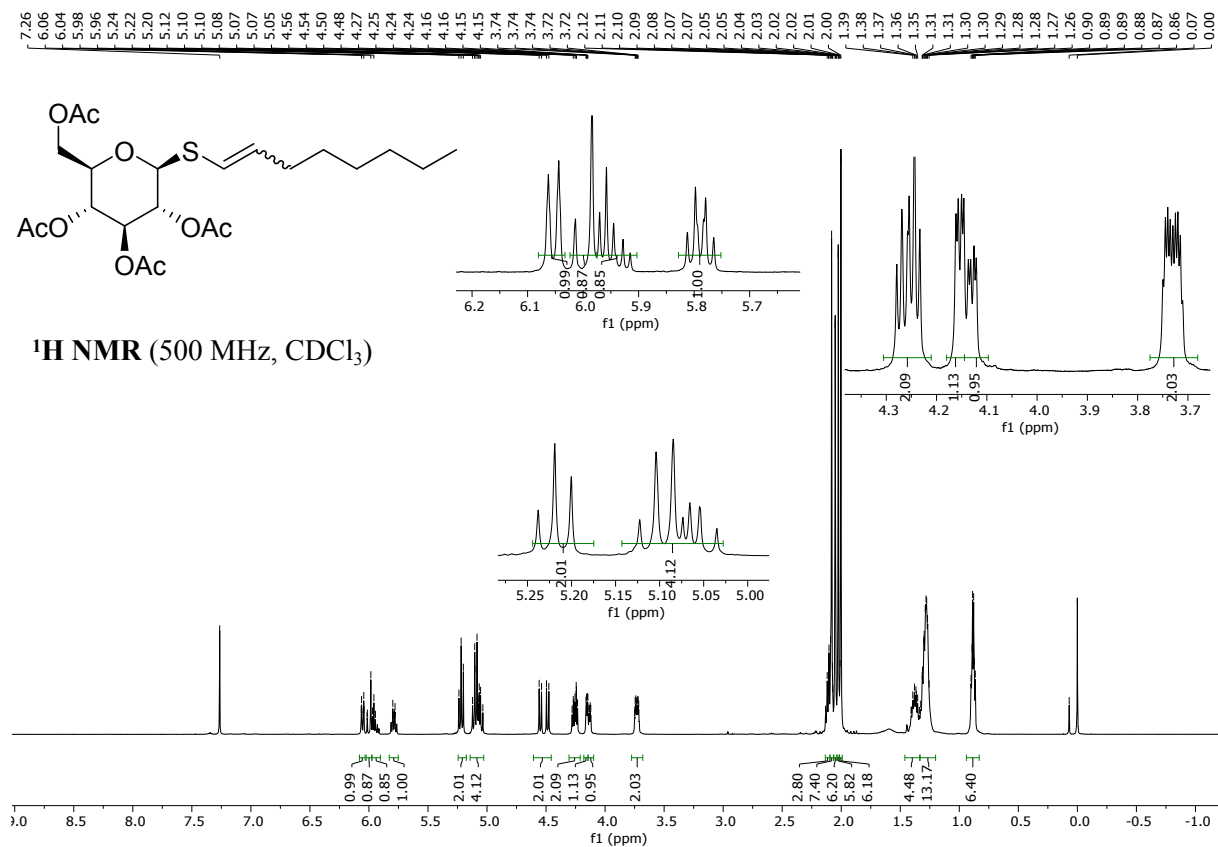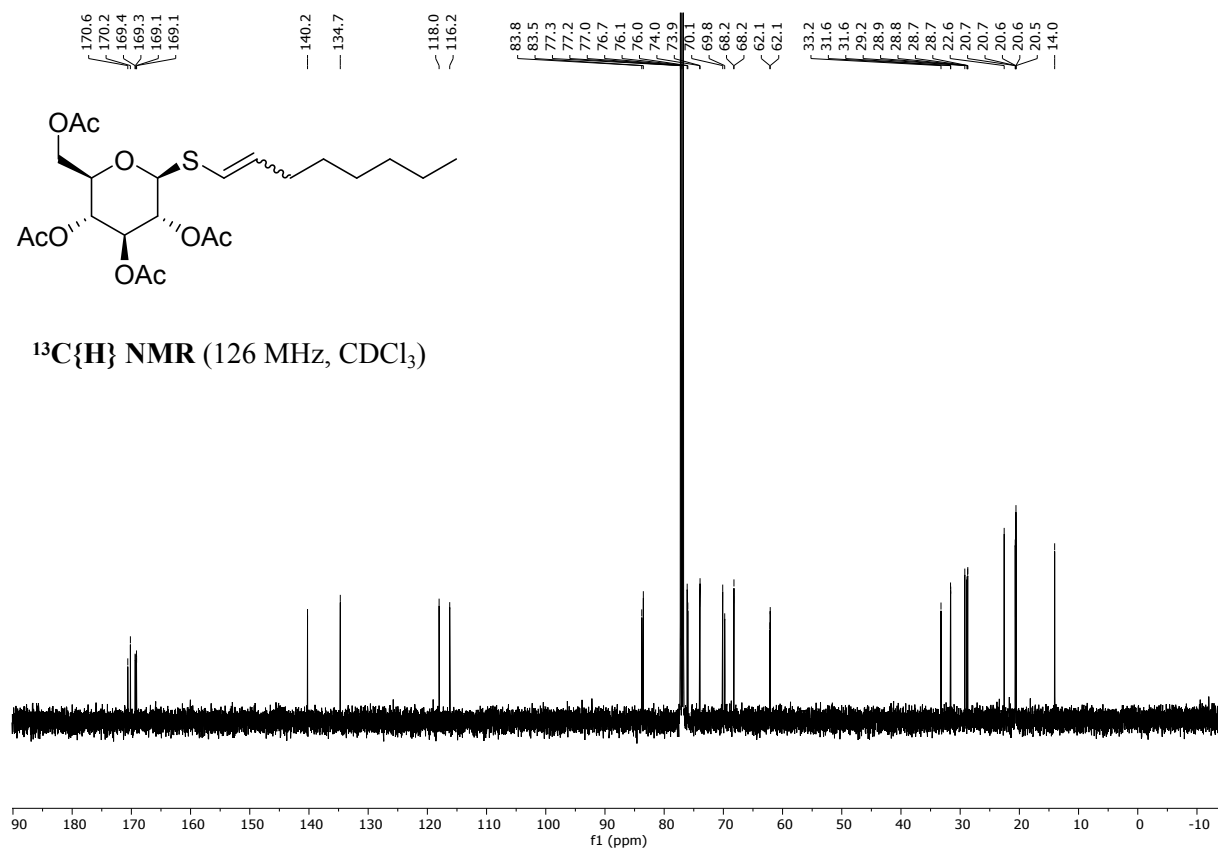

5.8. (2*R*,3*R*,4*S*,5*R*,6*S*)-2-(acetoxymethyl)-6-((3-(benzoyloxy)prop-1-en-1-yl)thio)tetrahydro-2*H*-pyran-3,4,5-triyl triacetate (171) (two diastereoisomers)

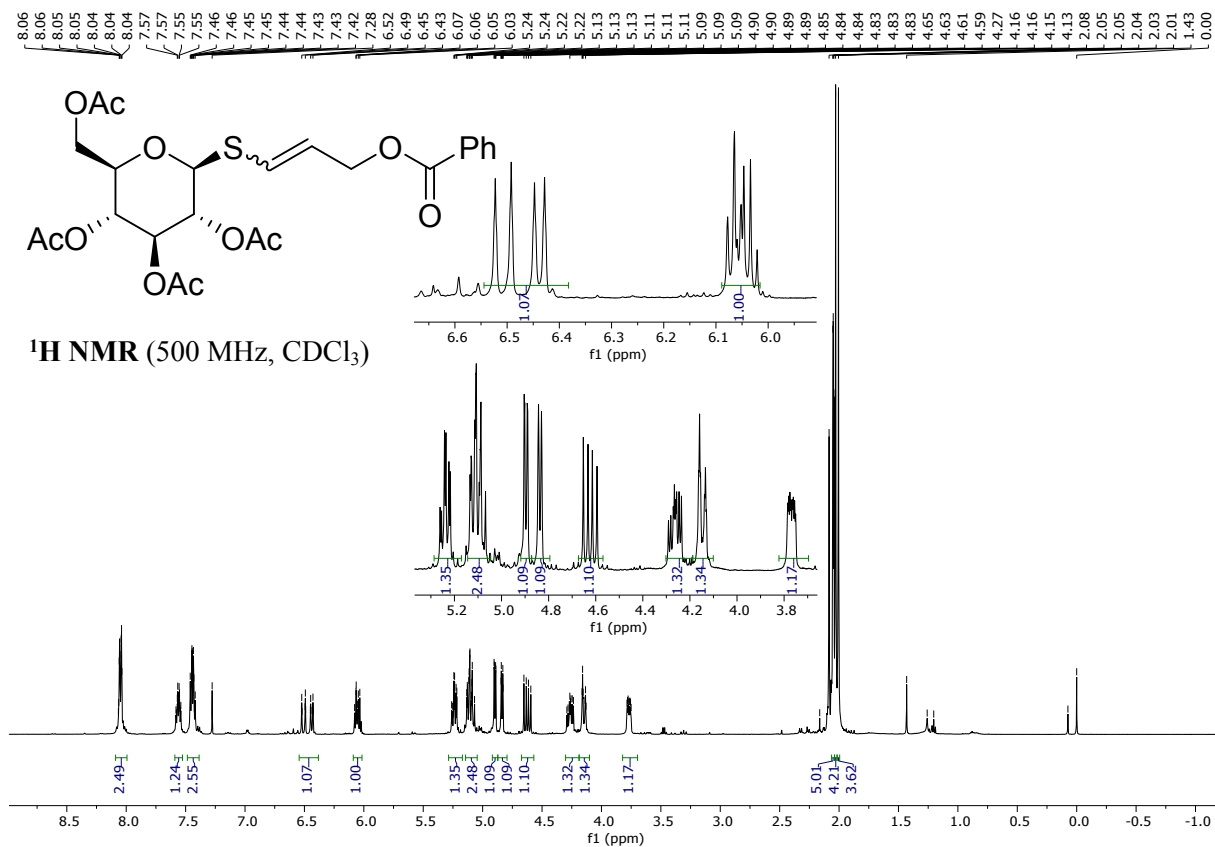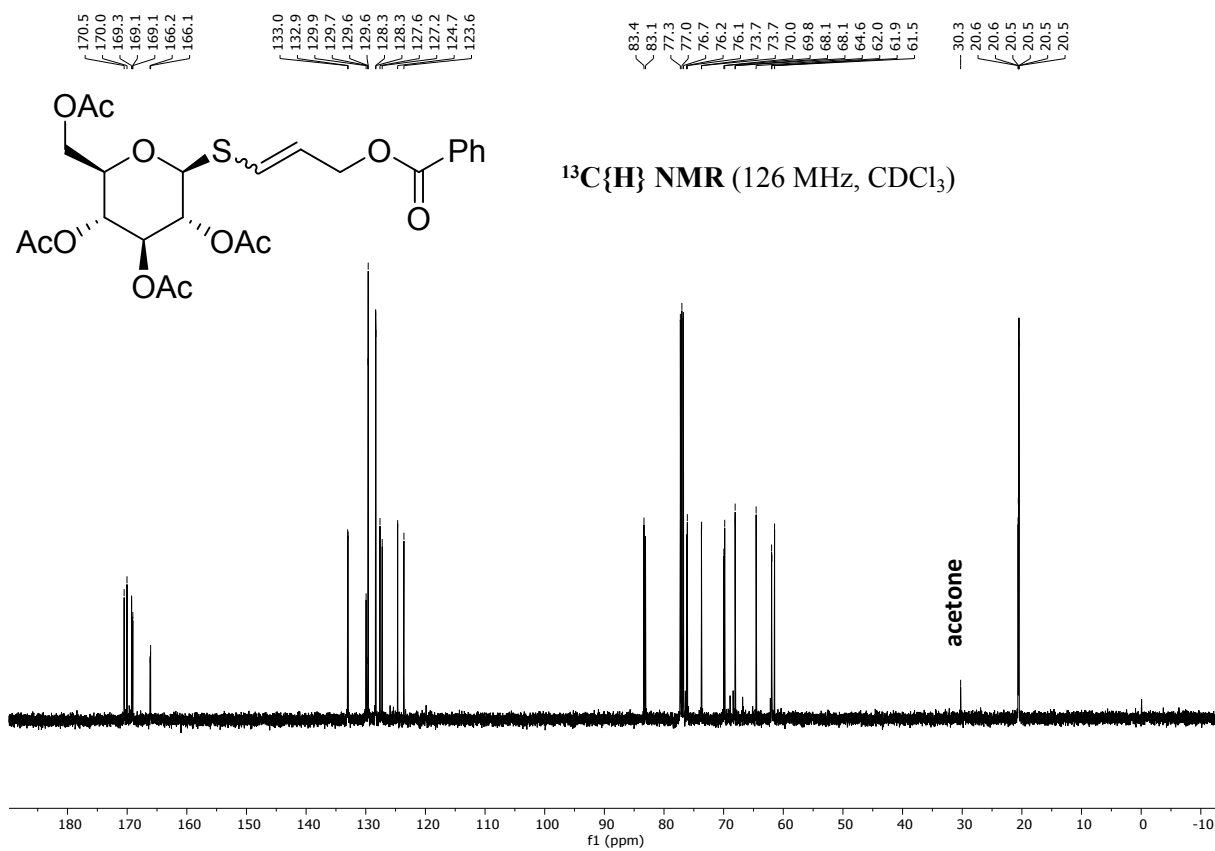

5.9. 1-benzyl 4-(3-(((2*S*,3*R*,4*S*,5*R*,6*R*)-3,4,5-triacetoxy-6-(acetoxymethyl)tetrahydro-2*H*-pyran-2-yl)thio)allyl) (*tert*-butoxycarbonyl)-*L*-aspartate (17n) (two diastereoisomers)

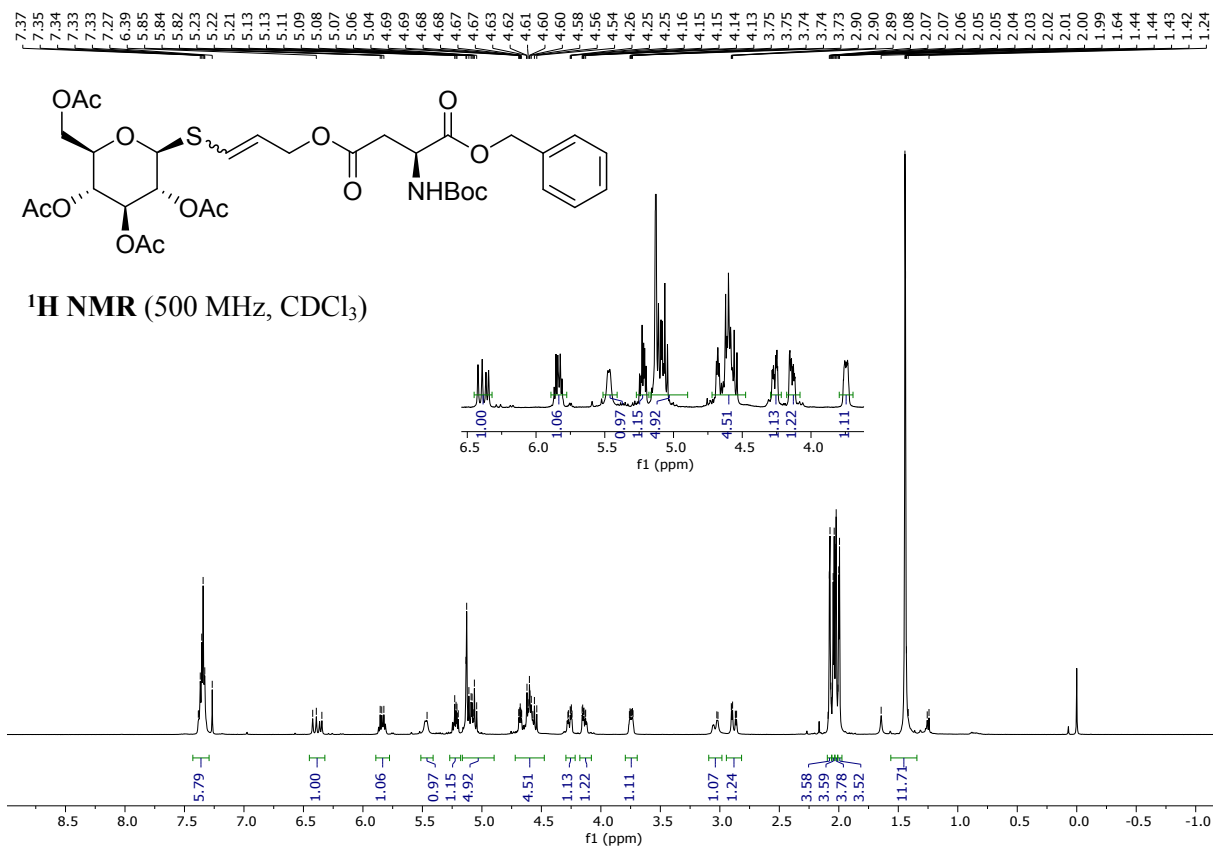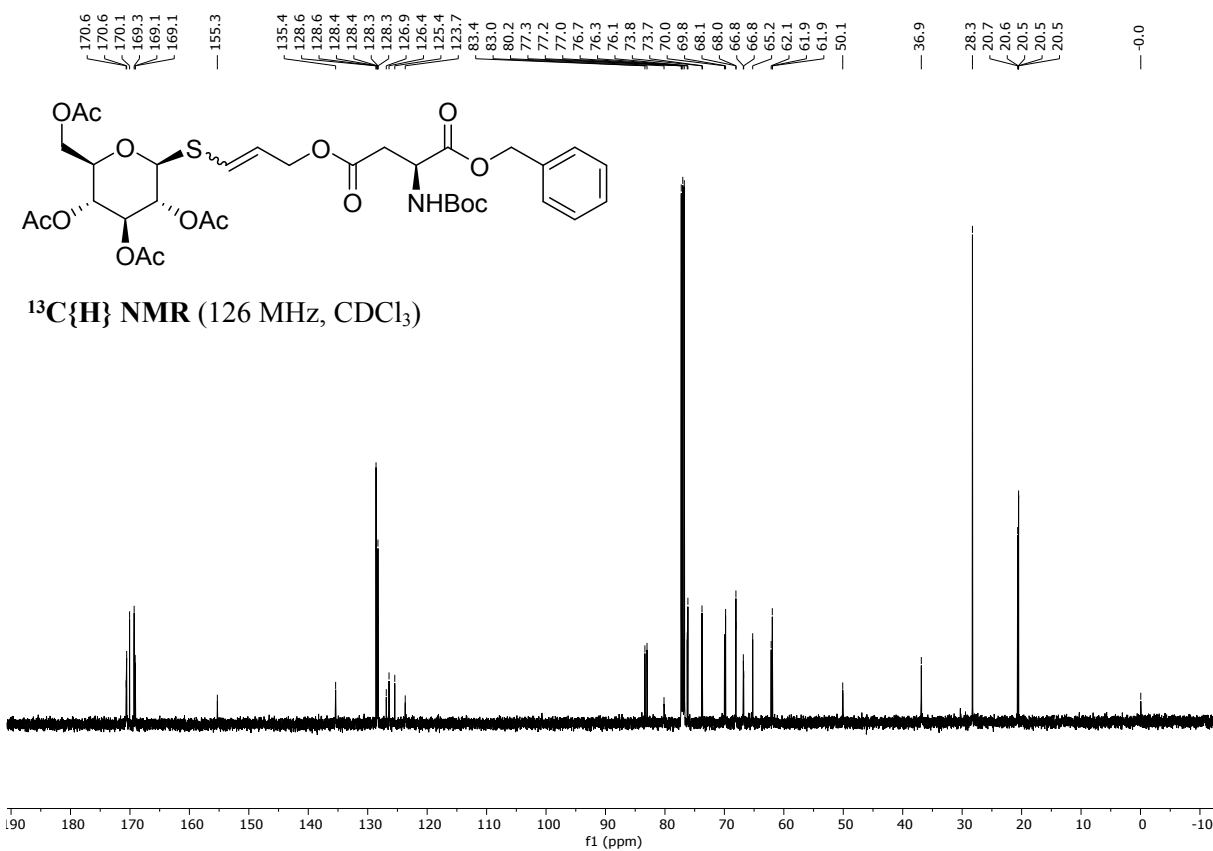

### 5.10. 1-(4-phenylbut-3-yn-1-yl)-4-(trifluoromethyl)benzene (20c)

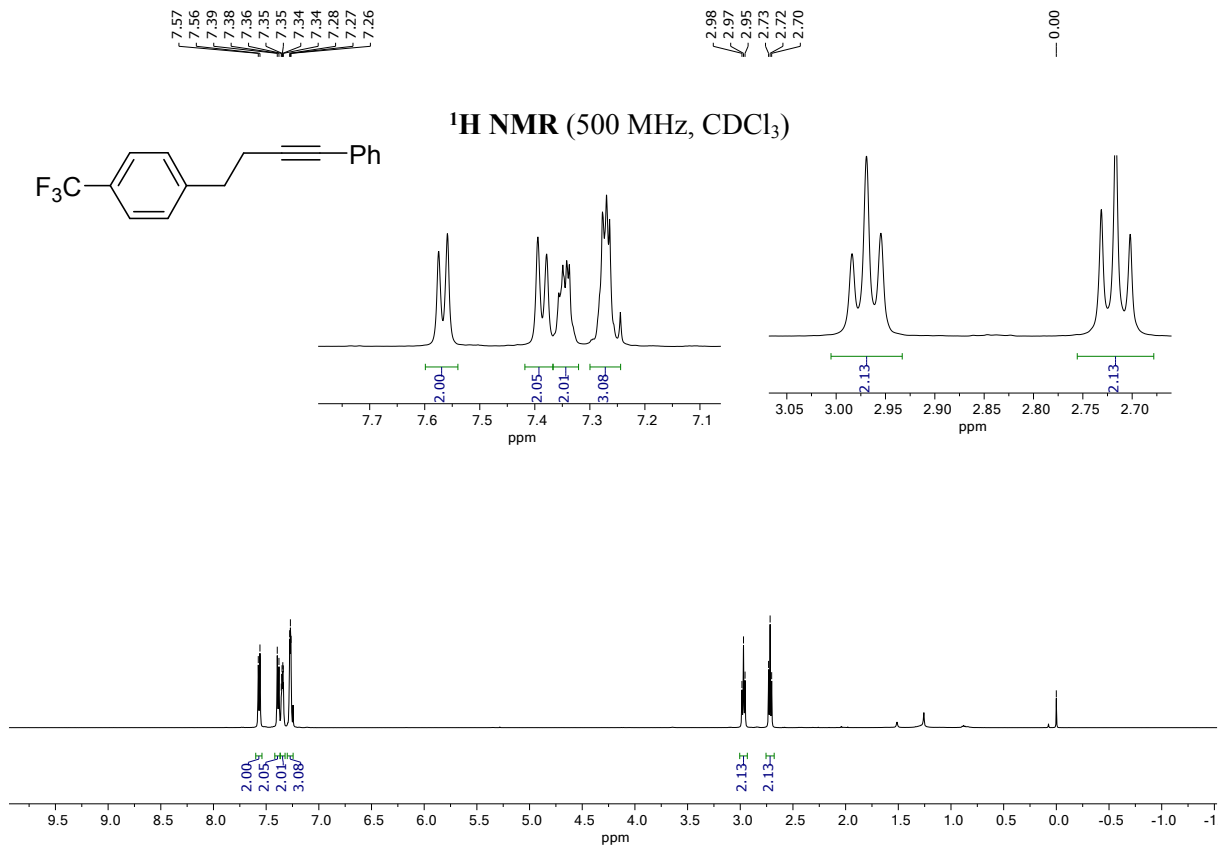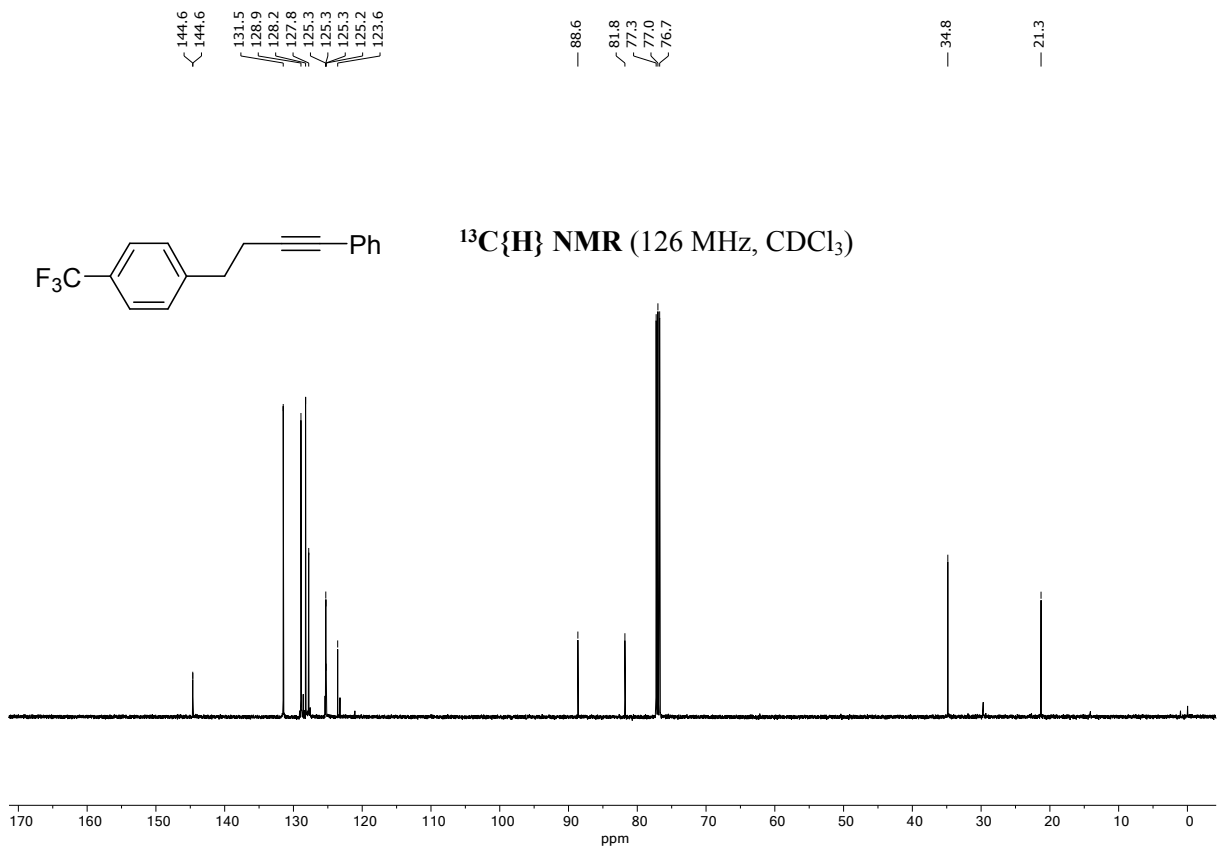

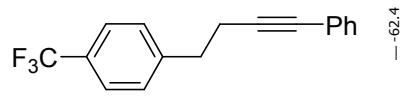

<sup>19</sup>F NMR (376 MHz, CDCl<sub>3</sub>)

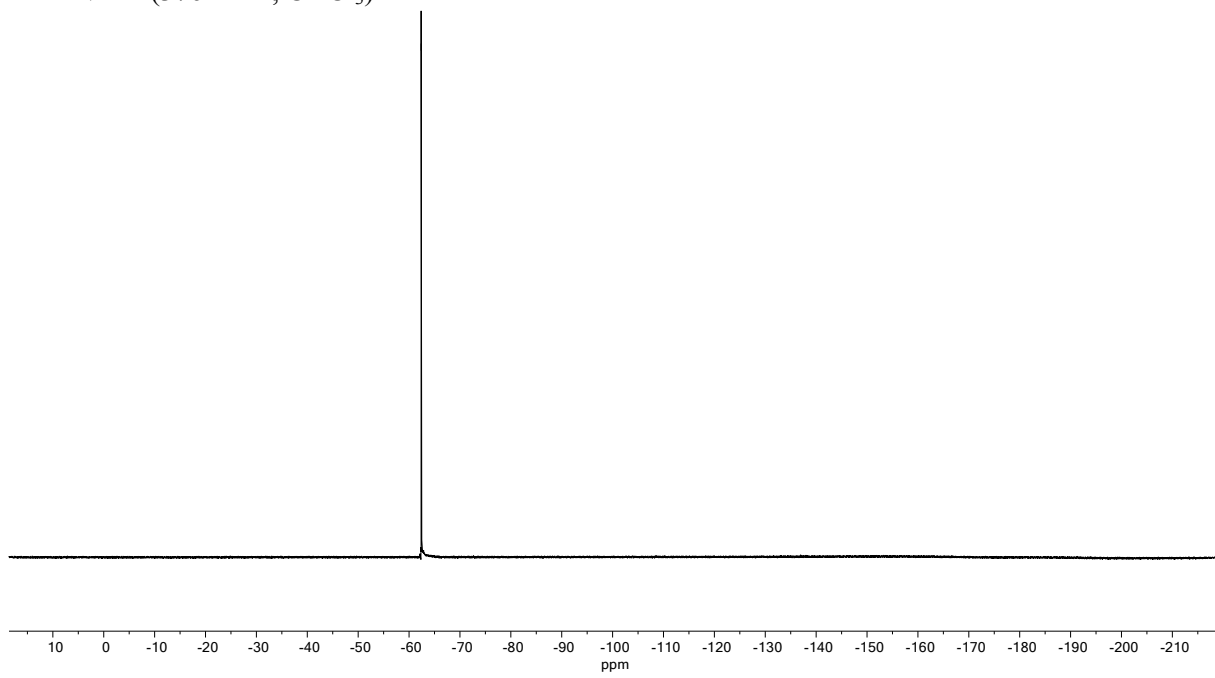

### 5.11. 1-(5-phenylpent-1-yn-1-yl)naphthalene (20f)

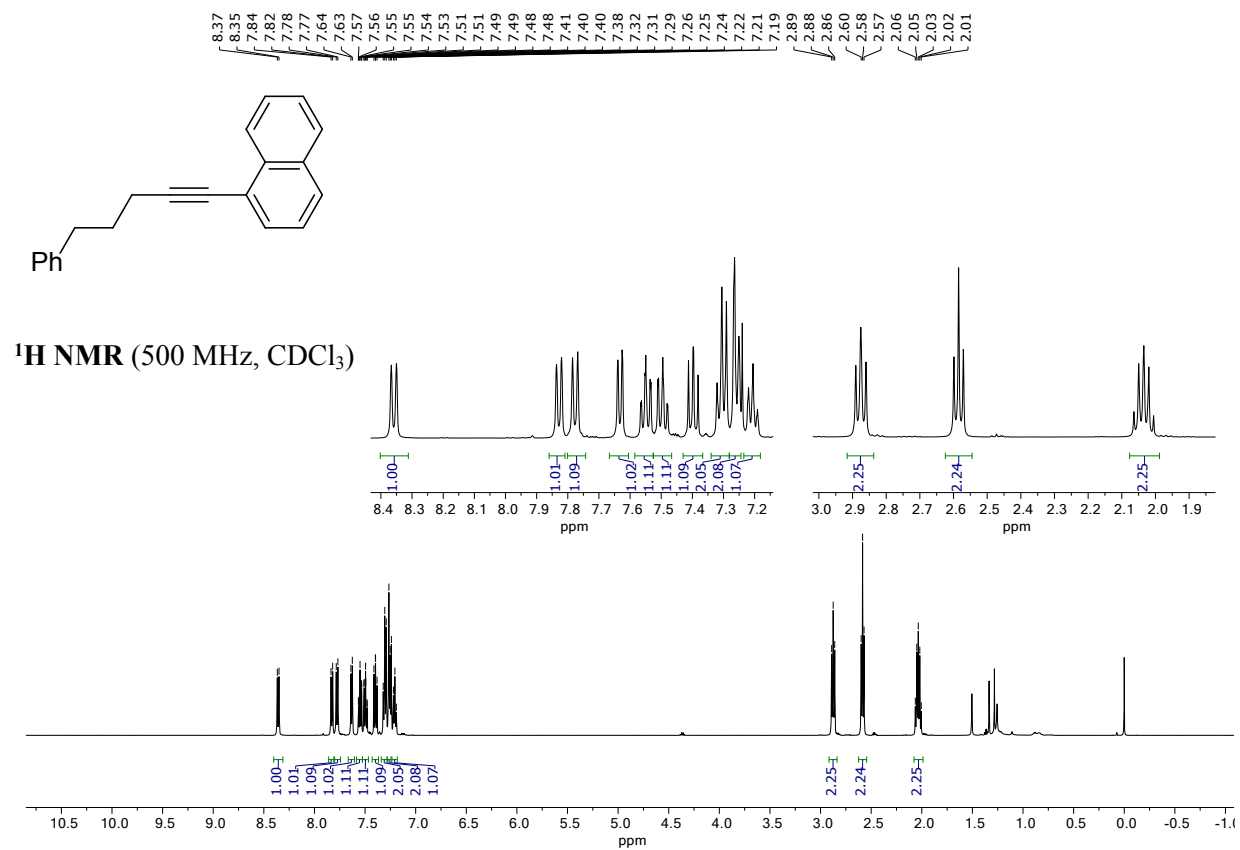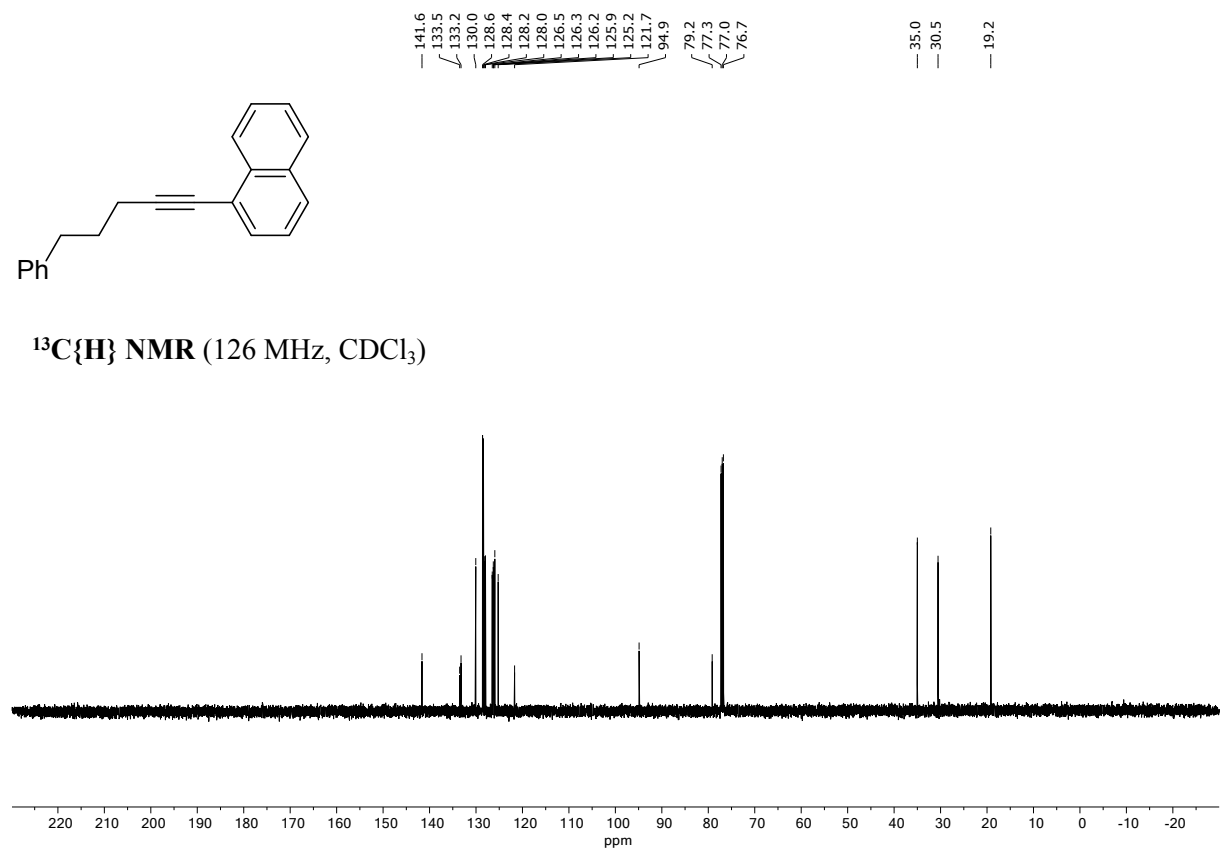

5.12. *tert*-butyldimethyl(3-(4-(4-(trifluoromethyl)phenyl)but-1-yn-1-yl)phenoxy)silane (20h)

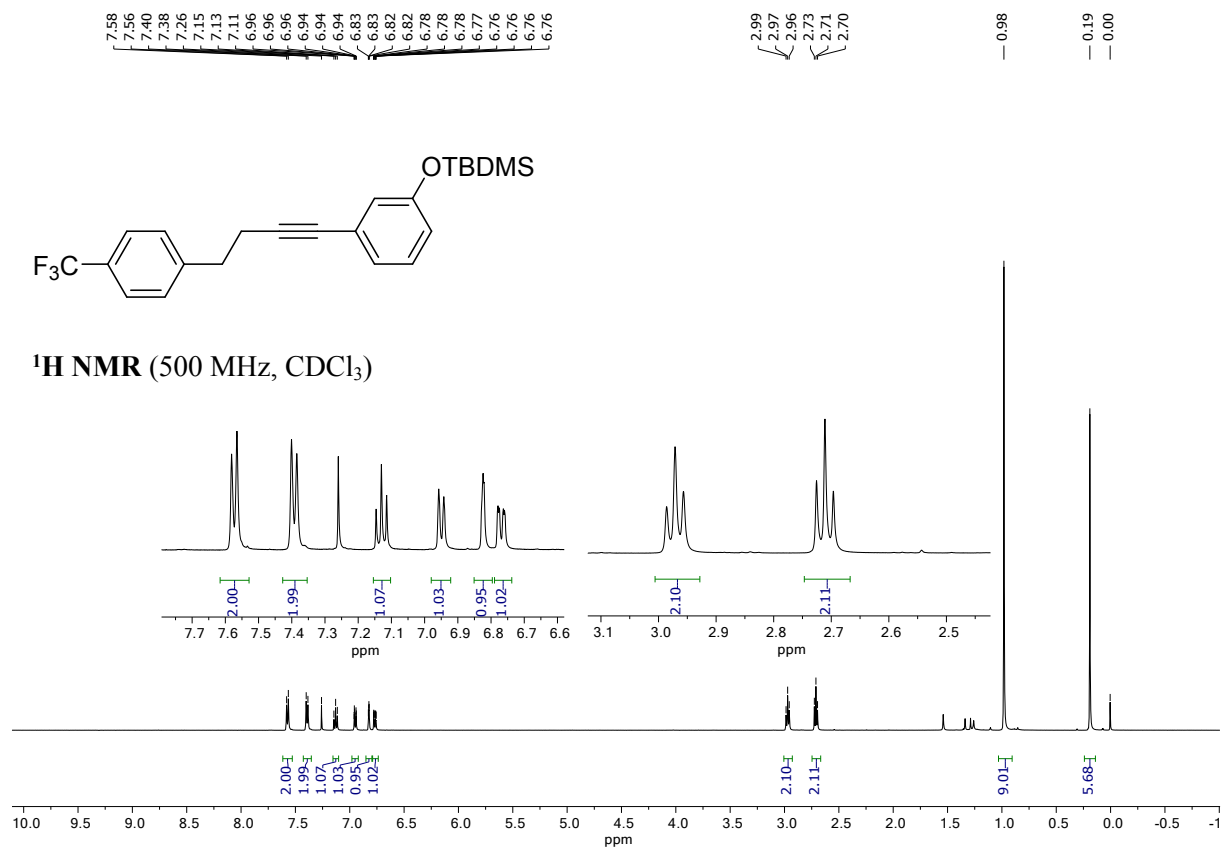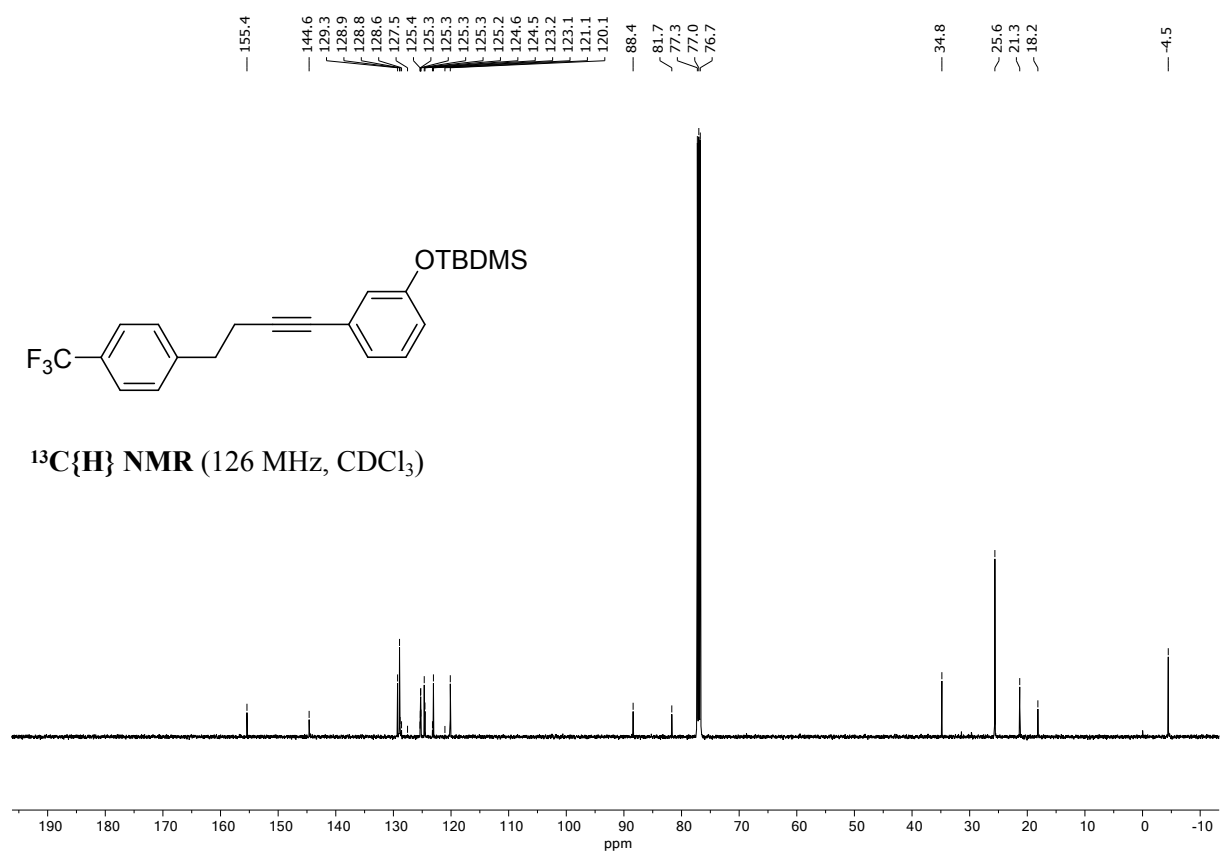

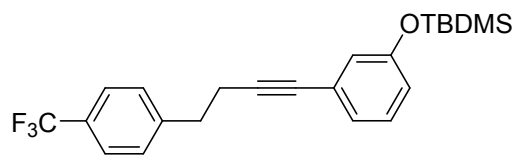

$^{19}F$  NMR (470 MHz,  $CDCl_3$ )

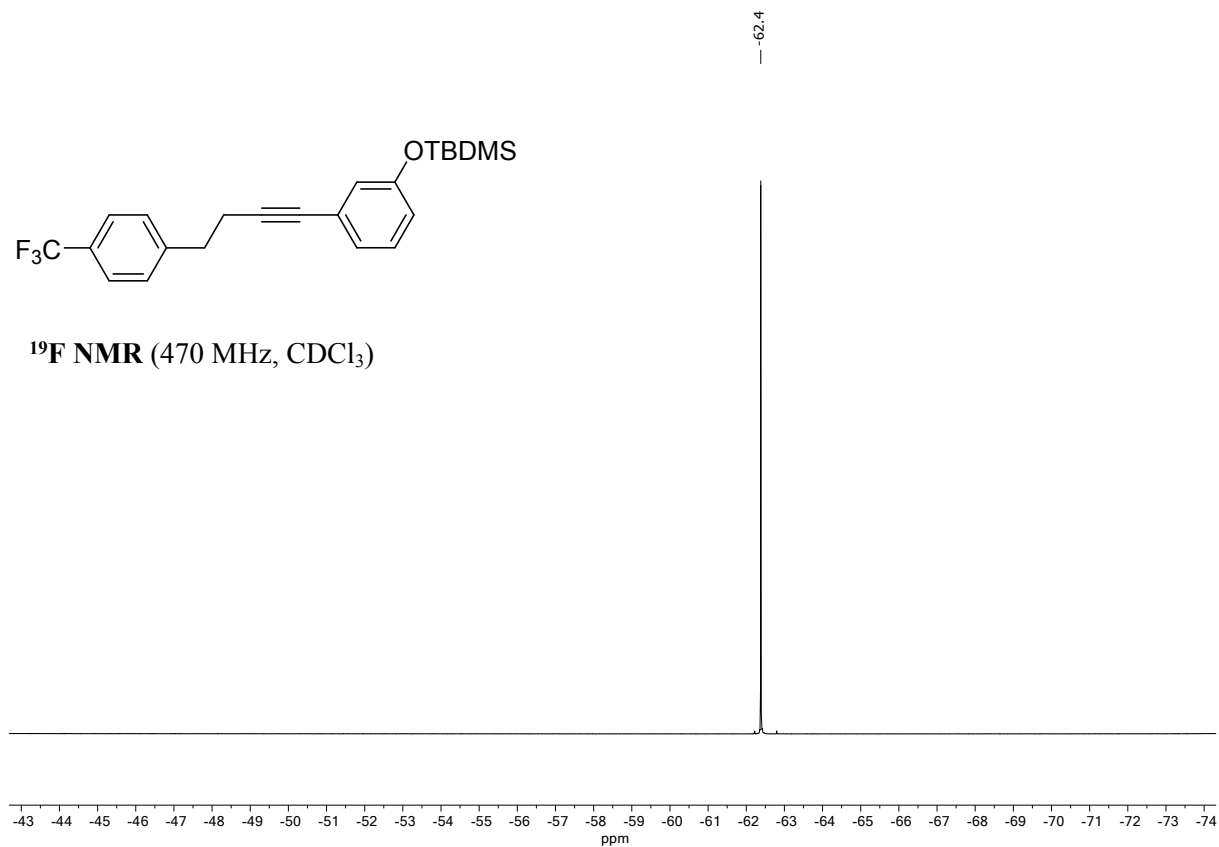



5.13. 3-(5-phenylpent-1-yn-1-yl)phenyl (4*R*)-4-((5*S*,9*S*,10*S*,13*R*,14*R*,17*R*)-10,13-dimethyl-3,7,12-trioxohexadecahydro-1*H*-cyclopenta[*a*]phenanthren-17-yl)pentanoate (20l)

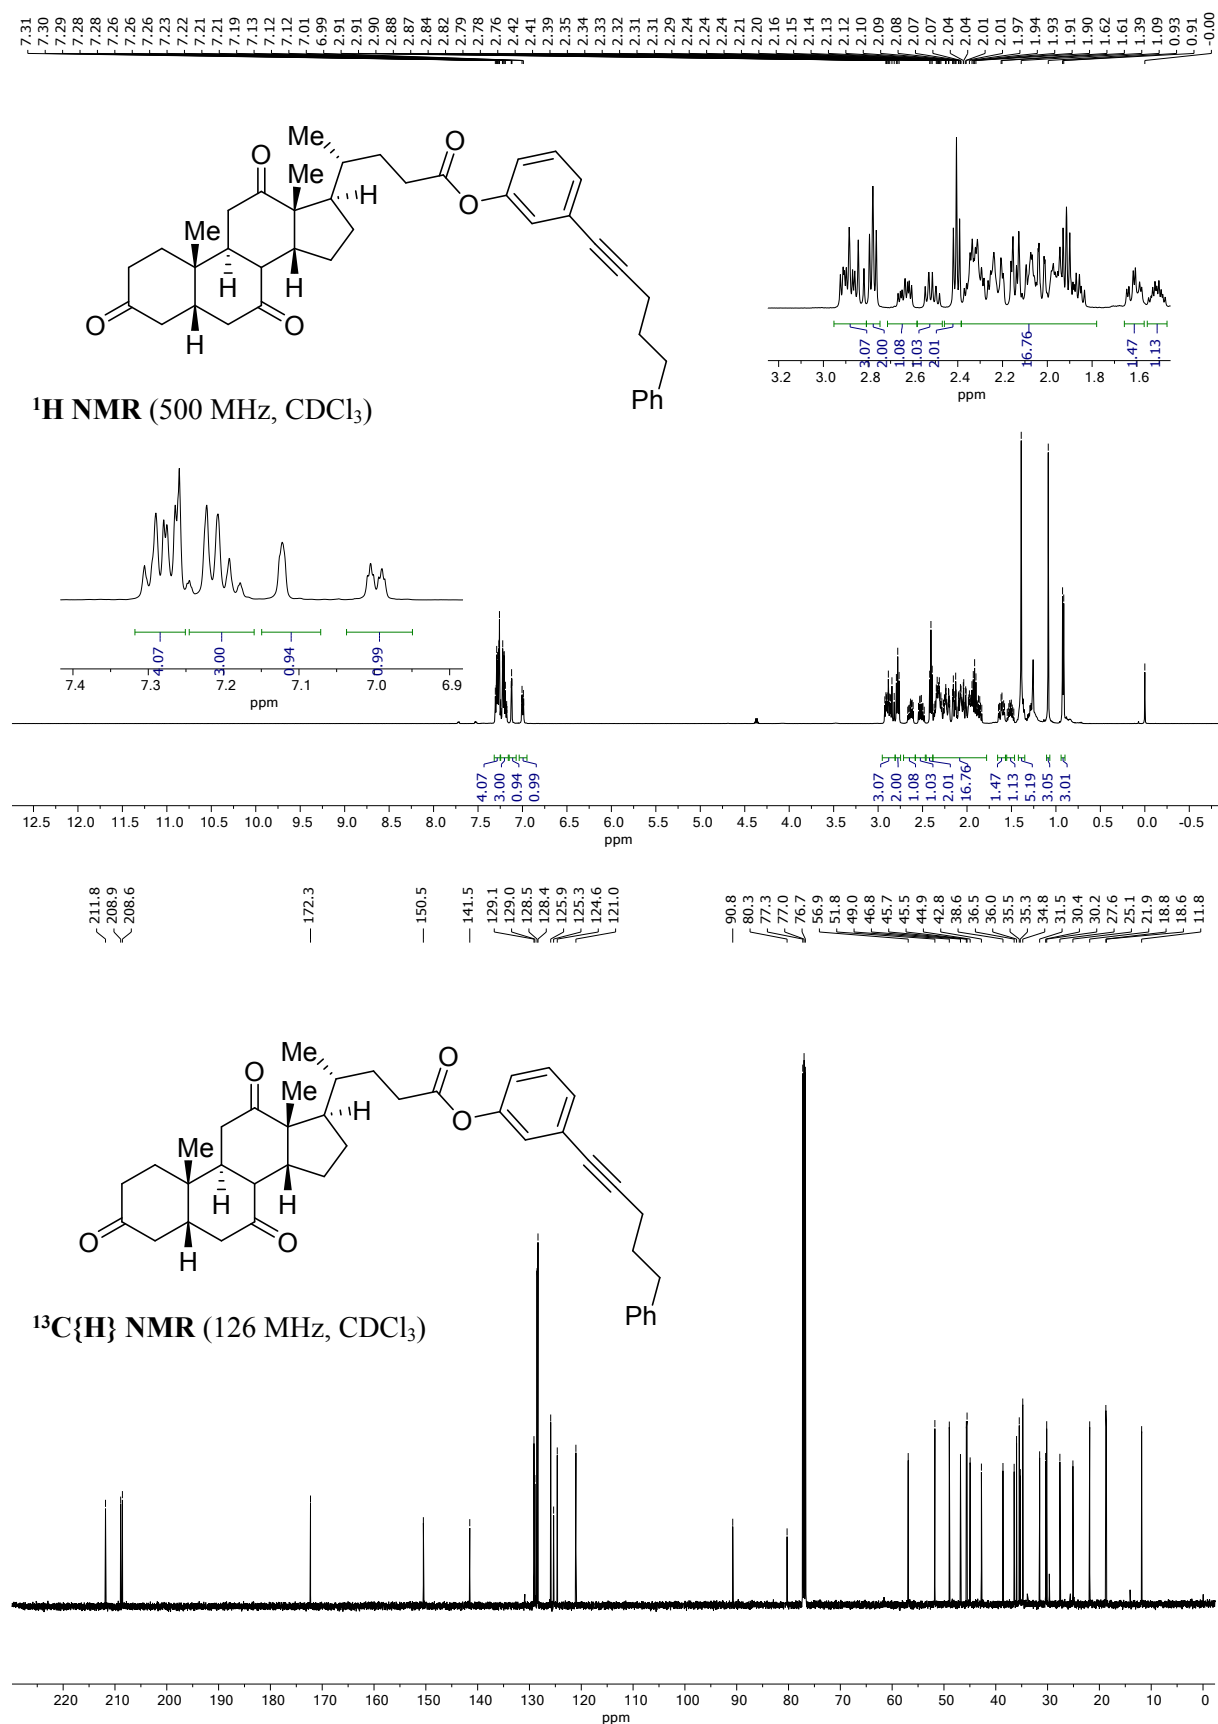

5.14. 3-(5-phenylpent-1-yn-1-yl)phenyl 2-(1-(4-chlorobenzoyl)-5-methoxy-2-methyl-1*H*-indol-3-yl)acetate (20n)

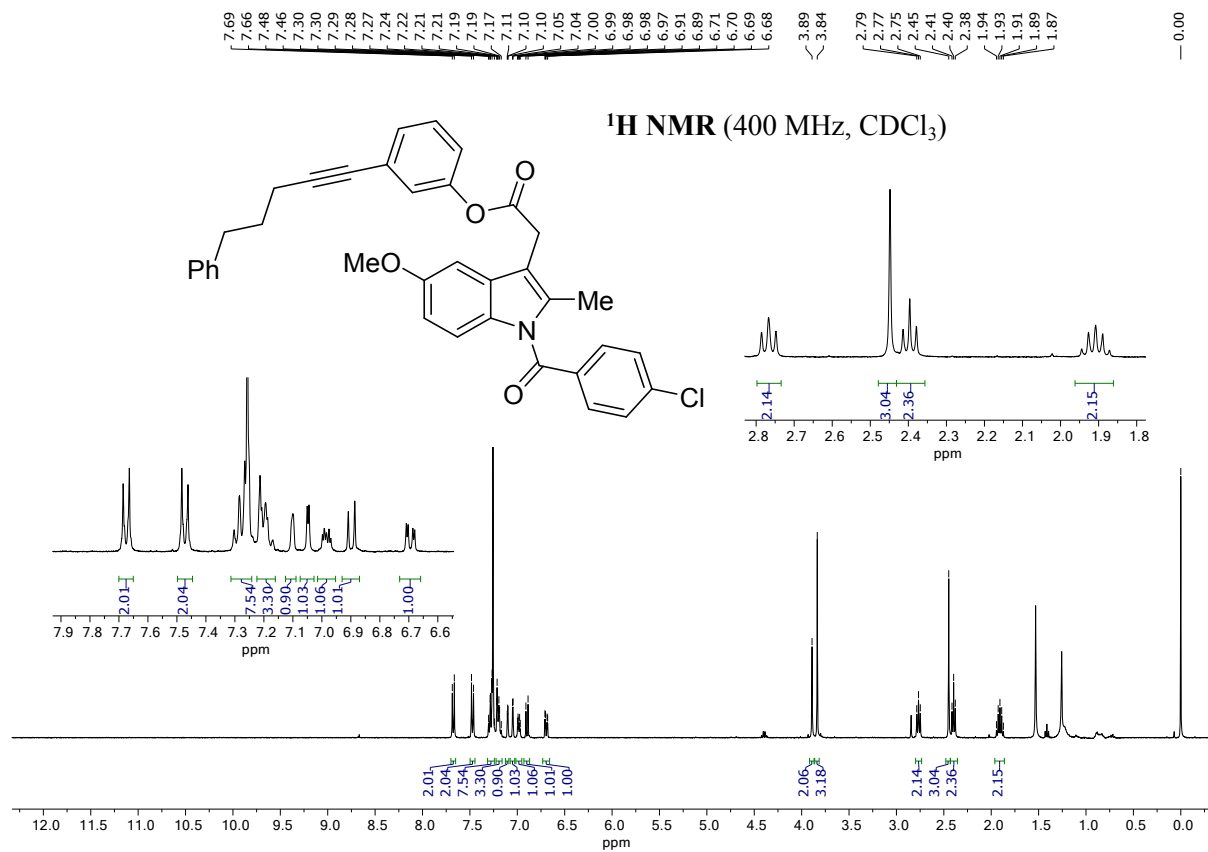

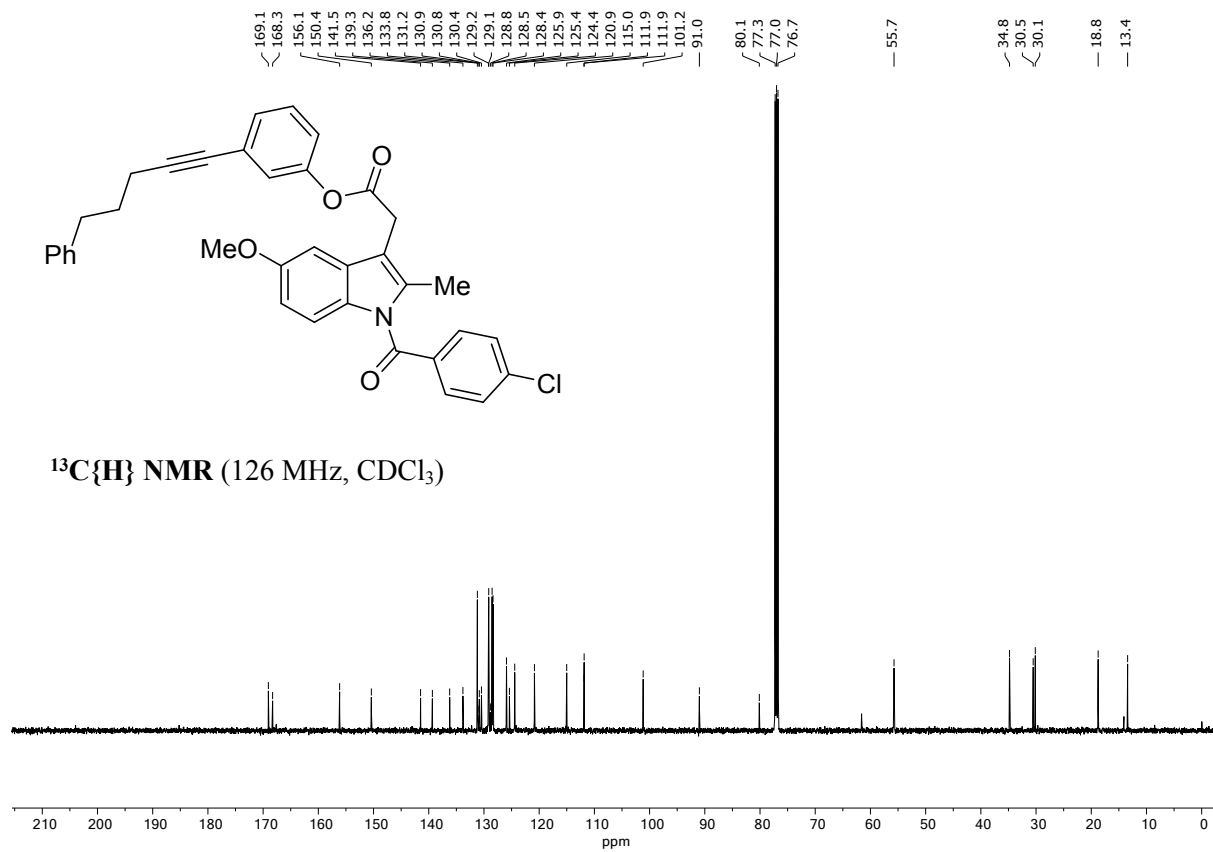

Supplement: gg2c00025_si_001.pdf [file gg2c00025_si_001.pdf]
